# Supplementary material for: Strong evidence for the adaptive walk model of gene evolution in Drosophila and Arabidopsis
Source: PubMed Central journal article supplement (PMC9470001; doi:10.1371/journal.pbio.3001775), 2022-09-13

# function\_age

af\_moutinho

15/04/2021

The first part of the script reproduces Figure S5, where the functions of young genes are presented.

```
# Libraries
library(plyr)
library(dplyr)
library(data.table)
library(ggplot2)
library(reshape2)
library(doBy)
library(knitr)
library(kableExtra)
#

# theme of the plot
theme.plot <- function(x) {
  theme(axis.title = element_text(face = "bold", color = "black", size=14),
        text = element_text(size=9),
        axis.title.x = element_text(margin = margin(t = 18, r = 10, b = 0, l = 0)),
        axis.title.y = element_text(margin = margin(t = 18, r = 10, b = 0, l = 0)),
        panel.grid.minor=element_blank(),
        panel.grid.major = element_line(colour = "grey", linetype = "dashed", size = 0.2),
        panel.grid.major.y=element_blank(),
        #strip.text.y = element_blank(),
        axis.text.x = element_text(angle = 60, hjust = 1))
}

# reproducing figure S5
age_function <- read.table(file = "~/Dropbox/SupplementaryData_GeneAge/Function/S25_Data.csv",
                          sep = "\t", header = T)
# change path to where you keep the data

# Drosophila
dmel_go <- subset(age_function, species == "Drosophila")

young_dmel <- na.omit(dmel_go[dmel_go$Clade == 11 | dmel_go$Clade == 12,])

GO_term <- as.character(names(table(young_dmel$GO_slim)))
ngenes <- as.numeric(table(young_dmel$GO_slim))
young_GO_dmel <- data.frame(GO_term, ngenes)

# plotting the functions of young genes:
# keep only GO terms with young genes
```

```

young_GO_dmel <- young_GO_dmel[young_GO_dmel$ngenes > 0,]
# order according to number of genes
young_GO_dmel <- young_GO_dmel[order(young_GO_dmel$ngenes, decreasing = FALSE),]

p.dmel.young <- ggplot(young_GO_dmel, aes(GO_term)) +
  geom_bar(aes(GO_term, ngenes), position = "dodge", stat = "identity", width = 0.7) +
  ylab("Number of genes") +
  xlab("Protein Functional Classification") +
  scale_x_discrete(limits = as.character(young_GO_dmel$GO_term), expand=c(-1, 4)) +
  theme_bw() +
  theme.plot() +
  coord_flip()
p.dmel.young

```

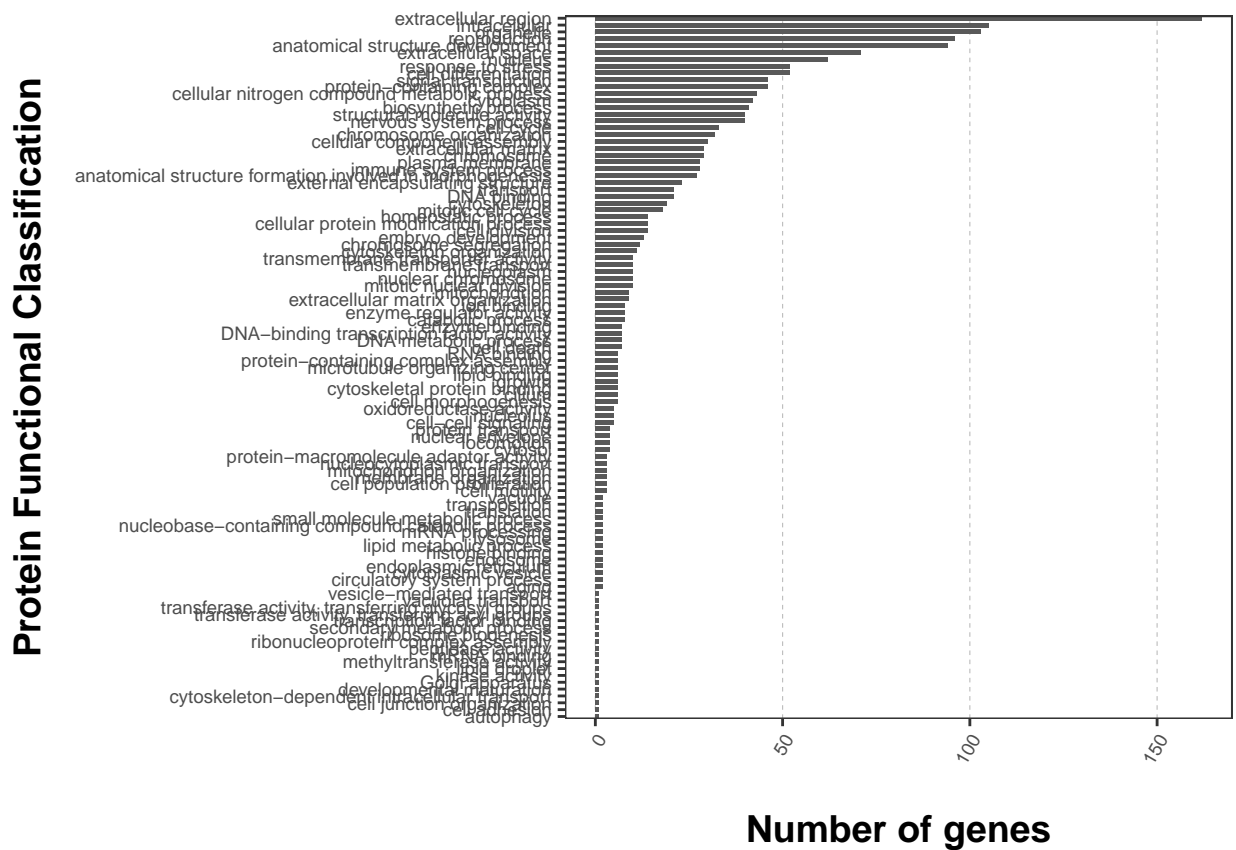

```

# Arabidopsis
arab_go <- subset(age_function, species == "Arabidopsis")

young_arab <- na.omit(arab_go[arab_go$Clade == 12 | arab_go$Clade == 13 |
  arab_go$Clade == 14 | arab_go$Clade == 15,])

GO_term <- as.character(names(table(young_arab$GO_slim)))
ngenes <- as.numeric(table(young_arab$GO_slim))
young_GO_arab <- data.frame(GO_term, ngenes)

```

```

# plotting the functions of young genes:
# keep only GO terms with young genes
young_GO_arab <- young_GO_arab[young_GO_arab$ngenes > 0,]
# order according to number of genes
young_GO_arab <- young_GO_arab[order(young_GO_arab$ngenes, decreasing = FALSE),]

p.arab.young <- ggplot(young_GO_arab, aes(GO_term)) +
  geom_bar(aes(GO_term, ngenes), position = "dodge", stat = "identity") +
  ylab("Number of genes") +
  xlab("Protein Functional Classification") +
  scale_x_discrete(limits = as.character(young_GO_arab$GO_term)) +
  theme_bw() +
  theme.plot() +
  coord_flip()
p.arab.young

```

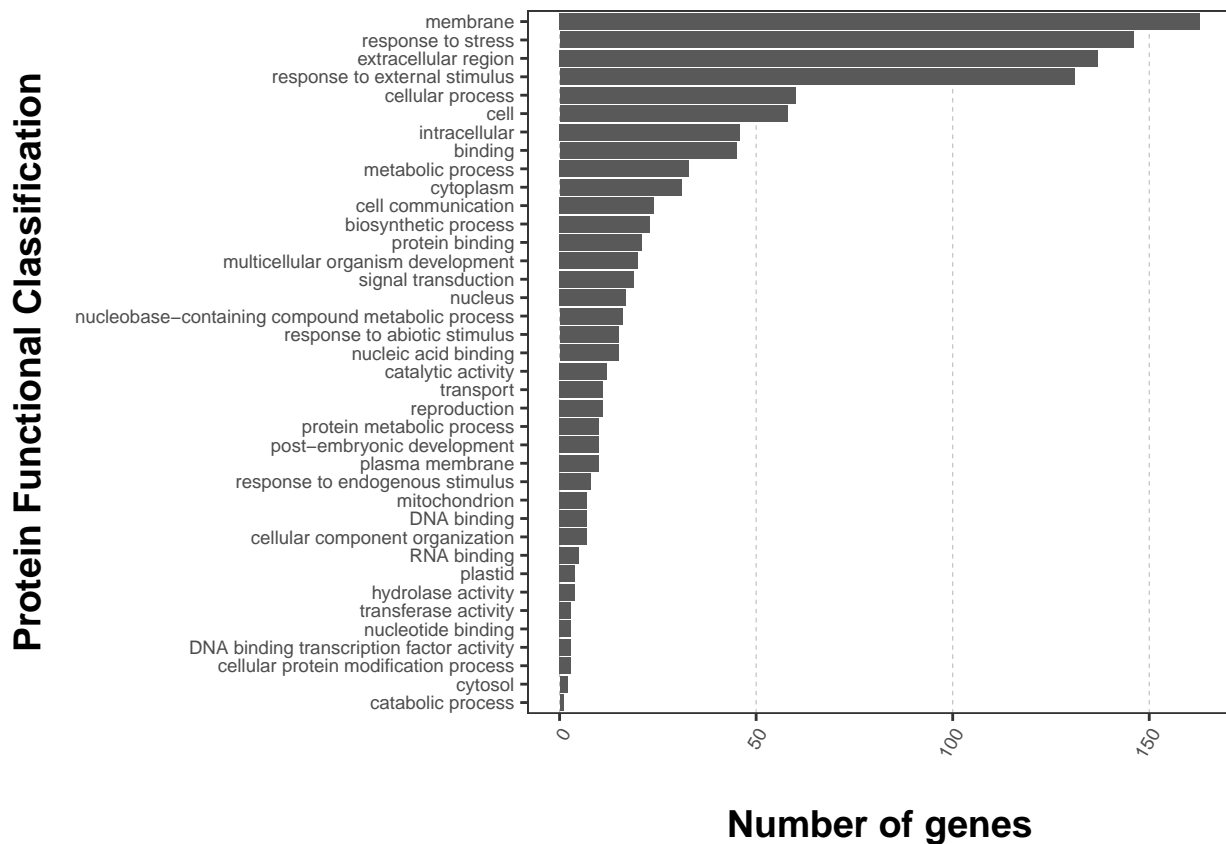

This script includes the data analysis of the gene age data together with protein function.

```

setwd("~/Dropbox/SupplementaryData_GeneAge/Function/")
# change path to where you keep the data

tbl.function <- read.table(file = "~/Dropbox/SupplementaryData_GeneAge/Function/S26_Data.csv",
  sep = "\t", header = TRUE)

# arranging the table for plotting (will only plot omega A and omega NA)

```

```
tbl.function2 <- melt(tbl.function, id.vars = c("GeneAge", "category", "co_factor", "species"),
  measure.vars = c("omegaNA", "omegaA"))

# function to estimate the mean and standard deviation to plot the results with the
# mean of the bootstrap replicates and the 95% confidence interval
fun <- function(x){
  c(mean=mean(x), sd=sd(x))
}

# applying the above function to each output table for each value of each estimate
# (dnfs, omegaA, omegaNA) for each value of the variable being analyzed for each species
tbl.sum <- summaryBy(value ~ variable + GeneAge + category + species + co_factor,
  data=tbl.function2, FUN = fun)

# variables as factors:
tbl.sum$variable <- factor(tbl.sum$variable, levels = c("omegaNA", "omegaA"))
levels(tbl.sum$variable) <- c(expression(omega[na]),expression(omega[a]))

tbl.sum$GeneAge <- as.character(tbl.sum$GeneAge)
```

## Including Plots

In the next chunk the script to plot the results is represented. The same order will follow.

```
# theme of the plot
theme.plot <- function(x) {
  theme(axis.title = element_text(face = "bold", color = "black", size=14),
    text = element_text(size=14),
    axis.title.x = element_text(margin = margin(t = 18, r = 10, b = 0, l = 0)),
    axis.title.y = element_text(margin = margin(t = 18, r = 10, b = 0, l = 0)),
    panel.grid.minor=element_blank(),
    panel.grid.major = element_line(colour = "grey", linetype = "dashed", size = 0.2),
    panel.grid.major.y=element_blank(),
    #strip.text.y = element_blank(),
    axis.text.x = element_text(angle = 60, hjust = 1))
}

#### DROSOPHILA
dmel.go.age <- subset(tbl.sum, species == "Drosophila")

# checking which functions have the highest values for omegaA
mean.vars.dmel <- ddply(dmel.go.age, c("category", "variable"), function(x) {
  mean.value <- mean(x$value.mean)
  data.frame(mean.value)
})

mean.omegaA <- subset(mean.vars.dmel, variable == "omega[a]")

# ordering the functions from low to high omega A values
mean.omegaA <- mean.omegaA[order(mean.omegaA$mean.value, decreasing = FALSE),]
dmel.go.age$GeneAge <- as.character(dmel.go.age$GeneAge)
```

```

# plot:
p.dmel <- ggplot(dmel.go.age, aes(x = category, y = value.mean, color = GeneAge)) +
  geom_line(col = "black", size = 0.1)+
  geom_errorbar(aes(ymin=value.mean - 1.96*value.sd,
                    ymax=value.mean + 1.96*value.sd, color = GeneAge), size = 0.6,
                alpha=0.8, width = .2) +
  geom_point(size=.6)+
  facet_wrap(~variable, scales = "free_x", labeller = label_parsed) +
  ylab("") +
  xlab("Protein Function") +
  scale_x_discrete(limits = as.character(mean.omegaA$category)) +
  scale_fill_grey() +
  scale_color_grey() +
  theme_bw() +
  theme.plot() +
  coord_flip()
p.dmel

```

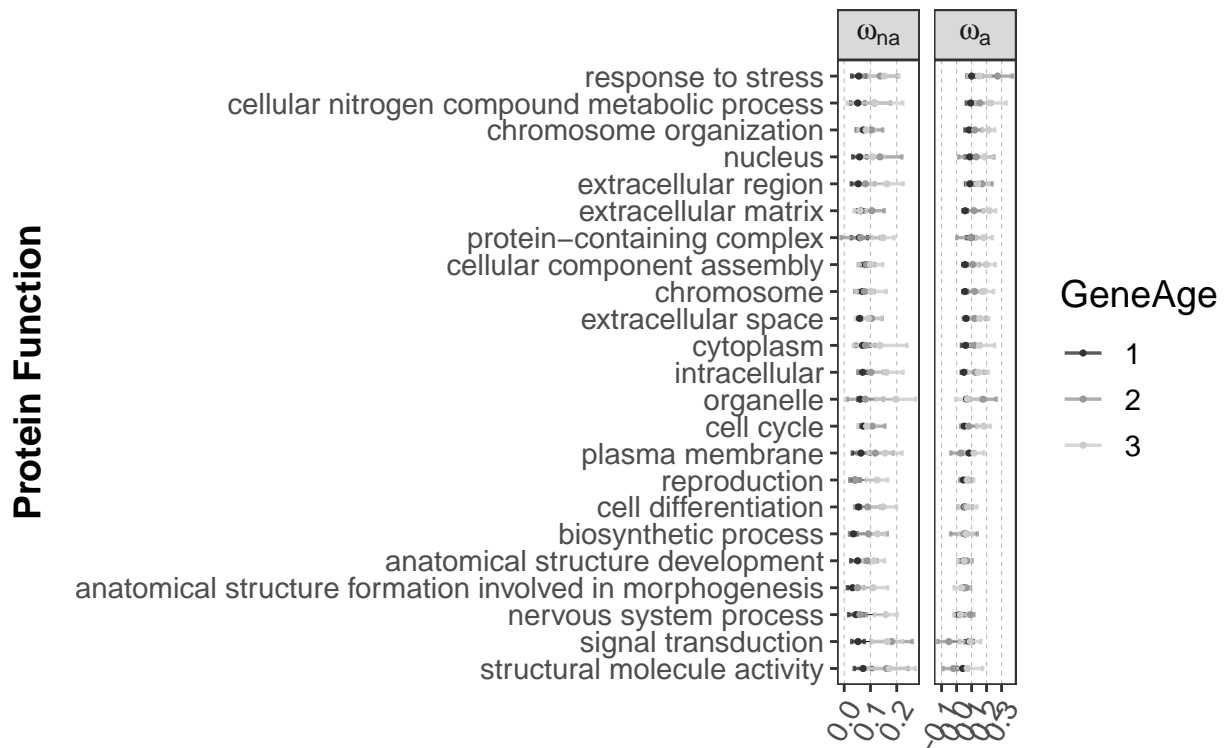

```

#### ARABIDOPSIS
arab.go.age <- subset(tbl.sum, species == "Arabidopsis")

# checking which functions have the highest values for omegaA
mean.vars <- dply(arab.go.age, c("category", "variable"), function(x) {
  mean.value <- mean(x$value.mean)
  data.frame(mean.value)
})

```

```

})
mean.omegaA <- subset(mean.vars, variable == "omega[a]")

# ordering the functions from low to high omega A values
mean.omegaA <- mean.omegaA[order(mean.omegaA$mean.value, decreasing = FALSE),]
arab.go.age$GeneAge <- as.character(arab.go.age$GeneAge)

# plot:
p.arab <- ggplot(arab.go.age, aes(x = category, y = value.mean, color = GeneAge)) +
  geom_line(col = "black", size = 0.1)+
  geom_errorbar(aes(ymin=value.mean - 1.96*value.sd,
                    ymax=value.mean + 1.96*value.sd, color = GeneAge), size = 0.6,
                alpha=0.8, width = .2) +
  geom_point(size=.6)+
  facet_wrap(~variable, scales = "free_x", labeller = label_parsed) +
  ylab("") +
  xlab("Protein Function") +
  scale_x_discrete(limits = as.character(mean.omegaA$category)) +
  scale_fill_grey() +
  scale_color_grey() +
  theme_bw() +
  theme_plot() +
  coord_flip()
p.arab

```

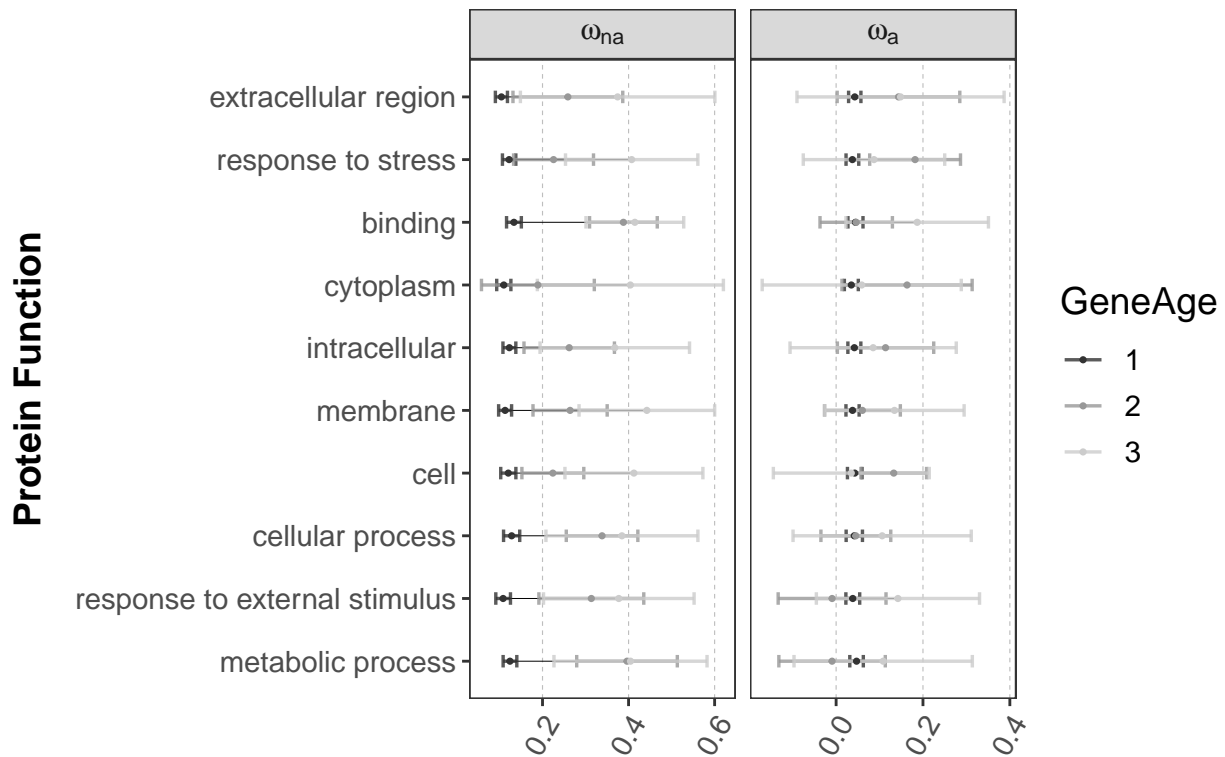

The last section shows how the statistical analyses were performed.

```

### something is wrong here --> check this
# estimating the differences between age classes for each bootstrap replicate
df.dif <- ddpoly(tbl.function2, c("species", "category", "co_factor", "variable"),
  .progress = "text", function(x) {
    age2_age1 <- x$value[x$GeneAge == 2] - x$value[x$GeneAge == 1]
    age3_age1 <- x$value[x$GeneAge == 3] - x$value[x$GeneAge == 1]
    age3_age2 <- x$value[x$GeneAge == 3] - x$value[x$GeneAge == 2]
    data.frame(age2_age1, age3_age1, age3_age2)
  })

```

```
## |
```

```

colnames(df.dif)[4] <- "estimate"

go.dif.age <- reshape2::melt(df.dif, id.vars = c("species", "category", "co_factor",
  "estimate"),
  measure.vars = c("age2_age1", "age3_age1",
    "age3_age2"))

# estimating the p-value between the different categories of age:
# Since we are sampling across bootstrap replicates, the p-values will be estimated 100 times and
# then the minimum p-value will be used
stats.dif.age <- ddpoly(go.dif.age, c("species", "category", "co_factor", "estimate",
  "variable"),
  function(x, N = 100) {
    c <- as.numeric(nrow(x[x$value < 0,]))
    c2 <- as.numeric(nrow(x[x$value > 0,]))
    m <- min(c, c2)
    p <- (2*m+1)/(N+1)
    data.frame(c, c2, m, p)
  })

# correcting for multiple testing:
# now applying p-adjust:
padjust.stats <- ddpoly(stats.dif.age, c("species", "category", "co_factor",
  "estimate"),
  .progress = "text", function(x) {
    x$p.value.adj <- p.adjust(x$p, method = "fdr")
    return(x)
  })

```

```
## |
```

```

kable(padjust.stats, caption = "Statistics for the combined analysis with protein function",
  format = "latex", booktabs = TRUE, longtable = TRUE) %>%
  kable_styling(font_size = 8, latex_options="striped") %>%
  column_spec(2, width = "15em")

```

Table 1: Statistics for the combined analysis with protein function

| species | category | co_factor | estimate | variable | c | c2 | m | p | p.value.adj |
|---------|----------|-----------|----------|----------|---|----|---|---|-------------|
|---------|----------|-----------|----------|----------|---|----|---|---|-------------|

|             |                               |          |         |           |    |     |    |           |           |
|-------------|-------------------------------|----------|---------|-----------|----|-----|----|-----------|-----------|
| Arabidopsis | binding                       | Function | omegaNA | age2_age1 | 0  | 100 | 0  | 0.0099010 | 0.0148515 |
| Arabidopsis | binding                       | Function | omegaNA | age3_age1 | 0  | 100 | 0  | 0.0099010 | 0.0148515 |
| Arabidopsis | binding                       | Function | omegaNA | age3_age2 | 35 | 65  | 35 | 0.7029703 | 0.7029703 |
| Arabidopsis | binding                       | Function | omegaA  | age2_age1 | 50 | 50  | 50 | 1.0000000 | 1.0000000 |
| Arabidopsis | binding                       | Function | omegaA  | age3_age1 | 6  | 94  | 6  | 0.1287129 | 0.2821782 |
| Arabidopsis | binding                       | Function | omegaA  | age3_age2 | 9  | 91  | 9  | 0.1881188 | 0.2821782 |
| Arabidopsis | cell                          | Function | omegaNA | age2_age1 | 0  | 100 | 0  | 0.0099010 | 0.0148515 |
| Arabidopsis | cell                          | Function | omegaNA | age3_age1 | 0  | 100 | 0  | 0.0099010 | 0.0148515 |
| Arabidopsis | cell                          | Function | omegaNA | age3_age2 | 2  | 98  | 2  | 0.0495050 | 0.0495050 |
| Arabidopsis | cell                          | Function | omegaA  | age2_age1 | 3  | 97  | 3  | 0.0693069 | 0.2079208 |
| Arabidopsis | cell                          | Function | omegaA  | age3_age1 | 57 | 43  | 43 | 0.8613861 | 0.8613861 |
| Arabidopsis | cell                          | Function | omegaA  | age3_age2 | 84 | 16  | 16 | 0.3267327 | 0.4900990 |
| Arabidopsis | cellular process              | Function | omegaNA | age2_age1 | 0  | 100 | 0  | 0.0099010 | 0.0297030 |
| Arabidopsis | cellular process              | Function | omegaNA | age3_age1 | 2  | 98  | 2  | 0.0495050 | 0.0742574 |
| Arabidopsis | cellular process              | Function | omegaNA | age3_age2 | 28 | 72  | 28 | 0.5643564 | 0.5643564 |
| Arabidopsis | cellular process              | Function | omegaA  | age2_age1 | 43 | 57  | 43 | 0.8613861 | 0.8613861 |
| Arabidopsis | cellular process              | Function | omegaA  | age3_age1 | 25 | 75  | 25 | 0.5049505 | 0.8613861 |
| Arabidopsis | cellular process              | Function | omegaA  | age3_age2 | 29 | 71  | 29 | 0.5841584 | 0.8613861 |
| Arabidopsis | cytoplasm                     | Function | omegaNA | age2_age1 | 11 | 89  | 11 | 0.2277228 | 0.2277228 |
| Arabidopsis | cytoplasm                     | Function | omegaNA | age3_age1 | 1  | 99  | 1  | 0.0297030 | 0.0891089 |
| Arabidopsis | cytoplasm                     | Function | omegaNA | age3_age2 | 6  | 94  | 6  | 0.1287129 | 0.1930693 |
| Arabidopsis | cytoplasm                     | Function | omegaA  | age2_age1 | 5  | 95  | 5  | 0.1089109 | 0.3267327 |
| Arabidopsis | cytoplasm                     | Function | omegaA  | age3_age1 | 45 | 55  | 45 | 0.9009901 | 0.9009901 |
| Arabidopsis | cytoplasm                     | Function | omegaA  | age3_age2 | 78 | 22  | 22 | 0.4455446 | 0.6683168 |
| Arabidopsis | extracellular region          | Function | omegaNA | age2_age1 | 1  | 99  | 1  | 0.0297030 | 0.0445545 |
| Arabidopsis | extracellular region          | Function | omegaNA | age3_age1 | 1  | 99  | 1  | 0.0297030 | 0.0445545 |
| Arabidopsis | extracellular region          | Function | omegaNA | age3_age2 | 19 | 81  | 19 | 0.3861386 | 0.3861386 |
| Arabidopsis | extracellular region          | Function | omegaA  | age2_age1 | 9  | 91  | 9  | 0.1881188 | 0.5643564 |
| Arabidopsis | extracellular region          | Function | omegaA  | age3_age1 | 19 | 81  | 19 | 0.3861386 | 0.5792079 |
| Arabidopsis | extracellular region          | Function | omegaA  | age3_age2 | 58 | 42  | 42 | 0.8415842 | 0.8415842 |
| Arabidopsis | intracellular                 | Function | omegaNA | age2_age1 | 1  | 99  | 1  | 0.0297030 | 0.0445545 |
| Arabidopsis | intracellular                 | Function | omegaNA | age3_age1 | 0  | 100 | 0  | 0.0099010 | 0.0297030 |
| Arabidopsis | intracellular                 | Function | omegaNA | age3_age2 | 11 | 89  | 11 | 0.2277228 | 0.2277228 |
| Arabidopsis | intracellular                 | Function | omegaA  | age2_age1 | 12 | 88  | 12 | 0.2475248 | 0.7425743 |
| Arabidopsis | intracellular                 | Function | omegaA  | age3_age1 | 34 | 66  | 34 | 0.6831683 | 0.7425743 |
| Arabidopsis | intracellular                 | Function | omegaA  | age3_age2 | 62 | 37  | 37 | 0.7425743 | 0.7425743 |
| Arabidopsis | membrane                      | Function | omegaNA | age2_age1 | 0  | 100 | 0  | 0.0099010 | 0.0148515 |
| Arabidopsis | membrane                      | Function | omegaNA | age3_age1 | 0  | 100 | 0  | 0.0099010 | 0.0148515 |
| Arabidopsis | membrane                      | Function | omegaNA | age3_age2 | 4  | 96  | 4  | 0.0891089 | 0.0891089 |
| Arabidopsis | membrane                      | Function | omegaA  | age2_age1 | 34 | 66  | 34 | 0.6831683 | 0.6831683 |
| Arabidopsis | membrane                      | Function | omegaA  | age3_age1 | 15 | 85  | 15 | 0.3069307 | 0.6831683 |
| Arabidopsis | membrane                      | Function | omegaA  | age3_age2 | 24 | 76  | 24 | 0.4851485 | 0.6831683 |
| Arabidopsis | metabolic process             | Function | omegaNA | age2_age1 | 0  | 100 | 0  | 0.0099010 | 0.0297030 |
| Arabidopsis | metabolic process             | Function | omegaNA | age3_age1 | 2  | 98  | 2  | 0.0495050 | 0.0742574 |
| Arabidopsis | metabolic process             | Function | omegaNA | age3_age2 | 47 | 53  | 47 | 0.9405941 | 0.9405941 |
| Arabidopsis | metabolic process             | Function | omegaA  | age2_age1 | 86 | 14  | 14 | 0.2871287 | 0.4306931 |
| Arabidopsis | metabolic process             | Function | omegaA  | age3_age1 | 29 | 71  | 29 | 0.5841584 | 0.5841584 |
| Arabidopsis | metabolic process             | Function | omegaA  | age3_age2 | 14 | 86  | 14 | 0.2871287 | 0.4306931 |
| Arabidopsis | response to external stimulus | Function | omegaNA | age2_age1 | 1  | 99  | 1  | 0.0297030 | 0.0445545 |
| Arabidopsis | response to external stimulus | Function | omegaNA | age3_age1 | 1  | 99  | 1  | 0.0297030 | 0.0445545 |
| Arabidopsis | response to external stimulus | Function | omegaNA | age3_age2 | 26 | 74  | 26 | 0.5247525 | 0.5247525 |
| Arabidopsis | response to external stimulus | Function | omegaA  | age2_age1 | 82 | 18  | 18 | 0.3663366 | 0.3663366 |
| Arabidopsis | response to external stimulus | Function | omegaA  | age3_age1 | 12 | 88  | 12 | 0.2475248 | 0.3663366 |
| Arabidopsis | response to external stimulus | Function | omegaA  | age3_age2 | 10 | 90  | 10 | 0.2079208 | 0.3663366 |
| Arabidopsis | response to stress            | Function | omegaNA | age2_age1 | 1  | 99  | 1  | 0.0297030 | 0.0297030 |
| Arabidopsis | response to stress            | Function | omegaNA | age3_age1 | 0  | 100 | 0  | 0.0099010 | 0.0297030 |
| Arabidopsis | response to stress            | Function | omegaNA | age3_age2 | 1  | 99  | 1  | 0.0297030 | 0.0297030 |
| Arabidopsis | response to stress            | Function | omegaA  | age2_age1 | 1  | 99  | 1  | 0.0297030 | 0.0891089 |
| Arabidopsis | response to stress            | Function | omegaA  | age3_age1 | 28 | 72  | 28 | 0.5643564 | 0.5643564 |



|             |                                                             |          |         |           |    |     |    |           |           |
|-------------|-------------------------------------------------------------|----------|---------|-----------|----|-----|----|-----------|-----------|
| Arabidopsis | response to stress                                          | Function | omegaA  | age3_age2 | 83 | 17  | 17 | 0.3465347 | 0.5198020 |
| Drosophila  | anatomical structure development                            | Function | omegaNA | age2_age1 | 3  | 97  | 3  | 0.0693069 | 0.1039604 |
| Drosophila  | anatomical structure development                            | Function | omegaNA | age3_age1 | 0  | 100 | 0  | 0.0099010 | 0.0297030 |
| Drosophila  | anatomical structure development                            | Function | omegaNA | age3_age2 | 25 | 75  | 25 | 0.5049505 | 0.5049505 |
| Drosophila  | anatomical structure development                            | Function | omegaA  | age2_age1 | 24 | 76  | 24 | 0.4851485 | 0.9009901 |
| Drosophila  | anatomical structure development                            | Function | omegaA  | age3_age1 | 45 | 54  | 45 | 0.9009901 | 0.9009901 |
| Drosophila  | anatomical structure development                            | Function | omegaA  | age3_age2 | 66 | 34  | 34 | 0.6831683 | 0.9009901 |
| Drosophila  | anatomical structure formation<br>involved in morphogenesis | Function | omegaNA | age2_age1 | 7  | 93  | 7  | 0.1485149 | 0.1485149 |
| Drosophila  | anatomical structure formation<br>involved in morphogenesis | Function | omegaNA | age3_age1 | 1  | 99  | 1  | 0.0297030 | 0.0742574 |
| Drosophila  | anatomical structure formation<br>involved in morphogenesis | Function | omegaNA | age3_age2 | 2  | 98  | 2  | 0.0495050 | 0.0742574 |
| Drosophila  | anatomical structure formation<br>involved in morphogenesis | Function | omegaA  | age2_age1 | 25 | 75  | 25 | 0.5049505 | 0.5445545 |
| Drosophila  | anatomical structure formation<br>involved in morphogenesis | Function | omegaA  | age3_age1 | 73 | 27  | 27 | 0.5445545 | 0.5445545 |
| Drosophila  | anatomical structure formation<br>involved in morphogenesis | Function | omegaA  | age3_age2 | 81 | 18  | 18 | 0.3663366 | 0.5445545 |
| Drosophila  | biosynthetic process                                        | Function | omegaNA | age2_age1 | 2  | 98  | 2  | 0.0495050 | 0.0742574 |
| Drosophila  | biosynthetic process                                        | Function | omegaNA | age3_age1 | 0  | 100 | 0  | 0.0099010 | 0.0297030 |
| Drosophila  | biosynthetic process                                        | Function | omegaNA | age3_age2 | 21 | 79  | 21 | 0.4257426 | 0.4257426 |
| Drosophila  | biosynthetic process                                        | Function | omegaA  | age2_age1 | 57 | 43  | 43 | 0.8613861 | 0.8613861 |
| Drosophila  | biosynthetic process                                        | Function | omegaA  | age3_age1 | 35 | 65  | 35 | 0.7029703 | 0.8613861 |
| Drosophila  | biosynthetic process                                        | Function | omegaA  | age3_age2 | 36 | 64  | 36 | 0.7227723 | 0.8613861 |
| Drosophila  | cell cycle                                                  | Function | omegaNA | age2_age1 | 19 | 81  | 19 | 0.3861386 | 0.4851485 |
| Drosophila  | cell cycle                                                  | Function | omegaNA | age3_age1 | 21 | 79  | 21 | 0.4257426 | 0.4851485 |
| Drosophila  | cell cycle                                                  | Function | omegaNA | age3_age2 | 76 | 24  | 24 | 0.4851485 | 0.4851485 |
| Drosophila  | cell cycle                                                  | Function | omegaA  | age2_age1 | 10 | 90  | 10 | 0.2079208 | 0.2079208 |
| Drosophila  | cell cycle                                                  | Function | omegaA  | age3_age1 | 0  | 100 | 0  | 0.0099010 | 0.0297030 |
| Drosophila  | cell cycle                                                  | Function | omegaA  | age3_age2 | 1  | 99  | 1  | 0.0297030 | 0.0445545 |
| Drosophila  | cell differentiation                                        | Function | omegaNA | age2_age1 | 11 | 89  | 11 | 0.2277228 | 0.2277228 |
| Drosophila  | cell differentiation                                        | Function | omegaNA | age3_age1 | 0  | 100 | 0  | 0.0099010 | 0.0297030 |
| Drosophila  | cell differentiation                                        | Function | omegaNA | age3_age2 | 7  | 93  | 7  | 0.1485149 | 0.2227723 |
| Drosophila  | cell differentiation                                        | Function | omegaA  | age2_age1 | 46 | 54  | 46 | 0.9207921 | 0.9207921 |
| Drosophila  | cell differentiation                                        | Function | omegaA  | age3_age1 | 21 | 79  | 21 | 0.4257426 | 0.9207921 |
| Drosophila  | cell differentiation                                        | Function | omegaA  | age3_age2 | 33 | 67  | 33 | 0.6633663 | 0.9207921 |
| Drosophila  | cellular component assembly                                 | Function | omegaNA | age2_age1 | 41 | 59  | 41 | 0.8217822 | 0.8217822 |
| Drosophila  | cellular component assembly                                 | Function | omegaNA | age3_age1 | 14 | 86  | 14 | 0.2871287 | 0.8217822 |
| Drosophila  | cellular component assembly                                 | Function | omegaNA | age3_age2 | 35 | 65  | 35 | 0.7029703 | 0.8217822 |
| Drosophila  | cellular component assembly                                 | Function | omegaA  | age2_age1 | 2  | 98  | 2  | 0.0495050 | 0.0693069 |
| Drosophila  | cellular component assembly                                 | Function | omegaA  | age3_age1 | 0  | 100 | 0  | 0.0099010 | 0.0297030 |
| Drosophila  | cellular component assembly                                 | Function | omegaA  | age3_age2 | 3  | 97  | 3  | 0.0693069 | 0.0693069 |
| Drosophila  | cellular nitrogen compound<br>metabolic process             | Function | omegaNA | age2_age1 | 0  | 100 | 0  | 0.0099010 | 0.0297030 |
| Drosophila  | cellular nitrogen compound<br>metabolic process             | Function | omegaNA | age3_age1 | 13 | 87  | 13 | 0.2673267 | 0.4009901 |
| Drosophila  | cellular nitrogen compound<br>metabolic process             | Function | omegaNA | age3_age2 | 50 | 50  | 50 | 1.0000000 | 1.0000000 |
| Drosophila  | cellular nitrogen compound<br>metabolic process             | Function | omegaA  | age2_age1 | 9  | 91  | 9  | 0.1881188 | 0.2821782 |
| Drosophila  | cellular nitrogen compound<br>metabolic process             | Function | omegaA  | age3_age1 | 1  | 99  | 1  | 0.0297030 | 0.0891089 |
| Drosophila  | cellular nitrogen compound<br>metabolic process             | Function | omegaA  | age3_age2 | 18 | 82  | 18 | 0.3663366 | 0.3663366 |
| Drosophila  | chromosome                                                  | Function | omegaNA | age2_age1 | 46 | 54  | 46 | 0.9207921 | 0.9207921 |
| Drosophila  | chromosome                                                  | Function | omegaNA | age3_age1 | 5  | 95  | 5  | 0.1089109 | 0.3267327 |
| Drosophila  | chromosome                                                  | Function | omegaNA | age3_age2 | 25 | 75  | 25 | 0.5049505 | 0.7574257 |
| Drosophila  | chromosome                                                  | Function | omegaA  | age2_age1 | 0  | 100 | 0  | 0.0099010 | 0.0148515 |
| Drosophila  | chromosome                                                  | Function | omegaA  | age3_age1 | 0  | 100 | 0  | 0.0099010 | 0.0148515 |

|            |                         |          |         |           |     |     |    |           |           |
|------------|-------------------------|----------|---------|-----------|-----|-----|----|-----------|-----------|
| Drosophila | chromosome              | Function | omegaA  | age3_age2 | 7   | 93  | 7  | 0.1485149 | 0.1485149 |
| Drosophila | chromosome organization | Function | omegaNA | age2_age1 | 14  | 86  | 14 | 0.2871287 | 0.5495050 |
| Drosophila | chromosome organization | Function | omegaNA | age3_age1 | 32  | 68  | 32 | 0.6435644 | 0.6435644 |
| Drosophila | chromosome organization | Function | omegaNA | age3_age2 | 82  | 18  | 18 | 0.3663366 | 0.5495050 |
| Drosophila | chromosome organization | Function | omegaA  | age2_age1 | 10  | 90  | 10 | 0.2079208 | 0.2079208 |
| Drosophila | chromosome organization | Function | omegaA  | age3_age1 | 0   | 100 | 0  | 0.0099010 | 0.0297030 |
| Drosophila | chromosome organization | Function | omegaA  | age3_age2 | 1   | 99  | 1  | 0.0297030 | 0.0445545 |
| Drosophila | cytoplasm               | Function | omegaNA | age2_age1 | 41  | 59  | 41 | 0.8217822 | 0.8217822 |
| Drosophila | cytoplasm               | Function | omegaNA | age3_age1 | 2   | 98  | 2  | 0.0495050 | 0.1485149 |
| Drosophila | cytoplasm               | Function | omegaNA | age3_age2 | 14  | 86  | 14 | 0.2871287 | 0.4306931 |
| Drosophila | cytoplasm               | Function | omegaA  | age2_age1 | 2   | 98  | 2  | 0.0495050 | 0.0742574 |
| Drosophila | cytoplasm               | Function | omegaA  | age3_age1 | 2   | 98  | 2  | 0.0495050 | 0.0742574 |
| Drosophila | cytoplasm               | Function | omegaA  | age3_age2 | 30  | 70  | 30 | 0.6039604 | 0.6039604 |
| Drosophila | extracellular matrix    | Function | omegaNA | age2_age1 | 5   | 95  | 5  | 0.1089109 | 0.1930693 |
| Drosophila | extracellular matrix    | Function | omegaNA | age3_age1 | 71  | 29  | 29 | 0.5841584 | 0.5841584 |
| Drosophila | extracellular matrix    | Function | omegaNA | age3_age2 | 94  | 6   | 6  | 0.1287129 | 0.1930693 |
| Drosophila | extracellular matrix    | Function | omegaA  | age2_age1 | 3   | 97  | 3  | 0.0693069 | 0.0693069 |
| Drosophila | extracellular matrix    | Function | omegaA  | age3_age1 | 0   | 100 | 0  | 0.0099010 | 0.0297030 |
| Drosophila | extracellular matrix    | Function | omegaA  | age3_age2 | 2   | 98  | 2  | 0.0495050 | 0.0693069 |
| Drosophila | extracellular region    | Function | omegaNA | age2_age1 | 10  | 90  | 10 | 0.2079208 | 0.2079208 |
| Drosophila | extracellular region    | Function | omegaNA | age3_age1 | 0   | 100 | 0  | 0.0099010 | 0.0297030 |
| Drosophila | extracellular region    | Function | omegaNA | age3_age2 | 2   | 98  | 2  | 0.0495050 | 0.0742574 |
| Drosophila | extracellular region    | Function | omegaA  | age2_age1 | 2   | 98  | 2  | 0.0495050 | 0.1485149 |
| Drosophila | extracellular region    | Function | omegaA  | age3_age1 | 6   | 94  | 6  | 0.1287129 | 0.1930693 |
| Drosophila | extracellular region    | Function | omegaA  | age3_age2 | 72  | 27  | 27 | 0.5445545 | 0.5445545 |
| Drosophila | extracellular space     | Function | omegaNA | age2_age1 | 1   | 99  | 1  | 0.0297030 | 0.0891089 |
| Drosophila | extracellular space     | Function | omegaNA | age3_age1 | 5   | 95  | 5  | 0.1089109 | 0.1633663 |
| Drosophila | extracellular space     | Function | omegaNA | age3_age2 | 68  | 32  | 32 | 0.6435644 | 0.6435644 |
| Drosophila | extracellular space     | Function | omegaA  | age2_age1 | 8   | 92  | 8  | 0.1683168 | 0.2524752 |
| Drosophila | extracellular space     | Function | omegaA  | age3_age1 | 1   | 99  | 1  | 0.0297030 | 0.0891089 |
| Drosophila | extracellular space     | Function | omegaA  | age3_age2 | 22  | 78  | 22 | 0.4455446 | 0.4455446 |
| Drosophila | intracellular           | Function | omegaNA | age2_age1 | 20  | 80  | 20 | 0.4059406 | 0.4059406 |
| Drosophila | intracellular           | Function | omegaNA | age3_age1 | 0   | 100 | 0  | 0.0099010 | 0.0297030 |
| Drosophila | intracellular           | Function | omegaNA | age3_age2 | 6   | 94  | 6  | 0.1287129 | 0.1930693 |
| Drosophila | intracellular           | Function | omegaA  | age2_age1 | 0   | 100 | 0  | 0.0099010 | 0.0297030 |
| Drosophila | intracellular           | Function | omegaA  | age3_age1 | 2   | 98  | 2  | 0.0495050 | 0.0742574 |
| Drosophila | intracellular           | Function | omegaA  | age3_age2 | 29  | 71  | 29 | 0.5841584 | 0.5841584 |
| Drosophila | nervous system process  | Function | omegaNA | age2_age1 | 15  | 85  | 15 | 0.3069307 | 0.3069307 |
| Drosophila | nervous system process  | Function | omegaNA | age3_age1 | 0   | 100 | 0  | 0.0099010 | 0.0148515 |
| Drosophila | nervous system process  | Function | omegaNA | age3_age2 | 0   | 100 | 0  | 0.0099010 | 0.0148515 |
| Drosophila | nervous system process  | Function | omegaA  | age2_age1 | 0   | 100 | 0  | 0.0099010 | 0.0148515 |
| Drosophila | nervous system process  | Function | omegaA  | age3_age1 | 44  | 56  | 44 | 0.8811881 | 0.8811881 |
| Drosophila | nervous system process  | Function | omegaA  | age3_age2 | 100 | 0   | 0  | 0.0099010 | 0.0148515 |
| Drosophila | nucleus                 | Function | omegaNA | age2_age1 | 2   | 98  | 2  | 0.0495050 | 0.0742574 |
| Drosophila | nucleus                 | Function | omegaNA | age3_age1 | 1   | 99  | 1  | 0.0297030 | 0.0742574 |
| Drosophila | nucleus                 | Function | omegaNA | age3_age2 | 69  | 31  | 31 | 0.6237624 | 0.6237624 |
| Drosophila | nucleus                 | Function | omegaA  | age2_age1 | 23  | 77  | 23 | 0.4653465 | 0.4653465 |
| Drosophila | nucleus                 | Function | omegaA  | age3_age1 | 0   | 100 | 0  | 0.0099010 | 0.0297030 |
| Drosophila | nucleus                 | Function | omegaA  | age3_age2 | 17  | 83  | 17 | 0.3465347 | 0.4653465 |
| Drosophila | organelle               | Function | omegaNA | age2_age1 | 38  | 62  | 38 | 0.7623762 | 0.7623762 |
| Drosophila | organelle               | Function | omegaNA | age3_age1 | 0   | 100 | 0  | 0.0099010 | 0.0297030 |
| Drosophila | organelle               | Function | omegaNA | age3_age2 | 2   | 98  | 2  | 0.0495050 | 0.0742574 |
| Drosophila | organelle               | Function | omegaA  | age2_age1 | 2   | 98  | 2  | 0.0495050 | 0.1485149 |
| Drosophila | organelle               | Function | omegaA  | age3_age1 | 49  | 51  | 49 | 0.9801980 | 0.9801980 |
| Drosophila | organelle               | Function | omegaA  | age3_age2 | 95  | 5   | 5  | 0.1089109 | 0.1633663 |
| Drosophila | plasma membrane         | Function | omegaNA | age2_age1 | 10  | 90  | 10 | 0.2079208 | 0.3118812 |
| Drosophila | plasma membrane         | Function | omegaNA | age3_age1 | 0   | 100 | 0  | 0.0099010 | 0.0297030 |
| Drosophila | plasma membrane         | Function | omegaNA | age3_age2 | 29  | 71  | 29 | 0.5841584 | 0.5841584 |
| Drosophila | plasma membrane         | Function | omegaA  | age2_age1 | 89  | 11  | 11 | 0.2277228 | 0.3415842 |

|            |                              |          |         |           |     |     |    |           |           |
|------------|------------------------------|----------|---------|-----------|-----|-----|----|-----------|-----------|
| Drosophila | plasma membrane              | Function | omegaA  | age3_age1 | 20  | 80  | 20 | 0.4059406 | 0.4059406 |
| Drosophila | plasma membrane              | Function | omegaA  | age3_age2 | 1   | 99  | 1  | 0.0297030 | 0.0891089 |
| Drosophila | protein-containing complex   | Function | omegaNA | age2_age1 | 58  | 42  | 42 | 0.8415842 | 0.8415842 |
| Drosophila | protein-containing complex   | Function | omegaNA | age3_age1 | 0   | 100 | 0  | 0.0099010 | 0.0297030 |
| Drosophila | protein-containing complex   | Function | omegaNA | age3_age2 | 3   | 97  | 3  | 0.0693069 | 0.1039604 |
| Drosophila | protein-containing complex   | Function | omegaA  | age2_age1 | 45  | 55  | 45 | 0.9009901 | 0.9009901 |
| Drosophila | protein-containing complex   | Function | omegaA  | age3_age1 | 0   | 100 | 0  | 0.0099010 | 0.0297030 |
| Drosophila | protein-containing complex   | Function | omegaA  | age3_age2 | 7   | 93  | 7  | 0.1485149 | 0.2227723 |
| Drosophila | reproduction                 | Function | omegaNA | age2_age1 | 45  | 55  | 45 | 0.9009901 | 0.9009901 |
| Drosophila | reproduction                 | Function | omegaNA | age3_age1 | 0   | 100 | 0  | 0.0099010 | 0.0148515 |
| Drosophila | reproduction                 | Function | omegaNA | age3_age2 | 0   | 100 | 0  | 0.0099010 | 0.0148515 |
| Drosophila | reproduction                 | Function | omegaA  | age2_age1 | 3   | 97  | 3  | 0.0693069 | 0.2079208 |
| Drosophila | reproduction                 | Function | omegaA  | age3_age1 | 11  | 89  | 11 | 0.2277228 | 0.3415842 |
| Drosophila | reproduction                 | Function | omegaA  | age3_age2 | 60  | 40  | 40 | 0.8019802 | 0.8019802 |
| Drosophila | response to stress           | Function | omegaNA | age2_age1 | 0   | 100 | 0  | 0.0099010 | 0.0297030 |
| Drosophila | response to stress           | Function | omegaNA | age3_age1 | 1   | 99  | 1  | 0.0297030 | 0.0445545 |
| Drosophila | response to stress           | Function | omegaNA | age3_age2 | 26  | 74  | 26 | 0.5247525 | 0.5247525 |
| Drosophila | response to stress           | Function | omegaA  | age2_age1 | 0   | 100 | 0  | 0.0099010 | 0.0297030 |
| Drosophila | response to stress           | Function | omegaA  | age3_age1 | 10  | 90  | 10 | 0.2079208 | 0.2079208 |
| Drosophila | response to stress           | Function | omegaA  | age3_age2 | 97  | 3   | 3  | 0.0693069 | 0.1039604 |
| Drosophila | signal transduction          | Function | omegaNA | age2_age1 | 0   | 100 | 0  | 0.0099010 | 0.0148515 |
| Drosophila | signal transduction          | Function | omegaNA | age3_age1 | 0   | 100 | 0  | 0.0099010 | 0.0148515 |
| Drosophila | signal transduction          | Function | omegaNA | age3_age2 | 65  | 35  | 35 | 0.7029703 | 0.7029703 |
| Drosophila | signal transduction          | Function | omegaA  | age2_age1 | 100 | 0   | 0  | 0.0099010 | 0.0148515 |
| Drosophila | signal transduction          | Function | omegaA  | age3_age1 | 45  | 55  | 45 | 0.9009901 | 0.9009901 |
| Drosophila | signal transduction          | Function | omegaA  | age3_age2 | 0   | 100 | 0  | 0.0099010 | 0.0148515 |
| Drosophila | structural molecule activity | Function | omegaNA | age2_age1 | 3   | 97  | 3  | 0.0693069 | 0.1039604 |
| Drosophila | structural molecule activity | Function | omegaNA | age3_age1 | 1   | 99  | 1  | 0.0297030 | 0.0891089 |
| Drosophila | structural molecule activity | Function | omegaNA | age3_age2 | 46  | 54  | 46 | 0.9207921 | 0.9207921 |
| Drosophila | structural molecule activity | Function | omegaA  | age2_age1 | 96  | 4   | 4  | 0.0891089 | 0.2673267 |
| Drosophila | structural molecule activity | Function | omegaA  | age3_age1 | 25  | 75  | 25 | 0.5049505 | 0.5049505 |
| Drosophila | structural molecule activity | Function | omegaA  | age3_age2 | 10  | 90  | 10 | 0.2079208 | 0.3118812 |

checking the functions coded by genes present in clades 6 & 7 (Figure S8):

```
# sub-setting the data to keep only the genes present in clades 6&7
clades_peak <- subset(dmel_go, Clade == 6 | Clade == 7)

# estimating the total number of genes in each function
genes.clades <- ddply(dmel_go, "GO_slim", function(x) {
  n_total <- nrow(x)
  data.frame(n_total)
})

# number of annotated genes in the functions present in clades 6&7:
ngenues_peak <- ddply(clades_peak, "GO_slim", function(x) {
  n <- nrow(x)
  data.frame(n)
})

# combining both tables:
clades_go <- merge(ngenues_peak, genes.clades, by = c("GO_slim"))

# estimating the frequency of genes in these clades:
```

```

clades_go$p.genes <- clades_go$n/clades_go$n_total
clades_go <- clades_go[order(clades_go$p.genes, decreasing = FALSE),]

# estimating the summary:
s.clades <- summary(clades_go$p.genes)

# plotting only those functions for which the frequency is higher than the median value:
sub.clades <- clades_go[clades_go$p.genes > as.numeric(s.clades[3]),]

# plotting
p.clades <- ggplot(sub.clades, aes(GO_slim)) +
  geom_bar(aes(GO_slim, p.genes), position = "dodge", stat = "identity") +
  ylab("Frequency of genes") +
  xlab("Protein Functional Classification") +
  scale_x_discrete(limits = as.character(sub.clades$GO_slim)) +
  theme_bw() +
  theme.plot() +
  coord_flip()
p.clades

```

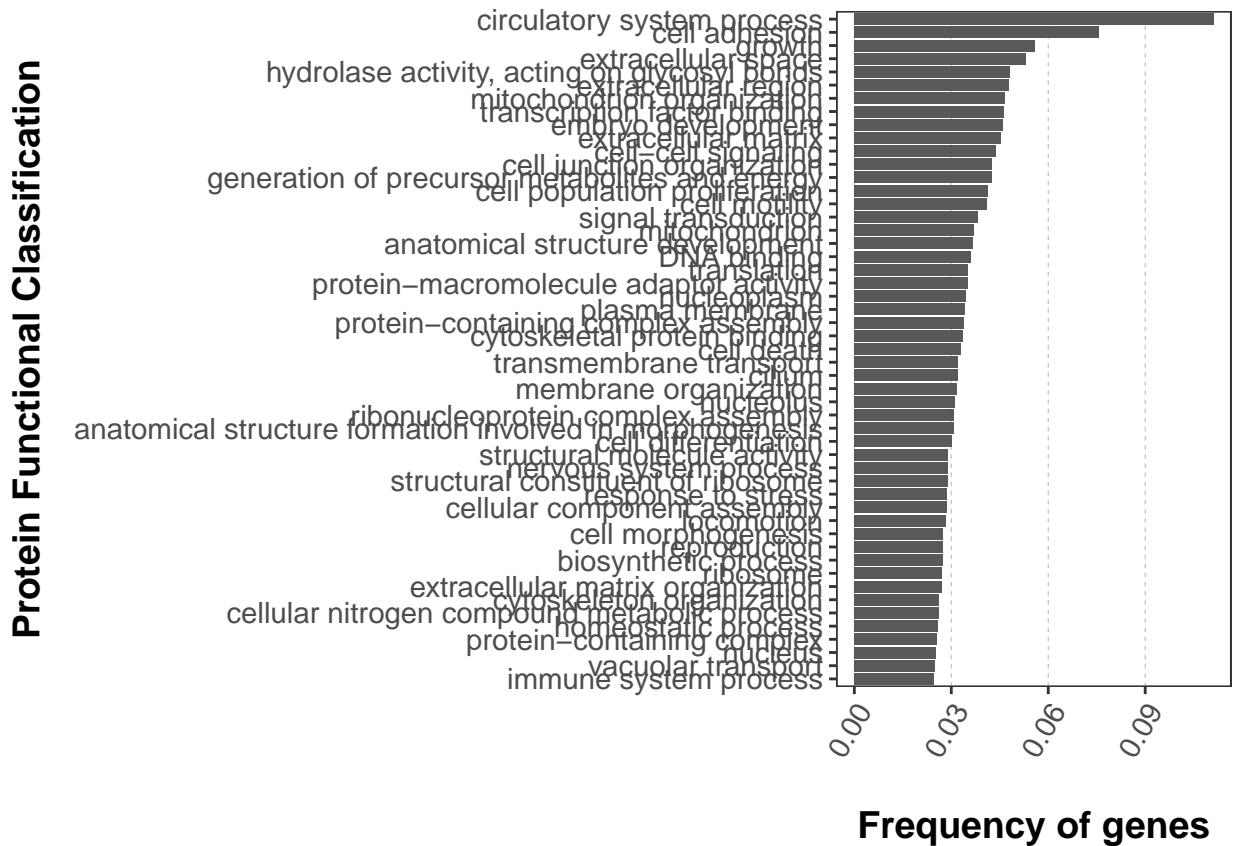

Supplement: pbio.3001775.s049.pdf [file pbio.3001775.s049.pdf]
