# Supplementary material for: Strong evidence for the adaptive walk model of gene evolution in Drosophila and Arabidopsis
Source: PubMed Central journal article supplement (PMC9470001; doi:10.1371/journal.pbio.3001775), 2022-09-13
Supplement: pbio.3001775.s008.pdf [file pbio.3001775.s008.pdf]

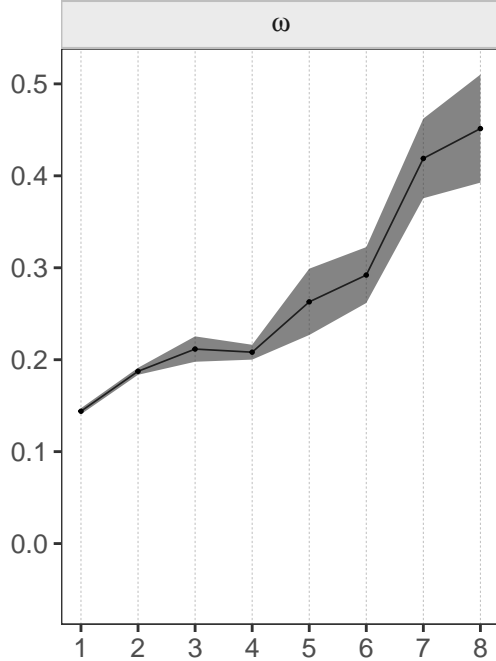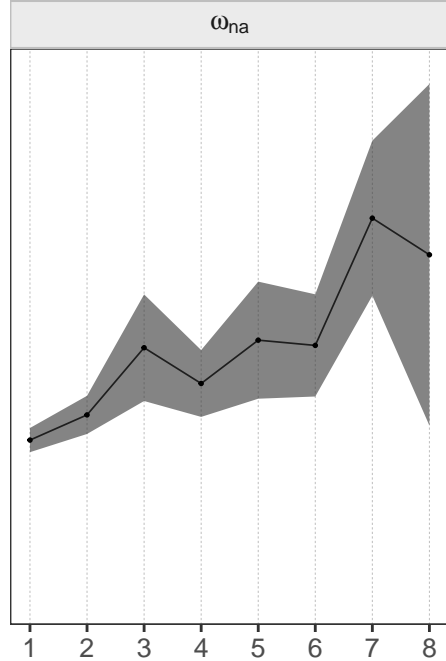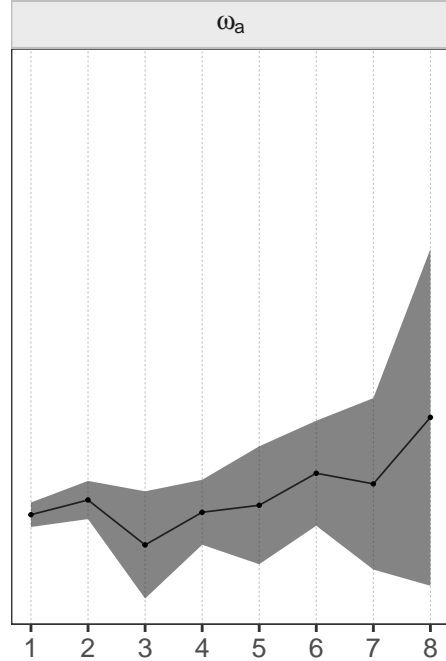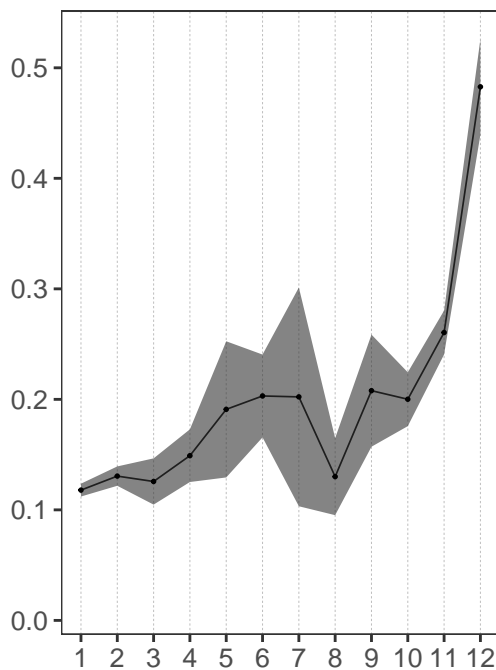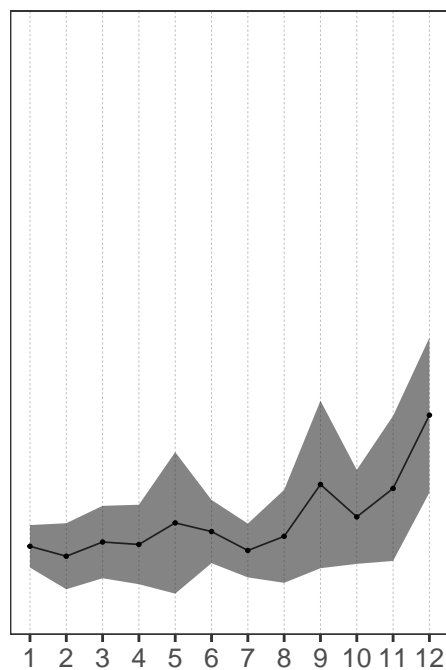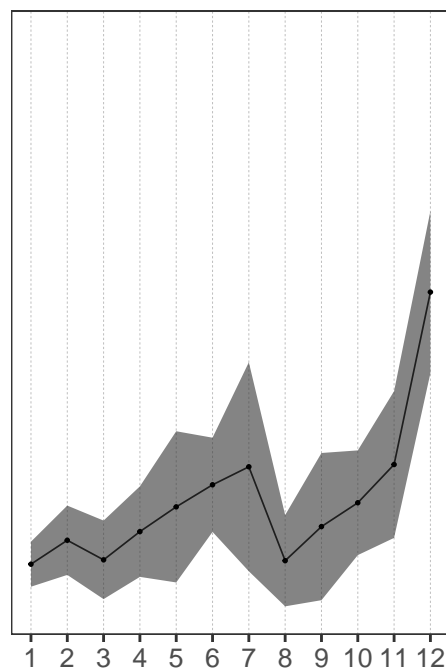

**Phylostrata Group**
