# Supplementary material for: Strong evidence for the adaptive walk model of gene evolution in Drosophila and Arabidopsis
Source: PubMed Central journal article supplement (PMC9470001; doi:10.1371/journal.pbio.3001775), 2022-09-13

Statistical group

a,b

a,b

a,b,c

a

a,b,c

a,b,c

a

d

f

c,d

b,c,d

e

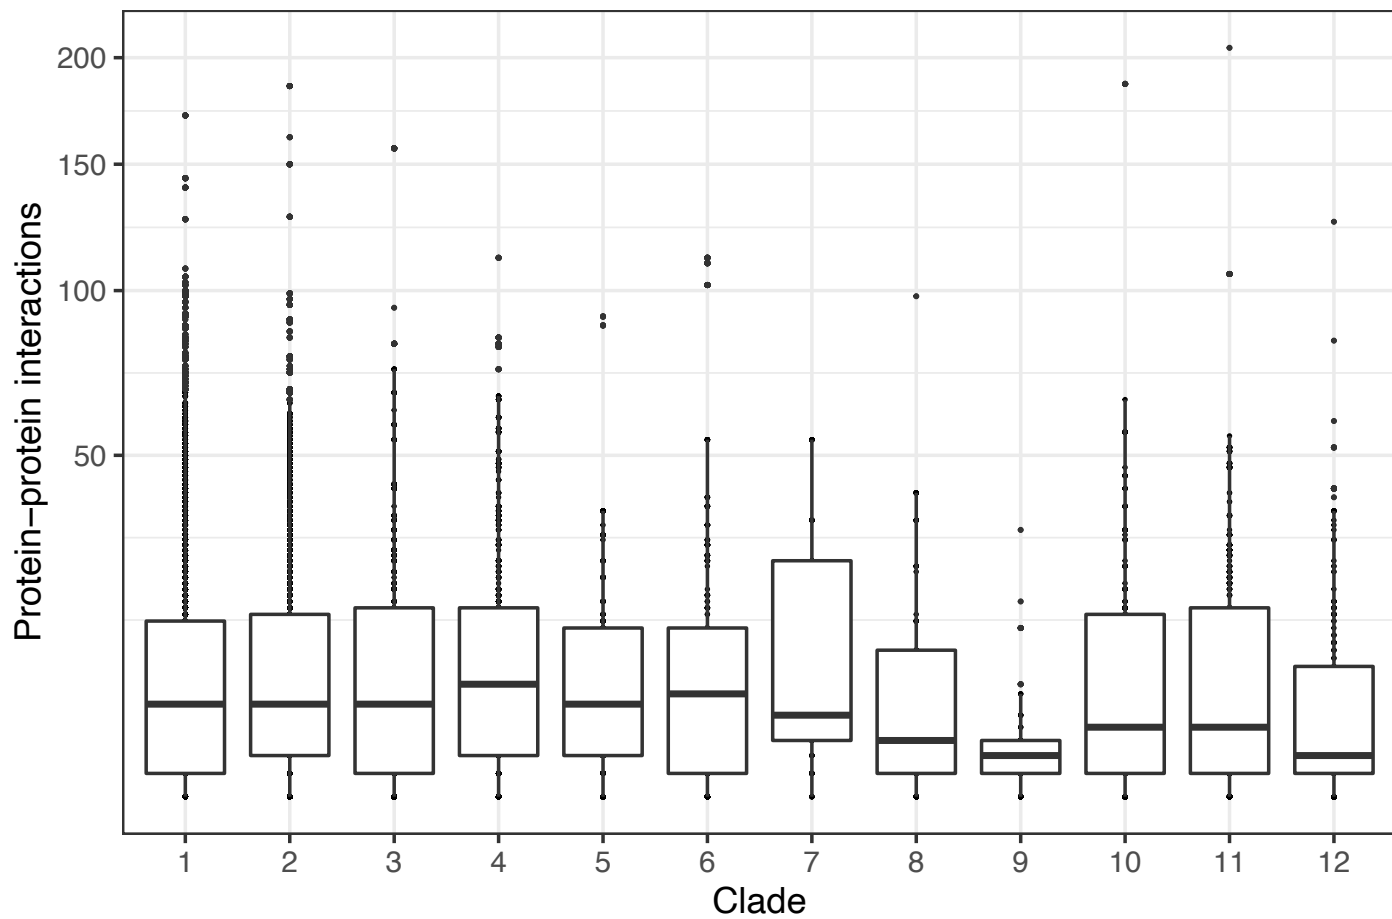

Supplement: pbio.3001775.s013.pdf [file pbio.3001775.s013.pdf]
