# Supplementary material for: Strong evidence for the adaptive walk model of gene evolution in Drosophila and Arabidopsis
Source: PubMed Central journal article supplement (PMC9470001; doi:10.1371/journal.pbio.3001775), 2022-09-13
Supplement: pbio.3001775.s051.pdf [file pbio.3001775.s051.pdf]

# Protein association analysis

af\_moutinho

23/04/2021

This script shows the analysis performed with protein association data.

```
setwd("~/Dropbox/SupplementaryData_GeneAge/PPI/")
# change here to the respective folder where you keep the data

# Libraries
library(plyr)
library(dplyr)
library(data.table)
library(ggplot2)
library(reshape2)
library(doBy)
library(knitr)
library(kableExtra)
library(agricolae)
#

# theme of the plot
theme.plot <- function(x) {
  theme(axis.title = element_text(face = "bold", color = "black", size=14),
        text = element_text(size=14),
        axis.title.x = element_text(margin = margin(t = 18, r = 10, b = 0, l = 0)),
        axis.title.y = element_text(margin = margin(t = 18, r = 10, b = 0, l = 0)),
        panel.grid.minor=element_blank(),
        panel.grid.major = element_line(colour = "grey", linetype = "dashed", size = 0.2),
        panel.grid.major.y=element_blank(),
        #strip.text.y = element_blank(),
        axis.text.x = element_text(angle = 60, hjust = 1))
}
#

df_prot_links <- read.table(file = "S29_Data.csv", sep = "\t", header = TRUE)
df_prot_links$Clade <- as.character(df_prot_links$Clade)

df_prot_links$Clade <- factor(df_prot_links$Clade,
                             levels = c("1", "2", "3", "4", "5", "6",
                                           "7", "8", "9", "10", "11", "12"))

df_prot_links <- na.omit(df_prot_links)
# doing a box plot with the distribution of the combined scores for ach protein pair in each clade:
### all prot links:
plot.scores.age <- ggplot(df_prot_links, aes(Clade, combined_score)) +
  geom_point(size = 0.1) +
```

```

geom_boxplot(stat = "boxplot", position = "dodge", outlier.size = 0.01) +
scale_y_sqrt() +
xlab("Clade") +
ylab("Combined scores of PPI") +
theme.plot() +
theme_bw()
plot.scores.age

```

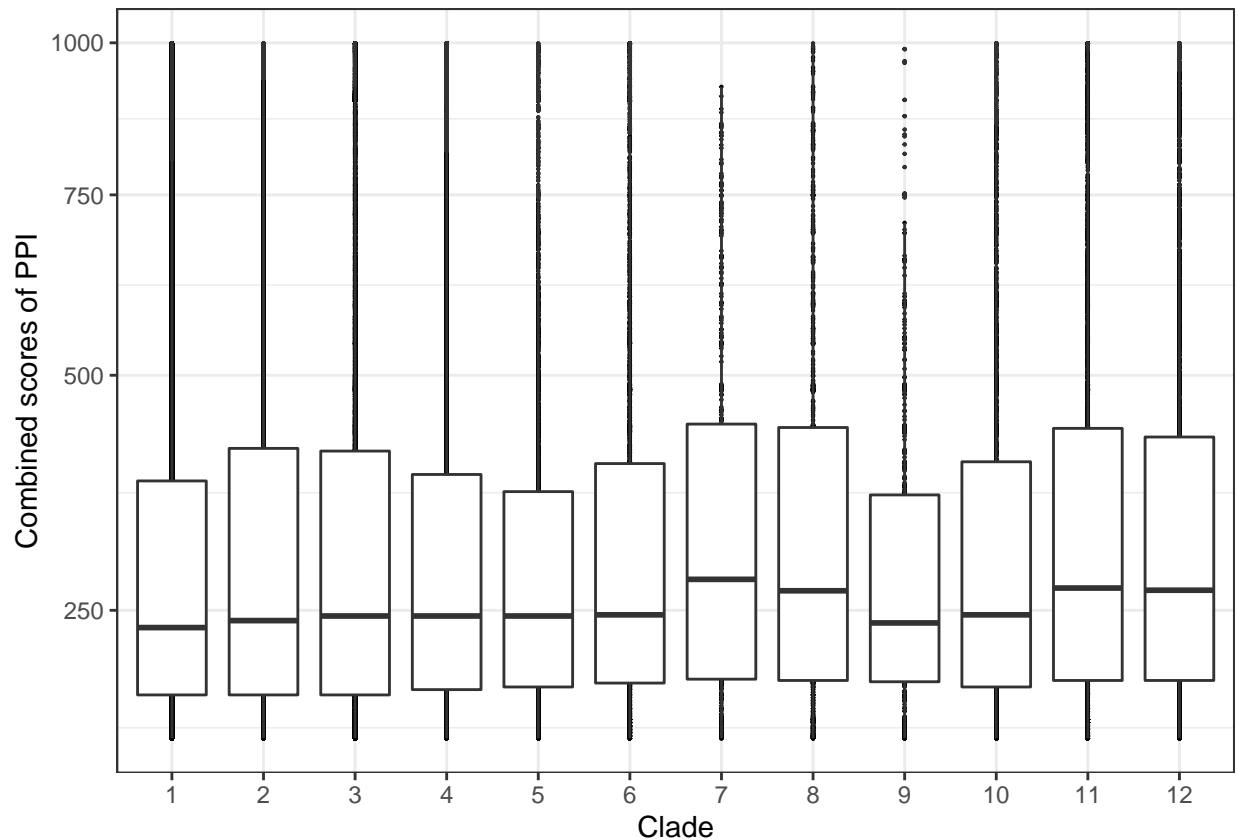

```

### statistical analyses:
kruskal.test(combined_score ~ Clade, df_prot_links)

```

Kruskal-Wallis rank sum test

data: combined\_score by Clade Kruskal-Wallis chi-squared = 753.07, df = 11, p-value < 2.2e-16

```

stats_links <- kruskal(df_prot_links$combined_score, df_prot_links$Clade, p.adj = "fdr", group = TRUE)
stat_group <- stats_links$groups
stat_group$Clade <- rownames(stat_group)

```

```

# presenting the table:
kable(x = stat_group, caption = "Statistical group for the combined scores in each clade")

```

Table 1: Statistical group for the combined scores in each clade

|    | df_prot_links\$combined_score | groups | Clade |
|----|-------------------------------|--------|-------|
| 7  | 446431.9                      | a      | 7     |
| 11 | 438037.7                      | a      | 11    |
| 12 | 434399.6                      | a      | 12    |
| 8  | 433011.5                      | a      | 8     |
| 6  | 414336.9                      | b      | 6     |
| 3  | 412601.4                      | b      | 3     |
| 10 | 412129.4                      | bc     | 10    |
| 2  | 412099.4                      | bc     | 2     |
| 4  | 406057.7                      | cd     | 4     |
| 5  | 401936.3                      | de     | 5     |
| 1  | 400438.9                      | e      | 1     |
| 9  | 390720.1                      | e      | 9     |
