# Supplementary material for: Strong evidence for the adaptive walk model of gene evolution in Drosophila and Arabidopsis
Source: PubMed Central journal article supplement (PMC9470001; doi:10.1371/journal.pbio.3001775), 2022-09-13
Supplement: pbio.3001775.s052.pdf [file pbio.3001775.s052.pdf]

# co-factor\_\_continuous

af\_moutinho

19/03/2021

This script includes the data analysis of the gene age data together with the analysed co-factors:

```
co.factors[[1]] <- protein intrinsic disorder co.factors[[2]] <- gene expression
```

```
co.factors[[3]] <- protein length
```

```
co.factors[[4]] <- mean relative solvent accessibility per gene
```

The first chunk of the script will show the correlations between gene age and each of the co-factors

```
setwd("~/Dropbox/SupplementaryData_GeneAge/Data/")
# change here to the respective folder where you keep the data

# Libraries
library(plyr)
library(dplyr)
library(data.table)
library(ggplot2)
library(reshape2)
library(doBy)
library(knitr)
library(kableExtra)
#

# theme of the plot
theme.plot <- function(x) {
  theme(axis.title = element_text(face = "bold", color = "black", size=14),
        text = element_text(size=14),
        axis.title.x = element_text(margin = margin(t = 18, r = 10, b = 0, l = 0)),
        axis.title.y = element_text(margin = margin(t = 18, r = 10, b = 0, l = 0)),
        panel.grid.minor=element_blank(),
        panel.grid.major = element_line(colour = "grey", linetype = "dashed", size = 0.2),
        panel.grid.major.y=element_blank(),
        #strip.text.y = element_blank(),
        axis.text.x = element_text(angle = 60, hjust = 1))
}

# calling data tables
data.files <- list.files(".", ".csv")

# reading each table into a list
data.list <- lapply(data.files, fread, header = TRUE, sep = "\t")

#####
```

```
#####
# Gene Age vs. Protein Length
length.age <- lapply(data.list, function(x) {
  na.omit(unique(subset(x, select = c("GeneID", "Clade", "Length", "species"))))
})

# saving the table S2 Data
length_age_df <- rbindlist(length.age)
write.table(length_age_df, file = "../Co-factors_continuous/S2_Data.csv", sep = "\t",
            col.names = T, row.names = F, quote = F)

# summarizing protein length data for each clade
fun.q <- function(x) {
  q <- quantile(x$Length, na.rm = TRUE)
  firstQ <- q[[2]]
  thirdQ <- q[[4]]
  med.length <- q[[3]]
  tbl <- data.frame(med.length, firstQ, thirdQ)
}

sum.length.age <- lapply(length.age, function(x) {
  ddply(x, c("Clade", "species"), fun.q)
})

# plotting each of the output tables
plot.age.length <- lapply(sum.length.age, function(x) {
  ggplot(x, aes(x = Clade, y = med.length)) +
    geom_line(col = "black", size = 0.2)+
    geom_ribbon(aes(ymin=firstQ, ymax=thirdQ), alpha=0.2) +
    geom_point(size=.2)+
    ylab("") +
    xlab("Clade") +
    #scale_x_sqrt() +
    scale_fill_grey() +
    scale_color_grey() +
    ggtitle(as.character(x$species)) +
    theme_bw() +
    theme.plot()
})
plot.age.length
```

# Drosophila

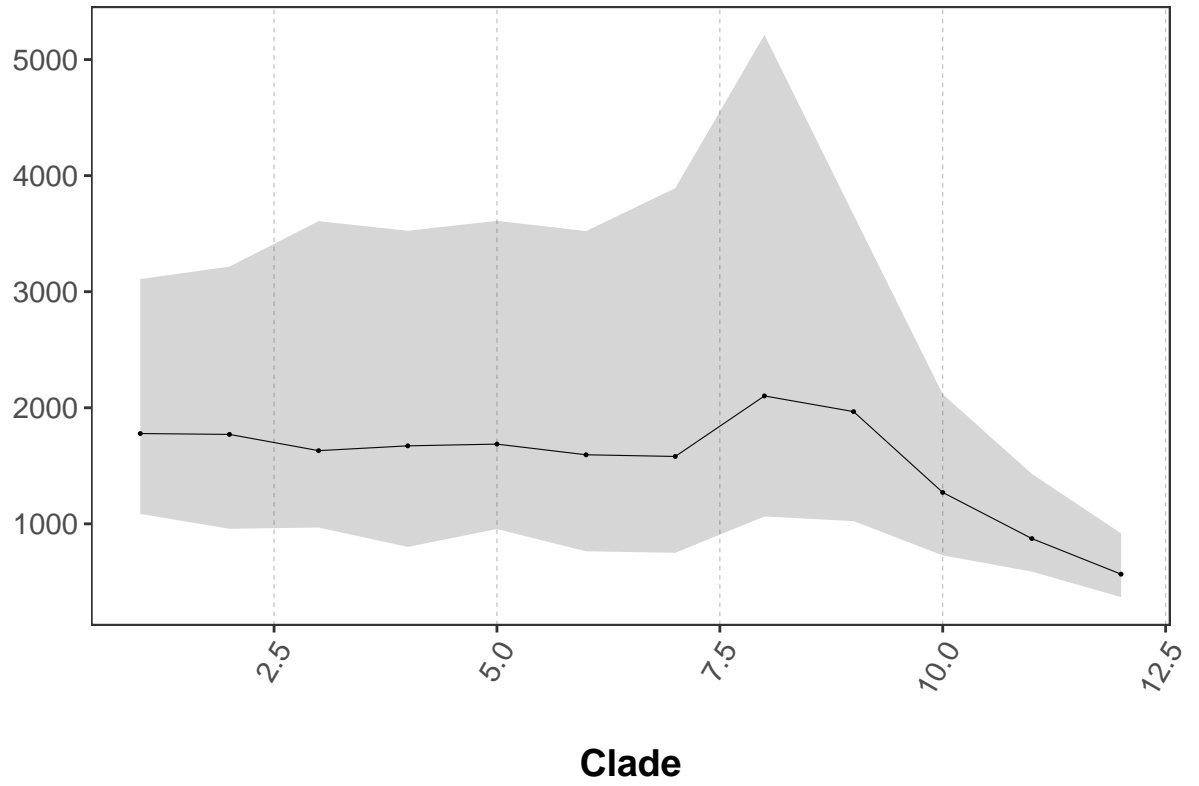

[[1]]

Table 1: Correlation between gene age and protein length in Drosophila

|     | species    | Kendall.tau | p.value   |
|-----|------------|-------------|-----------|
| tau | Drosophila | -0.4848485  | 0.0282123 |

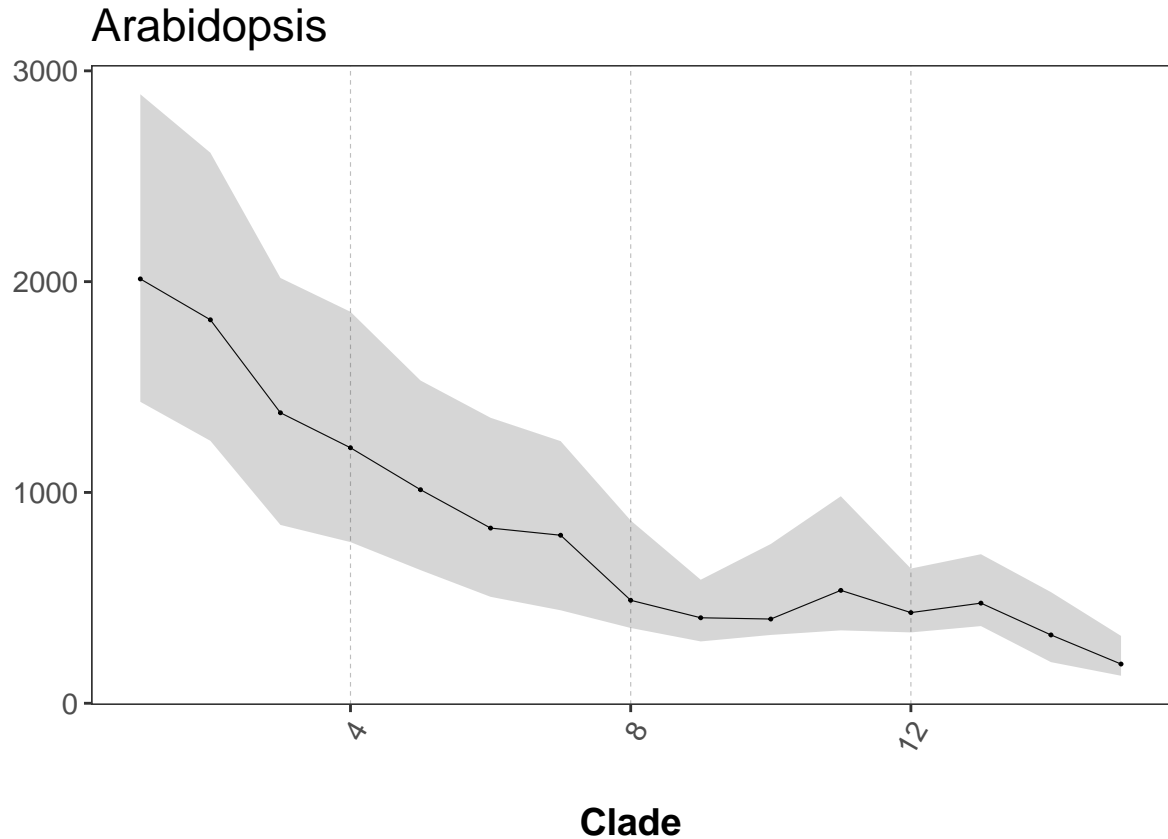

[[2]]

```
# estimating the correlations
stats.age.length <- lapply(sum.length.age, function(x) {
  cor.df <- cor.test(x$Clade, x$med.length, method = "kendall", exact = FALSE)
  species <- unique(x$species)
  Kendall.tau <- cor.df$estimate
  p.value <- cor.df$p.value
  data.frame(species, Kendall.tau, p.value)
})

# showing the tables
for(i in stats.age.length) {
  print(kable(x = i, caption = paste0("Correlation between gene age
                                     and protein length in ", unique(i$species))))
}
```

```
#####
#####
# Gene Age vs. Gene Expression
exp.age <- lapply(data.list, function(x) {
```

Table 2: Correlation between gene age and protein length in Arabidopsis

|     | species     | Kendall.tau | p.value  |
|-----|-------------|-------------|----------|
| tau | Arabidopsis | -0.847619   | 1.06e-05 |

```

na.omit(unique(subset(x, select = c("GeneID", "Clade", "ExpressionMean", "species"))))
})

# saving the table S3 Data
exp_age_df <- rbindlist(exp.age)
write.table(exp_age_df, file = "../Co-factors_continuous/S3_Data.csv", sep = "\t",
            col.names = T, row.names = F, quote = F)

# summarizing protein length data for each clade
fun.q <- function(x) {
  q <- quantile(x$ExpressionMean, na.rm = TRUE)
  firstQ <- q[[2]]
  thirdQ <- q[[4]]
  med.exp <- q[[3]]
  tbl <- data.frame(med.exp, firstQ, thirdQ)
}

sum.exp.age <- lapply(exp.age, function(x) {
  ddpoly(x, c("Clade", "species"), fun.q)
})

# plotting each of the output tables
plot.age.exp <- lapply(sum.exp.age, function(x) {
  ggplot(x, aes(x = Clade, y = med.exp)) +
  geom_line(col = "black", size = 0.2) +
  geom_ribbon(aes(ymin=firstQ, ymax=thirdQ), alpha=0.2) +
  geom_point(size=.2) +
  ylab("") +
  xlab("Clade") +
  #scale_x_sqrt() +
  scale_fill_grey() +
  scale_color_grey() +
  ggtitle(as.character(x$species)) +
  theme_bw() +
  theme.plot()
})
plot.age.exp

```

# Drosophila

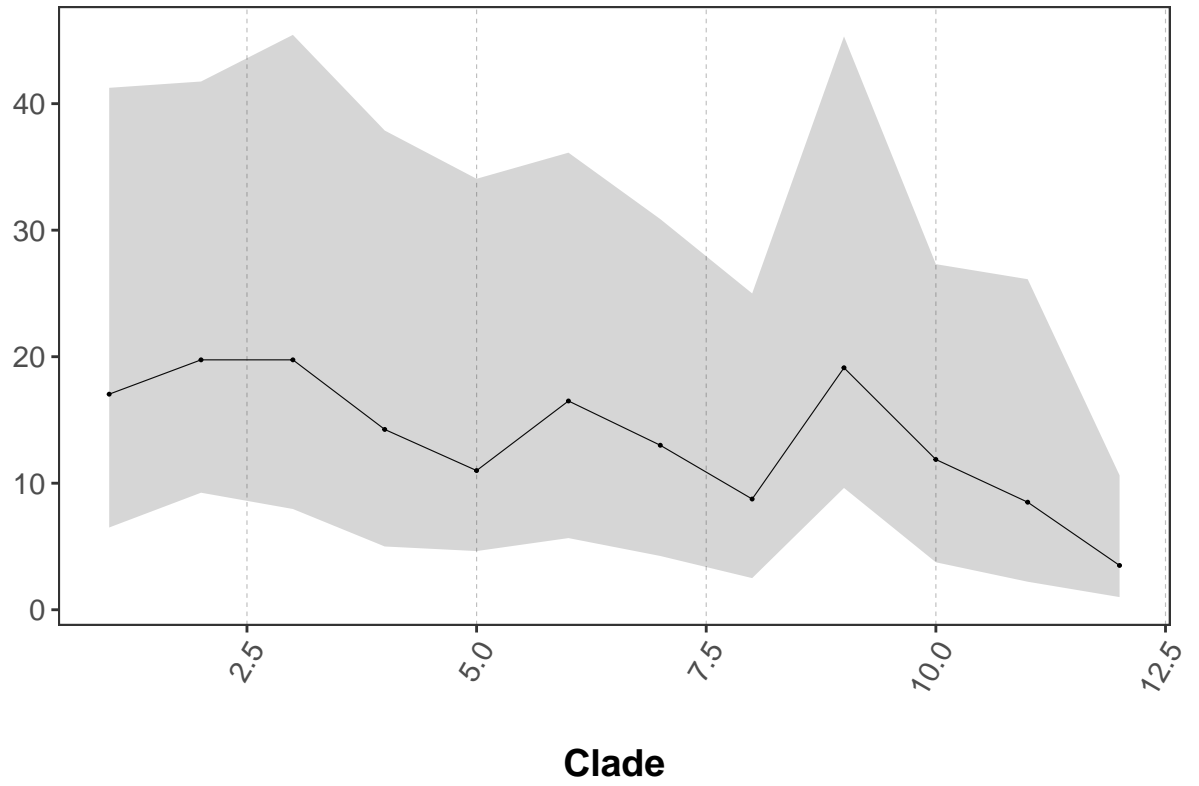

[[1]]

Table 3: Correlation between gene age and gene expression in Drosophila

|     | species    | Kendall.tau | p.value   |
|-----|------------|-------------|-----------|
| tau | Drosophila | -0.5954372  | 0.0073482 |

## Arabidopsis

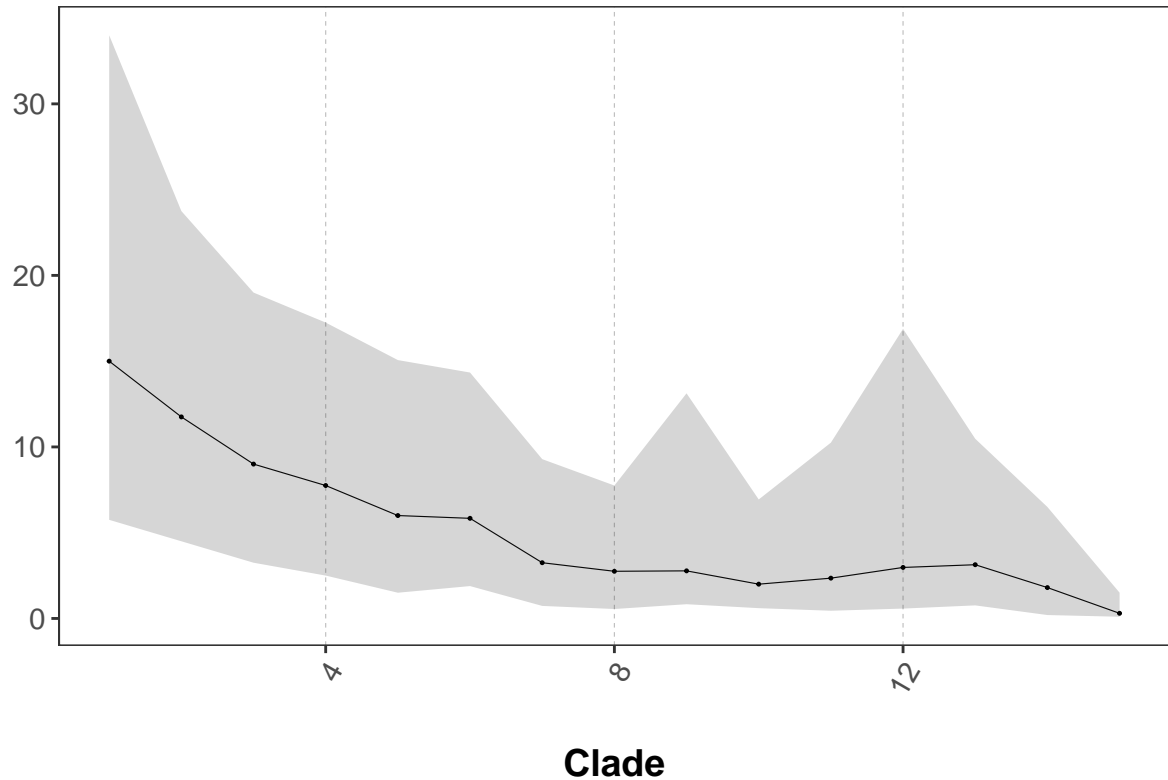

[[2]]

```
# estimating the correlations
stats.age.exp <- lapply(sum.exp.age, function(x) {
  cor.df <- cor.test(x$Clade, x$med.exp, method = "kendall", exact = FALSE)
  species <- unique(x$species)
  Kendall.tau <- cor.df$estimate
  p.value <- cor.df$p.value
  data.frame(species, Kendall.tau, p.value)
})

# showing the tables
for(i in stats.age.exp) {
  print(kable(x = i, caption = paste0("Correlation between gene age
                                     and gene expression in ", unique(i$species))))
}
```

```
#####
#####
# Gene Age vs. RSA
rsa.age <- lapply(data.list, function(x) {
```

Table 4: Correlation between gene age and gene expression in Arabidopsis

|     | species     | Kendall.tau | p.value |
|-----|-------------|-------------|---------|
| tau | Arabidopsis | -0.7904762  | 4e-05   |

```

na.omit(unique(subset(x, select = c("GeneID", "Clade", "mean.rsa", "species"))))
})

# saving the table S3 Data
rsa_age_df <- rbindlist(rsa.age)
write.table(rsa_age_df, file = "../Co-factors_continuous/S4_Data.csv", sep = "\t",
           col.names = T, row.names = F, quote = F)

# summarizing protein length data for each clade
fun.q <- function(x) {
  q <- quantile(x$mean.rsa, na.rm = TRUE)
  firstQ <- q[[2]]
  thirdQ <- q[[4]]
  med.rsa <- q[[3]]
  tbl <- data.frame(med.rsa, firstQ, thirdQ)
}

sum.rsa.age <- lapply(rsa.age, function(x) {
  ddpoly(x, c("Clade", "species"), fun.q)
})

# plotting each of the output tables
plot.age.rsa <- lapply(sum.rsa.age, function(x) {
  ggplot(x, aes(x = Clade, y = med.rsa)) +
  geom_line(col = "black", size = 0.2) +
  geom_ribbon(aes(ymin=firstQ, ymax=thirdQ), alpha=0.2) +
  geom_point(size=.2) +
  ylab("") +
  xlab("Clade") +
  #scale_x_sqrt() +
  scale_fill_grey() +
  scale_color_grey() +
  ggtitle(as.character(x$species)) +
  theme_bw() +
  theme.plot()
})
plot.age.rsa

```



# Drosophila

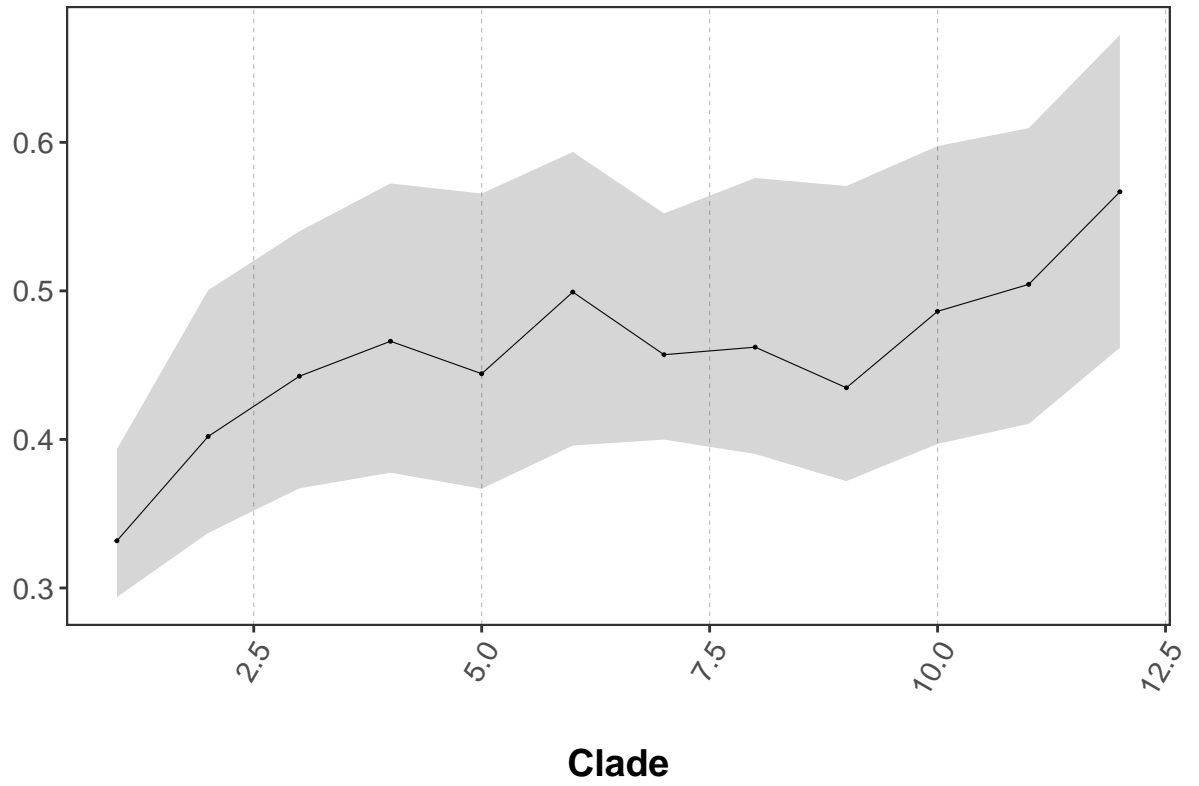

[[1]]

Table 5: Correlation between gene age and rsa in Drosophila

|     | species    | Kendall.tau | p.value   |
|-----|------------|-------------|-----------|
| tau | Drosophila | 0.6363636   | 0.0039762 |

## Arabidopsis

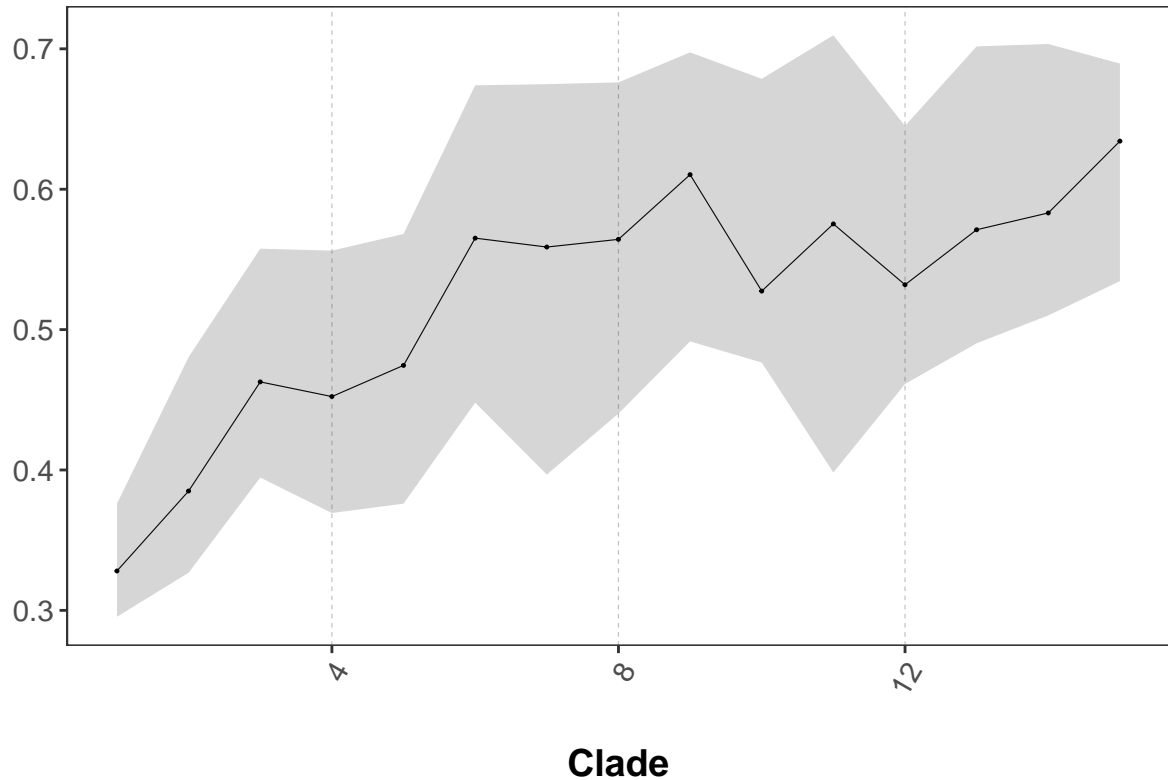

[[2]]

```
# estimating the correlations
stats.age.rsa <- lapply(sum.rsa.age, function(x) {
  cor.df <- cor.test(x$med.rsa, x$Clade, method = "kendall", exact = FALSE)
  species <- unique(x$species)
  Kendall.tau <- cor.df$estimate
  p.value <- cor.df$p.value
  data.frame(species, Kendall.tau, p.value)
})

# showing the tables
for(i in stats.age.rsa) {
  print(kable(x = i, caption = paste0("Correlation between gene age
                                     and rsa in ", unique(i$species))))
}
```

```
#####
#####
# Gene Age vs. Protein Intrinsic Disorder
disorder.age <- lapply(data.list, function(x) {
```

Table 6: Correlation between gene age and rsa in Arabidopsis

|     | species     | Kendall.tau | p.value   |
|-----|-------------|-------------|-----------|
| tau | Arabidopsis | 0.6952381   | 0.0003032 |

```

na.omit(unique(subset(x, select = c("GeneID", "Clade", "mean.dis", "species"))))
})

# saving the table S3 Data
dis_age_df <- rbindlist(disorder.age)
write.table(dis_age_df, file = "../Co-factors_continuous/S5_Data.csv", sep = "\t",
            col.names = T, row.names = F, quote = F)

# summarizing protein length data for each clade
fun.q <- function(x) {
  q <- quantile(x$mean.dis, na.rm = TRUE)
  firstQ <- q[[2]]
  thirdQ <- q[[4]]
  med.dis <- q[[3]]
  tbl <- data.frame(med.dis, firstQ, thirdQ)
}

sum.dis.age <- lapply(disorder.age, function(x) {
  ddpoly(x, c("Clade", "species"), fun.q)
})

# plotting each of the output tables
plot.age.dis <- lapply(sum.dis.age, function(x) {
  ggplot(x, aes(x = Clade, y = med.dis)) +
  geom_line(col = "black", size = 0.2) +
  geom_ribbon(aes(ymin=firstQ, ymax=thirdQ), alpha=0.2) +
  geom_point(size=.2) +
  ylab("") +
  xlab("Clade") +
  #scale_x_sqrt() +
  scale_fill_grey() +
  scale_color_grey() +
  ggtitle(as.character(x$species)) +
  theme_bw() +
  theme.plot()
})
plot.age.dis

```

# Drosophila

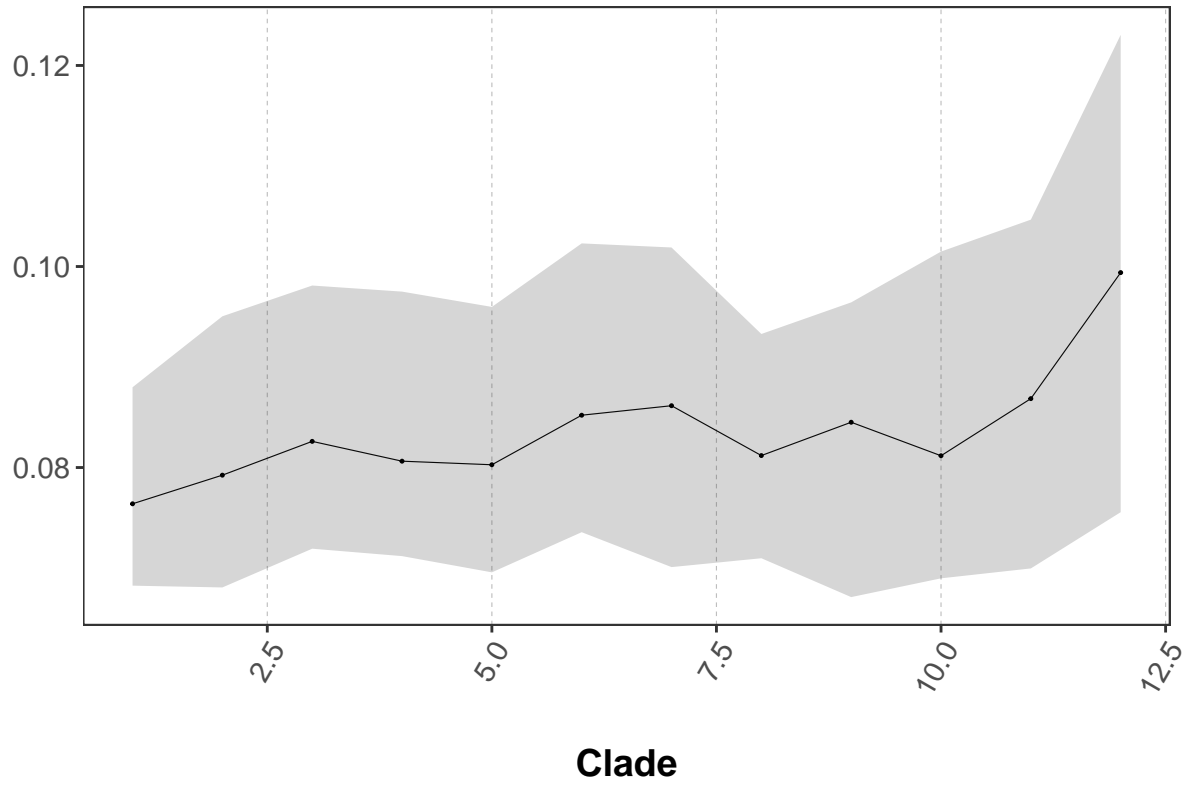

[[1]]

Table 7: Correlation between gene age and disorder in Drosophila

|     | species    | Kendall.tau | p.value   |
|-----|------------|-------------|-----------|
| tau | Drosophila | 0.6060606   | 0.0060899 |

## Arabidopsis

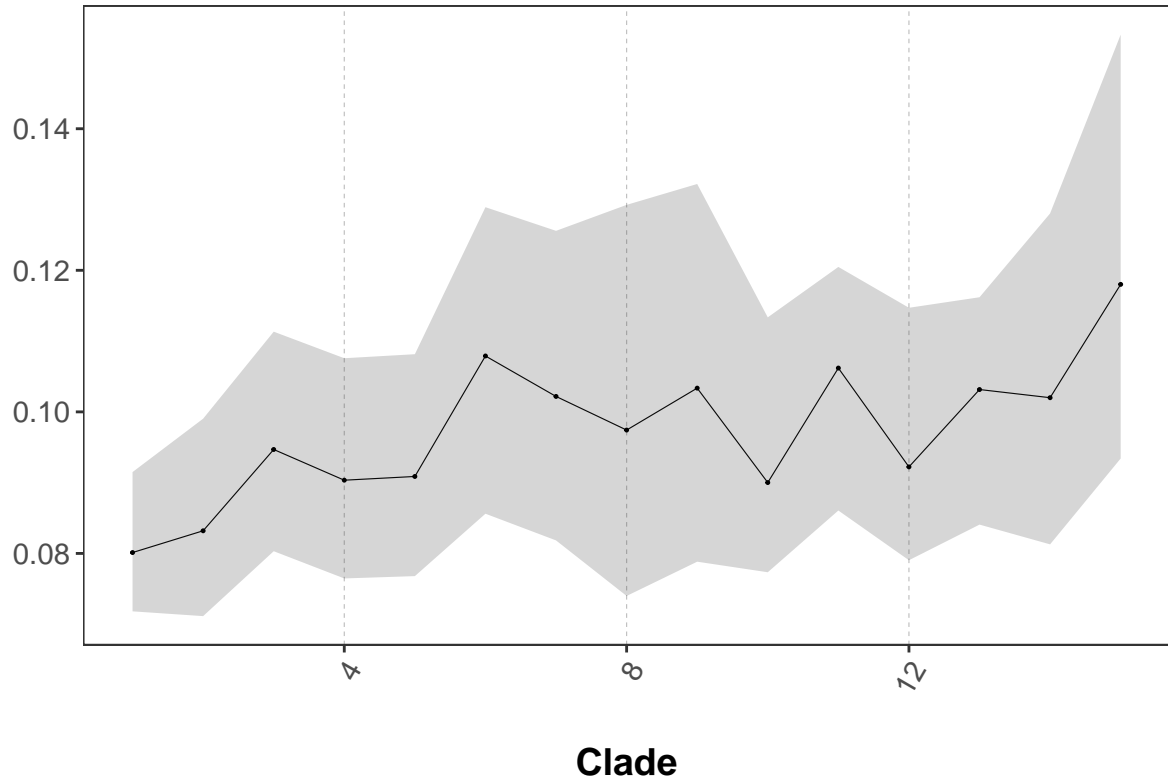

[[2]]

```
# estimating the correlations
stats.age.dis <- lapply(sum.dis.age, function(x) {
  cor.df <- cor.test(x$med.dis, x$Clade, method = "kendall", exact = FALSE)
  species <- unique(x$species)
  Kendall.tau <- cor.df$estimate
  p.value <- cor.df$p.value
  data.frame(species, Kendall.tau, p.value)
})

# showing the tables
for(i in stats.age.dis) {
  print(kable(x = i, caption = paste0("Correlation between gene age
                                     and disorder in ", unique(i$species))))
}
```

```
setwd("~/Dropbox/SupplementaryData_GeneAge/Co-factors_continuous/grapes_analysis/")
# change here to the respective folder where you keep the data

# calling all output tables
```

Table 8: Correlation between gene age and disorder in Arabidopsis

|     | species     | Kendall.tau | p.value   |
|-----|-------------|-------------|-----------|
| tau | Arabidopsis | 0.4666667   | 0.0153138 |

```

co.factors <- list.files(".", ".csv")

# reading each table into a list
tbl.list <- lapply(co.factors, read.table, header = TRUE)

# arranging the table for plotting:
tbl.list2 <- lapply(tbl.list, function(x) {
  melt(x, id.vars = c("GeneAge", "category", "co_factor", "species"),
       measure.vars = c("dnds", "omegaNA", "omegaA"))
})

# function to estimate the mean and standard deviation to plot the results with the
# mean of the bootstrap replicates and the 95% confidence interval
fun <- function(x){
  c(mean=mean(x), sd=sd(x))
}

# applying the above function to each output table for each value of each estimate
# (dnds, omegaA, omegaNA) for each value of the variable being analyzed for each species
tbl.sum <- lapply(tbl.list2, function(x) {
  summaryBy(value ~ variable + GeneAge + category + species + co_factor, data=x, FUN = fun)
})

# to change the estimate name to the respective symbol
tbl.sum2 <- lapply(tbl.sum, function(x) {
  dply(x, c("GeneAge", "category", "co_factor", "species"), function(y) {
    y$variable <- factor(y$variable, levels = c("dnds", "omegaNA", "omegaA"))
    levels(y$variable) <- c(expression(omega), expression(omega[na]),
                             expression(omega[a]))
  })
  return(y)
})
}

```

## Including Plots

In the next chunk the script to plot the results is represented. The same order will follow.

```

# plotting each of the output tables
plot.co_factors <- lapply(tbl.sum2, function(x) {
  ggplot(x, aes(x = GeneAge, y = value.mean, fill = category)) +
  geom_line(col = "black", size = 0.2)+
  geom_ribbon(aes(ymin=value.mean + 1.96*value.sd,
                ymax=value.mean - 1.96*value.sd, fill = category), alpha=0.6) +
  geom_point(size=.2)+
  facet_grid(species~variable, scales = "free_x", labeller = label_parsed) +
  ylab("") +

```

```

xlab("Gene Age") +
#scale_x_sqrt() +
scale_fill_grey() +
scale_color_grey() +
theme_bw() +
ggtitle(as.character(x$co_factor)) +
theme.plot()
})

```

plot.co\_factors

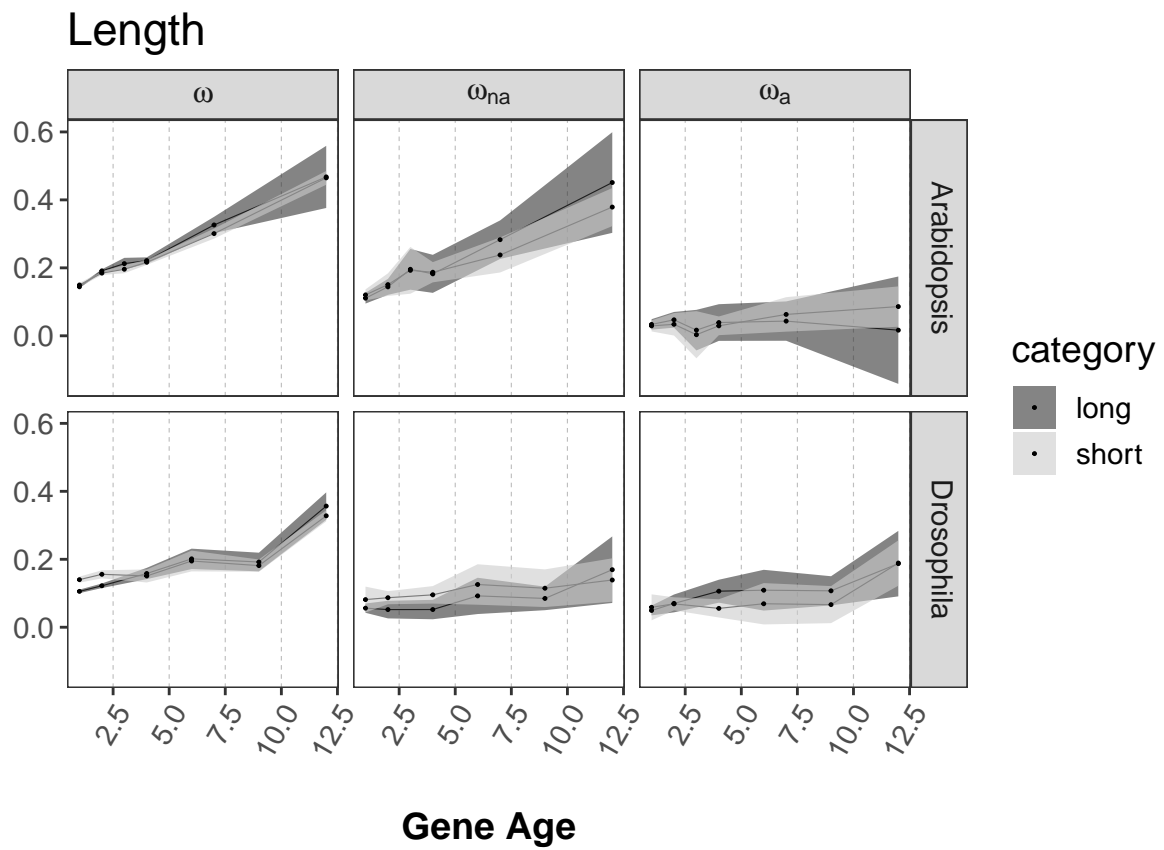

# Expression

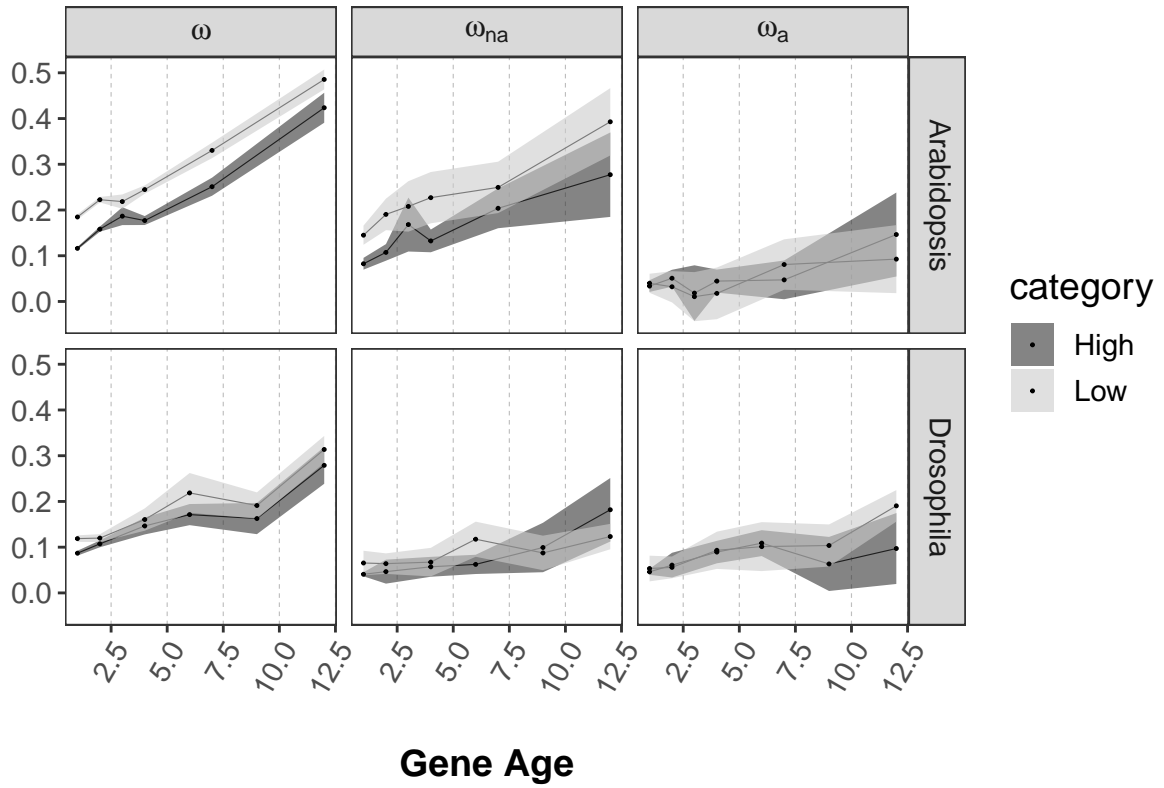



# RSA

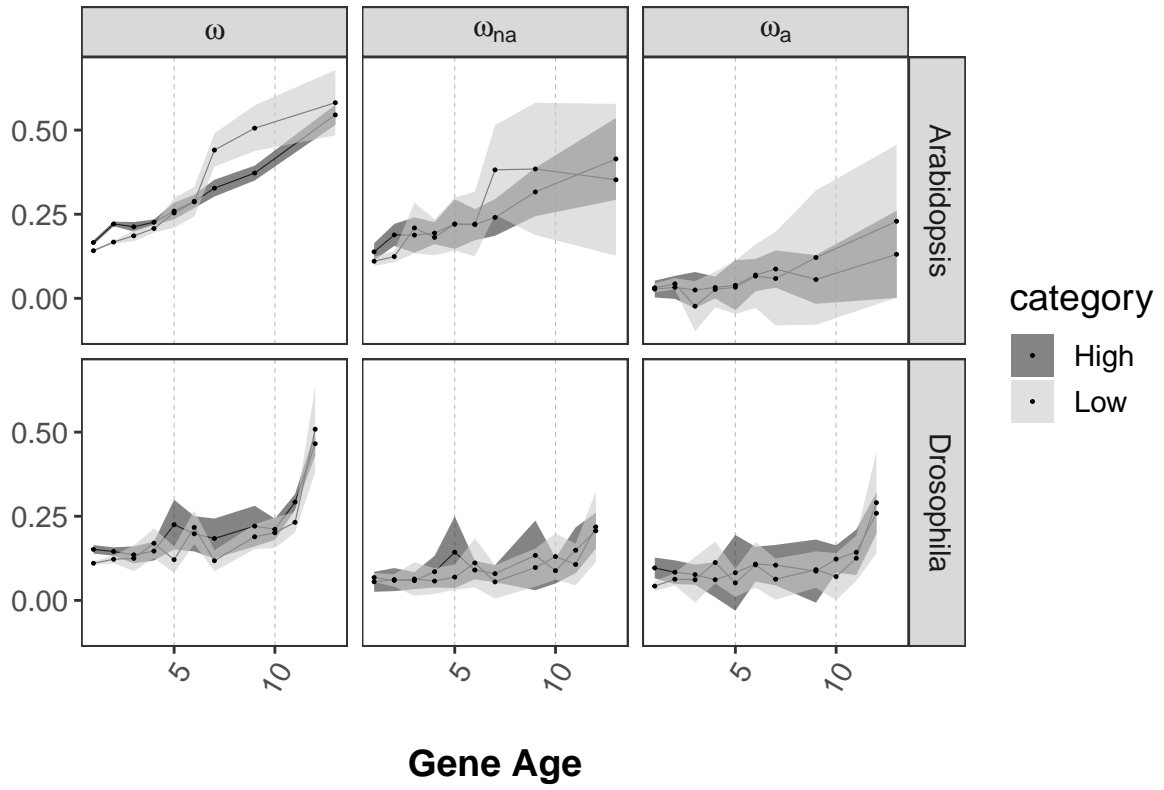

## Disorder

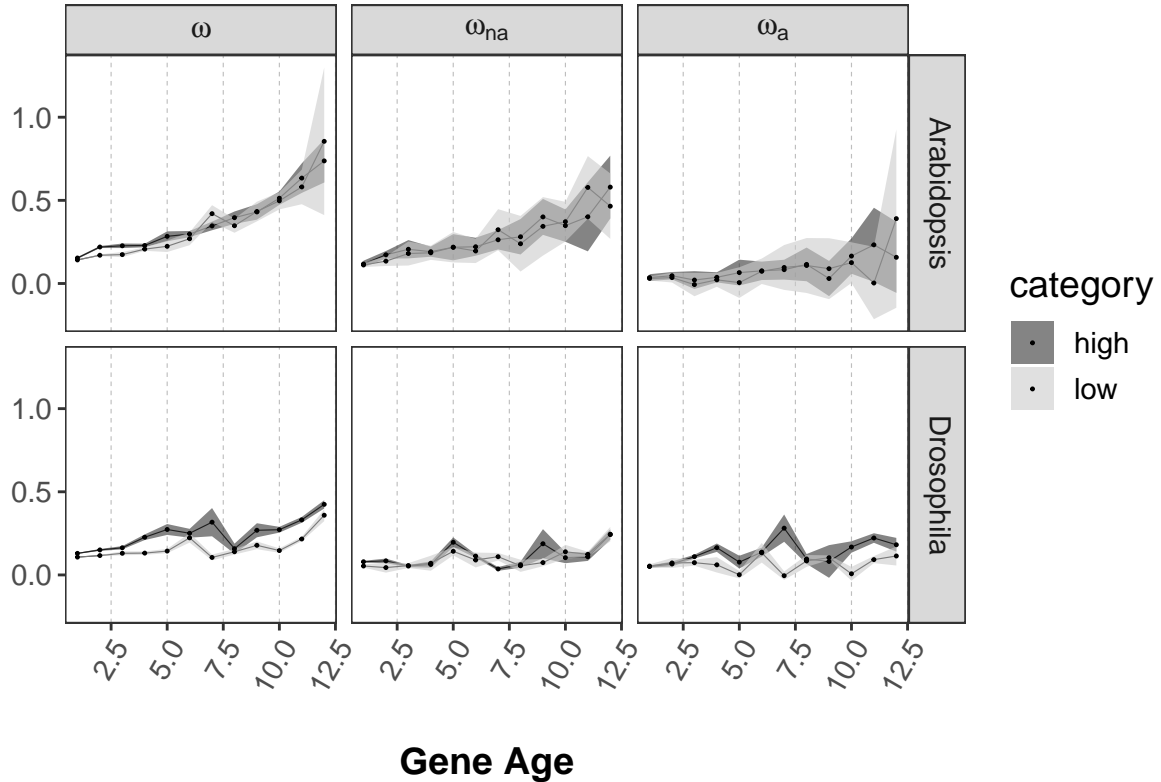

The last section shows how the statistical analyses were performed.

```
tbl.stat <- lapply(tbl.sum2, function(x) {
  ddply(x, c("co_factor", "species", "variable", "category"), function(x) {
    var <- as.numeric(factor(x$GeneAge))
    variable.value <- as.numeric(factor(x$value.mean))
    corr = cor.test(var, variable.value, method = "kendall", exact = FALSE)
    Kendall.tau = corr$estimate
    p.value = corr$p.value
    dat = data.frame(Kendall.tau, p.value)
  })
})

# showing the tables
for(i in tbl.stat) {
  print(kable(x = i, caption = paste0("Statistics for ", unique(i$co_factor))))
}
```

Table 9: Statistics for Length

| co_factor | species     | variable  | category | Kendall.tau | p.value   |
|-----------|-------------|-----------|----------|-------------|-----------|
| Length    | Arabidopsis | omega     | long     | 1.0000000   | 0.0048322 |
| Length    | Arabidopsis | omega     | short    | 1.0000000   | 0.0048322 |
| Length    | Arabidopsis | omega[na] | long     | 0.8666667   | 0.0145950 |
| Length    | Arabidopsis | omega[na] | short    | 0.8666667   | 0.0145950 |
| Length    | Arabidopsis | omega[a]  | long     | -0.2000000  | 0.5730251 |
| Length    | Arabidopsis | omega[a]  | short    | 0.6000000   | 0.0908739 |
| Length    | Drosophila  | omega     | long     | 0.8666667   | 0.0145950 |
| Length    | Drosophila  | omega     | short    | 0.7333333   | 0.0387775 |
| Length    | Drosophila  | omega[na] | long     | 0.6000000   | 0.0908739 |
| Length    | Drosophila  | omega[na] | short    | 0.8666667   | 0.0145950 |
| Length    | Drosophila  | omega[a]  | long     | 0.8666667   | 0.0145950 |
| Length    | Drosophila  | omega[a]  | short    | 0.4666667   | 0.1884860 |

Table 10: Statistics for Expression

| co_factor  | species     | variable  | category | Kendall.tau | p.value   |
|------------|-------------|-----------|----------|-------------|-----------|
| Expression | Arabidopsis | omega     | High     | 0.8666667   | 0.0145950 |
| Expression | Arabidopsis | omega     | Low      | 0.8666667   | 0.0145950 |
| Expression | Arabidopsis | omega[na] | High     | 0.8666667   | 0.0145950 |
| Expression | Arabidopsis | omega[na] | Low      | 1.0000000   | 0.0048322 |
| Expression | Arabidopsis | omega[a]  | High     | 0.4666667   | 0.1884860 |
| Expression | Arabidopsis | omega[a]  | Low      | 0.3333333   | 0.3475580 |
| Expression | Drosophila  | omega     | High     | 0.8666667   | 0.0145950 |
| Expression | Drosophila  | omega     | Low      | 0.8666667   | 0.0145950 |
| Expression | Drosophila  | omega[na] | High     | 1.0000000   | 0.0048322 |
| Expression | Drosophila  | omega[na] | Low      | 0.7333333   | 0.0387775 |
| Expression | Drosophila  | omega[a]  | High     | 0.6000000   | 0.0908739 |
| Expression | Drosophila  | omega[a]  | Low      | 1.0000000   | 0.0048322 |

Table 11: Statistics for RSA

| co_factor | species     | variable  | category | Kendall.tau | p.value   |
|-----------|-------------|-----------|----------|-------------|-----------|
| RSA       | Arabidopsis | omega     | High     | 0.9444444   | 0.0003930 |
| RSA       | Arabidopsis | omega     | Low      | 1.0000000   | 0.0001746 |
| RSA       | Arabidopsis | omega[na] | High     | 0.8888889   | 0.0008492 |
| RSA       | Arabidopsis | omega[na] | Low      | 0.7777778   | 0.0035093 |
| RSA       | Arabidopsis | omega[a]  | High     | 0.7222222   | 0.0067144 |
| RSA       | Arabidopsis | omega[a]  | Low      | 0.6666667   | 0.0123434 |
| RSA       | Drosophila  | omega     | High     | 0.6363636   | 0.0064351 |
| RSA       | Drosophila  | omega     | Low      | 0.6363636   | 0.0064351 |
| RSA       | Drosophila  | omega[na] | High     | 0.6727273   | 0.0039711 |
| RSA       | Drosophila  | omega[na] | Low      | 0.4909091   | 0.0355579 |
| RSA       | Drosophila  | omega[a]  | High     | 0.5636364   | 0.0158068 |
| RSA       | Drosophila  | omega[a]  | Low      | 0.5636364   | 0.0158068 |

Table 12: Statistics for Disorder

| co_factor | species     | variable  | category | Kendall.tau | p.value   |
|-----------|-------------|-----------|----------|-------------|-----------|
| Disorder  | Arabidopsis | omega     | high     | 1.0000000   | 0.0000060 |
| Disorder  | Arabidopsis | omega     | low      | 0.9696970   | 0.0000114 |
| Disorder  | Arabidopsis | omega[na] | high     | 0.9393939   | 0.0000212 |
| Disorder  | Arabidopsis | omega[na] | low      | 0.9090909   | 0.0000388 |
| Disorder  | Arabidopsis | omega[a]  | high     | 0.6363636   | 0.0039762 |
| Disorder  | Arabidopsis | omega[a]  | low      | 0.4545455   | 0.0396693 |
| Disorder  | Drosophila  | omega     | high     | 0.6969697   | 0.0016086 |
| Disorder  | Drosophila  | omega     | low      | 0.6363636   | 0.0039762 |
| Disorder  | Drosophila  | omega[na] | high     | 0.3030303   | 0.1702344 |
| Disorder  | Drosophila  | omega[na] | low      | 0.5757576   | 0.0091672 |
| Disorder  | Drosophila  | omega[a]  | high     | 0.5151515   | 0.0197288 |
| Disorder  | Drosophila  | omega[a]  | low      | 0.2727273   | 0.2170890 |
