# Supplementary material for: Strong evidence for the adaptive walk model of gene evolution in Drosophila and Arabidopsis
Source: PubMed Central journal article supplement (PMC9470001; doi:10.1371/journal.pbio.3001775), 2022-09-13
Supplement: pbio.3001775.s055.pdf [file pbio.3001775.s055.pdf]

# Gene Age Analysis

ky\_dutheil

28/05/2022

This script includes extra analyses to correct for intra-category variation of the cofactors.

```
# libraries
library(plyr)
library(kableExtra)
#

d.len <- read.table("~/Dropbox/SupplementaryData_GeneAge/IntraClassVariation/S16_Data.csv",
                    header=T)
d.exp <- read.table("~/Dropbox/SupplementaryData_GeneAge/IntraClassVariation/S17_Data.csv",
                    header=T)
d.dis <- read.table("~/Dropbox/SupplementaryData_GeneAge/IntraClassVariation/S15_Data.csv",
                    header=T)
d.rsa <- read.table("~/Dropbox/SupplementaryData_GeneAge/IntraClassVariation/S14_Data.csv",
                    header=T)
```

## Co-factor ~ omegas

```
# RSA
stats_rsa <- ddply(d.rsa, c("species", "category", "variable"), function(x) {
  cor_test <- cor.test(x$value, x$mean.rsa, method = "kendall", exact = F)
  estimate <- cor_test$estimate
  p_value <- cor_test$p.value
  data.frame(estimate, p_value)
})
kable(stats_rsa, caption = "Correlation between RSA and rates of
protein evolution in each high and low group")
```

```
# Disorder
stats_dis <- ddply(d.dis, c("species", "category", "variable"), function(x) {
  cor_test <- cor.test(x$value, x$mean.dis, method = "kendall", exact = F)
  estimate <- cor_test$estimate
  p_value <- cor_test$p.value
  data.frame(estimate, p_value)
})
kable(stats_dis, caption = "Correlation between protein disorder and rates of
protein evolution in each high and low group")
```

Table 1: Correlation between RSA and rates of protein evolution in each high and low group

| species     | category | variable | estimate  | p_value   |
|-------------|----------|----------|-----------|-----------|
| Arabidopsis | High     | mean_o   | 0.6666667 | 0.0123434 |
| Arabidopsis | High     | mean_oA  | 0.6666667 | 0.0123434 |
| Arabidopsis | High     | mean_oNA | 0.6111111 | 0.0218101 |
| Arabidopsis | Low      | mean_o   | 0.5000000 | 0.0605689 |
| Arabidopsis | Low      | mean_oA  | 0.2777778 | 0.2971465 |
| Arabidopsis | Low      | mean_oNA | 0.5000000 | 0.0605689 |
| Drosophila  | High     | mean_o   | 0.5272727 | 0.0239677 |
| Drosophila  | High     | mean_oA  | 0.4545455 | 0.0516250 |
| Drosophila  | High     | mean_oNA | 0.7090909 | 0.0023962 |
| Drosophila  | Low      | mean_o   | 0.2363636 | 0.3115148 |
| Drosophila  | Low      | mean_oA  | 0.3818182 | 0.1020810 |
| Drosophila  | Low      | mean_oNA | 0.0909091 | 0.6970916 |

Table 2: Correlation between protein disorder and rates of protein evolution in each high and low group

| species     | category | variable | estimate   | p_value   |
|-------------|----------|----------|------------|-----------|
| Arabidopsis | high     | mean_o   | 0.7575758  | 0.0006066 |
| Arabidopsis | high     | mean_oA  | 0.3939394  | 0.0746048 |
| Arabidopsis | high     | mean_oNA | 0.8181818  | 0.0002131 |
| Arabidopsis | low      | mean_o   | 0.1515152  | 0.4928862 |
| Arabidopsis | low      | mean_oA  | -0.1212121 | 0.5832934 |
| Arabidopsis | low      | mean_oNA | 0.1515152  | 0.4928862 |
| Drosophila  | high     | mean_o   | 0.3636364  | 0.0998171 |
| Drosophila  | high     | mean_oA  | 0.2424242  | 0.2725711 |
| Drosophila  | high     | mean_oNA | 0.3939394  | 0.0746048 |
| Drosophila  | low      | mean_o   | -0.1515152 | 0.4928862 |
| Drosophila  | low      | mean_oA  | -0.0303030 | 0.8909161 |
| Drosophila  | low      | mean_oNA | -0.1515152 | 0.4928862 |

Table 3: Correlation between gene length and rates of protein evolution in each high and low group

| species     | category | variable | estimate   | p_value   |
|-------------|----------|----------|------------|-----------|
| Arabidopsis | long     | mean_o   | -0.7333333 | 0.0387775 |
| Arabidopsis | long     | mean_oA  | 0.2000000  | 0.5730251 |
| Arabidopsis | long     | mean_oNA | -0.6000000 | 0.0908739 |
| Arabidopsis | short    | mean_o   | -1.0000000 | 0.0048322 |
| Arabidopsis | short    | mean_oA  | -0.6000000 | 0.0908739 |
| Arabidopsis | short    | mean_oNA | -0.8666667 | 0.0145950 |
| Drosophila  | long     | mean_o   | -0.0666667 | 0.8509807 |
| Drosophila  | long     | mean_oA  | -0.0666667 | 0.8509807 |
| Drosophila  | long     | mean_oNA | -0.3333333 | 0.3475580 |
| Drosophila  | short    | mean_o   | -0.7333333 | 0.0387775 |
| Drosophila  | short    | mean_oA  | -0.4666667 | 0.1884860 |
| Drosophila  | short    | mean_oNA | -0.8666667 | 0.0145950 |

```
# Disorder
stats_length <- ddply(d.len, c("species", "category", "variable"), function(x) {
  cor_test <- cor.test(x$value, x$mean.length, method = "kendall", exact = F)
  estimate <- cor_test$estimate
  p_value <- cor_test$p.value
  data.frame(estimate, p_value)
})
kable(stats_length, caption = "Correlation between gene length and rates of
protein evolution in each high and low group")
```

```
# Expression
stats_exp <- ddply(d.exp, c("species", "category", "variable"), function(x) {
  cor_test <- cor.test(x$value, x$mean.exp, method = "kendall", exact = F)
  estimate <- cor_test$estimate
  p_value <- cor_test$p.value
  data.frame(estimate, p_value)
})
kable(stats_exp, caption = "Correlation between gene expression and rates of
protein evolution in each high and low group")
```

## Co-factor ~ Gene age

```
co_factor_age <- read.table(file = "~/Dropbox/SupplementaryData_GeneAge/IntraClassVariation/S18_Data.csv",
  sep = "\t", header = T)

cor_df <- ddply(co_factor_age, c("species", "co_factor", "category"), function(x) {
  cor_tbl <- cor.test(x$Clade, x$median_value, method = "kendall", exact = F)
  tau <- cor_tbl$estimate
  p_value <- cor_tbl$p.value
  data.frame(tau, p_value)
})
```

Table 4: Correlation between gene expression and rates of protein evolution in each high and low group

| species     | category | variable | estimate   | p_value   |
|-------------|----------|----------|------------|-----------|
| Arabidopsis | High     | mean_o   | 0.0666667  | 0.8509807 |
| Arabidopsis | High     | mean_oA  | 0.2000000  | 0.5730251 |
| Arabidopsis | High     | mean_oNA | 0.0666667  | 0.8509807 |
| Arabidopsis | Low      | mean_o   | -0.8666667 | 0.0145950 |
| Arabidopsis | Low      | mean_oA  | -0.3333333 | 0.3475580 |
| Arabidopsis | Low      | mean_oNA | -1.0000000 | 0.0048322 |
| Drosophila  | High     | mean_o   | -0.2000000 | 0.5730251 |
| Drosophila  | High     | mean_oA  | -0.4666667 | 0.1884860 |
| Drosophila  | High     | mean_oNA | -0.0666667 | 0.8509807 |
| Drosophila  | Low      | mean_o   | -0.6000000 | 0.0908739 |
| Drosophila  | Low      | mean_oA  | -0.7333333 | 0.0387775 |
| Drosophila  | Low      | mean_oNA | -0.7333333 | 0.0387775 |

Table 5: Correlation between the co-factor and gene age in each high and low group

| species     | co_factor  | category | tau        | p_value   |
|-------------|------------|----------|------------|-----------|
| Arabidopsis | Disorder   | high     | 0.5047619  | 0.0087205 |
| Arabidopsis | Disorder   | low      | 0.2000000  | 0.2986976 |
| Arabidopsis | Expression | high     | -0.0956949 | 0.6202622 |
| Arabidopsis | Expression | low      | -0.8421149 | 0.0000130 |
| Arabidopsis | Length     | long     | -0.7904762 | 0.0000400 |
| Arabidopsis | Length     | short    | -0.3942490 | 0.0419555 |
| Arabidopsis | RSA        | high     | 0.5428571  | 0.0047909 |
| Arabidopsis | RSA        | low      | 0.6380952  | 0.0009143 |
| Drosophila  | Disorder   | high     | 0.4545455  | 0.0396693 |
| Drosophila  | Disorder   | low      | -0.4242424 | 0.0548539 |
| Drosophila  | Expression | high     | -0.2595495 | 0.2426117 |
| Drosophila  | Expression | low      | -0.4187179 | 0.0622294 |
| Drosophila  | Length     | long     | -0.3636364 | 0.0998171 |
| Drosophila  | Length     | short    | -0.4545455 | 0.0396693 |
| Drosophila  | RSA        | high     | 0.7575758  | 0.0006066 |
| Drosophila  | RSA        | low      | 0.4848485  | 0.0282123 |

```
kable(cor_df, caption = "Correlation between the co-factor and gene age in each high
and low group")
```

The following chunks contain the linear model analyses.

## Model fitting

Fit linear models with intra-category co-factor values as explanatory variables, together with some interactions, including:

- Co-factor nested within category (category + category:cofactor)
- Gene age with category
- Gene age with species

## Omega

```
m.len.o <- step(lm(value ~ GeneAge + species + GeneAge:species +
                  category + mean.length:category + GeneAge:category,
                  d.len, subset = variable == "mean_o"))
m.exp.o <- step(lm(value ~ GeneAge + species + GeneAge:species +
                  category + mean.exp:category + GeneAge:category,
                  d.exp, subset = variable == "mean_o"))
m.dis.o <- step(lm(value ~ GeneAge + species + GeneAge:species +
                  category + mean.dis:category + GeneAge:category,
                  d.dis, subset = variable == "mean_o"))
m.rsa.o <- step(lm(value ~ GeneAge + species + GeneAge:species +
                  category + mean.rsa:category + GeneAge:category,
                  d.rsa, subset = variable == "mean_o"))
```

## OmegaA

```
m.len.oa <- step(lm(value ~ GeneAge + species + GeneAge:species +
                    category + mean.length:category + GeneAge:category,
                    d.len, subset = variable == "mean_oA"))
m.exp.oa <- step(lm(value ~ GeneAge + species + GeneAge:species +
                    category + mean.exp:category + GeneAge:category,
                    d.exp, subset = variable == "mean_oA"))
m.dis.oa <- step(lm(value ~ GeneAge + species + GeneAge:species +
                    category + mean.dis:category + GeneAge:category,
                    d.dis, subset = variable == "mean_oA"))
m.rsa.oa <- step(lm(value ~ GeneAge + species + GeneAge:species +
                    category + mean.rsa:category + GeneAge:category,
                    d.rsa, subset = variable == "mean_oA"))
```

## OmegaNA

```
m.len.ona <- step(lm(value ~ GeneAge + species + GeneAge:species +
                    category + mean.length:category + GeneAge:category,
                    d.len, subset = variable == "mean_oNA"))
m.exp.ona <- step(lm(value ~ GeneAge + species + GeneAge:species +
                    category + mean.exp:category + GeneAge:category,
                    d.exp, subset = variable == "mean_oNA"))
m.dis.ona <- step(lm(value ~ GeneAge + species + GeneAge:species +
                    category + mean.dis:category + GeneAge:category,
                    d.dis, subset = variable == "mean_oNA"))
m.rsa.ona <- step(lm(value ~ GeneAge + species + GeneAge:species +
                    category + mean.rsa:category + GeneAge:category,
                    d.rsa, subset = variable == "mean_oNA"))
```

## Diagnostic plots

```
getdf <- function(m, var.name) {  
  df <- data.frame(Variable = var.name, Fitted = fitted(m), Residuals = residuals(m))  
  return(df)  
}  
  
getdf.all <- function(m.len, m.exp, m.dis, m.rsa) {  
  df.len <- getdf(m.len, "Gene length")  
  df.exp <- getdf(m.exp, "Gene expression")  
  df.dis <- getdf(m.dis, "Protein disorder")  
  df.rsa <- getdf(m.rsa, "Relative solvent accessibility")  
  df <- rbind(df.len, df.exp, df.dis, df.rsa)  
}  
  
library(ggplot2)  
library(ggpubr)
```

```
##  
## Attaching package: 'ggpubr'  
  
## The following object is masked from 'package:plyr':  
##  
## mutate
```

## Omega

Histograms of residuals:

```
dat.o <- getdf.all(m.len.o, m.exp.o, m.dis.o, m.rsa.o)  
p.dist.o <- ggplot(dat.o) +  
  geom_histogram(aes(x = Residuals, y = ..density..), bins = 20) +  
  facet_wrap(~Variable) +  
  theme_pubclean()  
p.dist.o
```

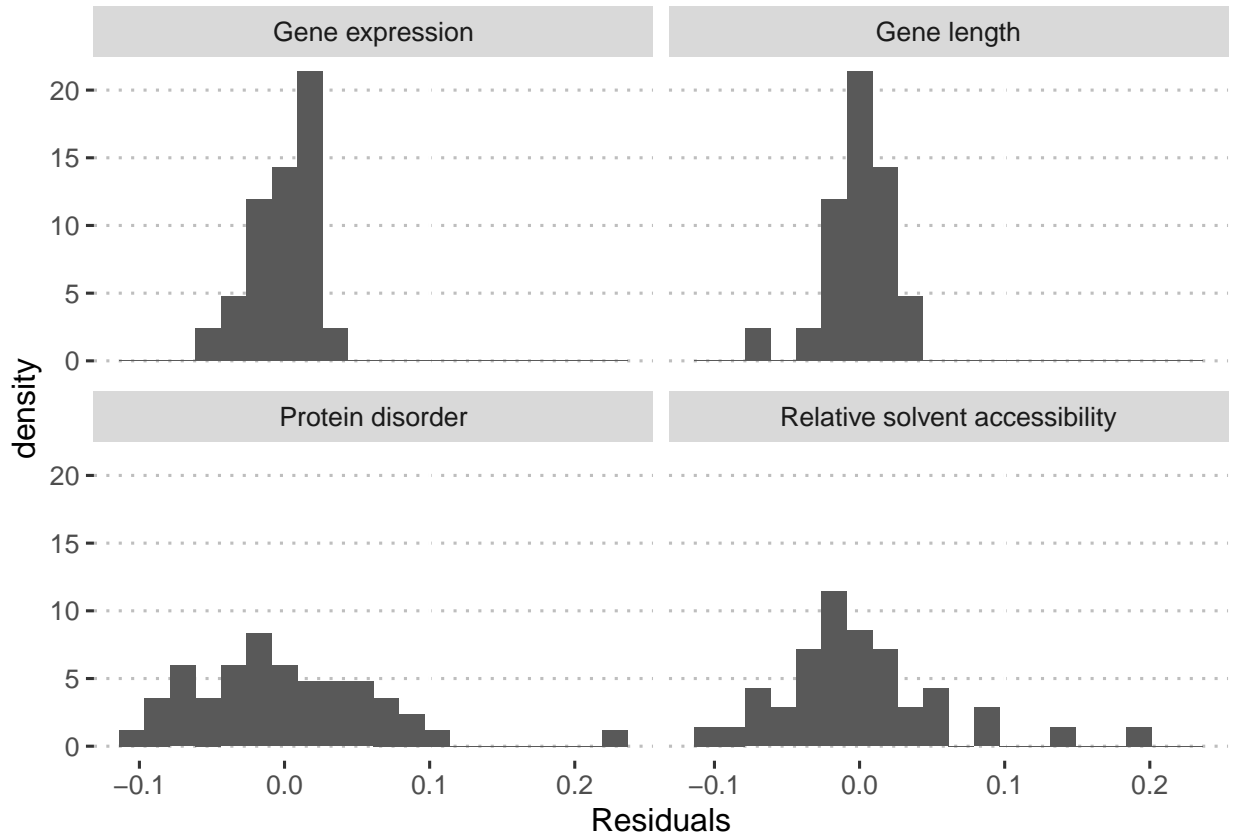

Quantile-quantile plots:

```
p.qq.o <- ggplot(dat.o) +
  geom_qq(aes(sample = Residuals)) +
  geom_qq_line(aes(sample = Residuals), col = "orange") +
  facet_wrap(~Variable) +
  theme_pubclean()
p.qq.o
```

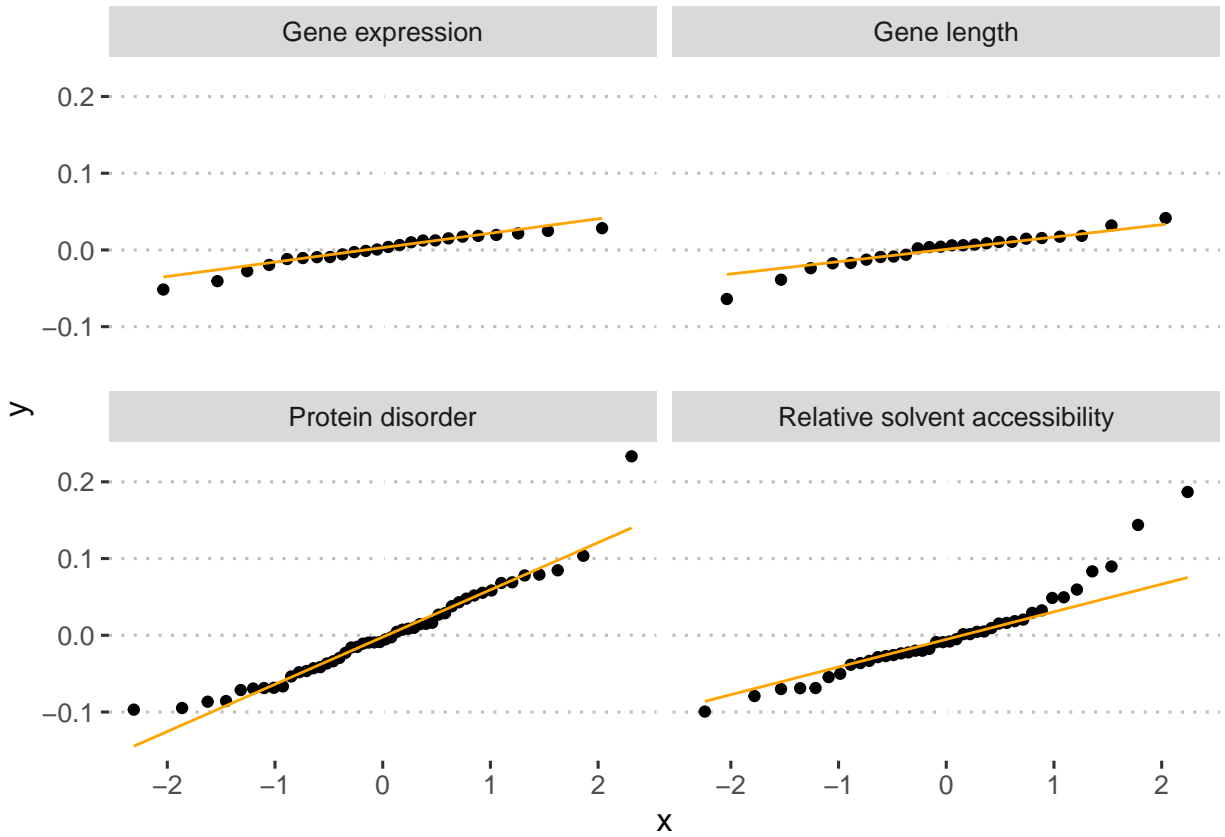

Residuals vs. predicted plots:

```
p.pred.o <- ggplot(dat.o) +
  geom_point(aes(y = Residuals, x = Fitted)) +
  geom_hline(yintercept = 0, col = "orange") +
  facet_wrap(~Variable) +
  theme_pubclean()
p.pred.o
```



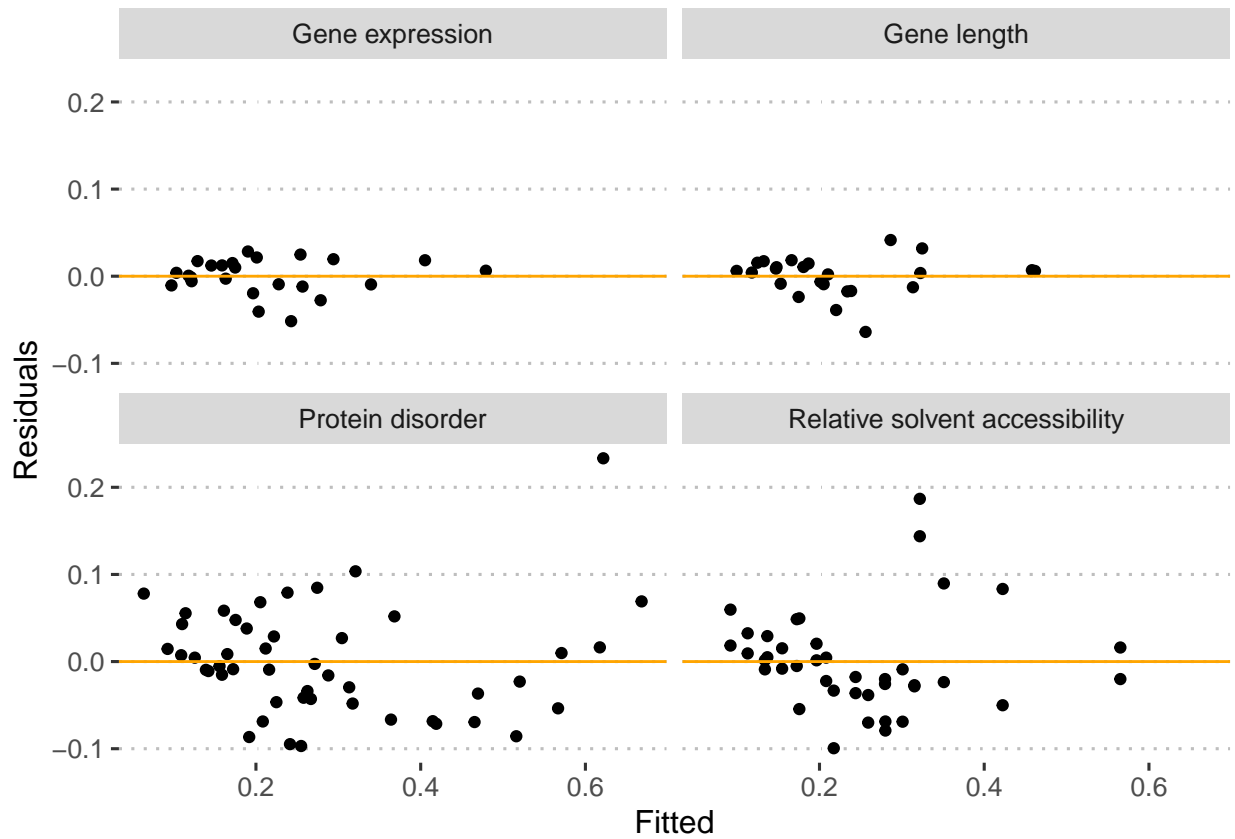

## OmegaA

Histograms of residuals:

```
dat.oa <- getdf.all(m.len.oa, m.exp.oa, m.dis.oa, m.rsa.oa)
p.dist.oa <- ggplot(dat.oa) +
  geom_histogram(aes(x = Residuals, y = ..density..), bins = 20) +
  facet_wrap(~Variable) +
  theme_pubclean()
p.dist.oa
```

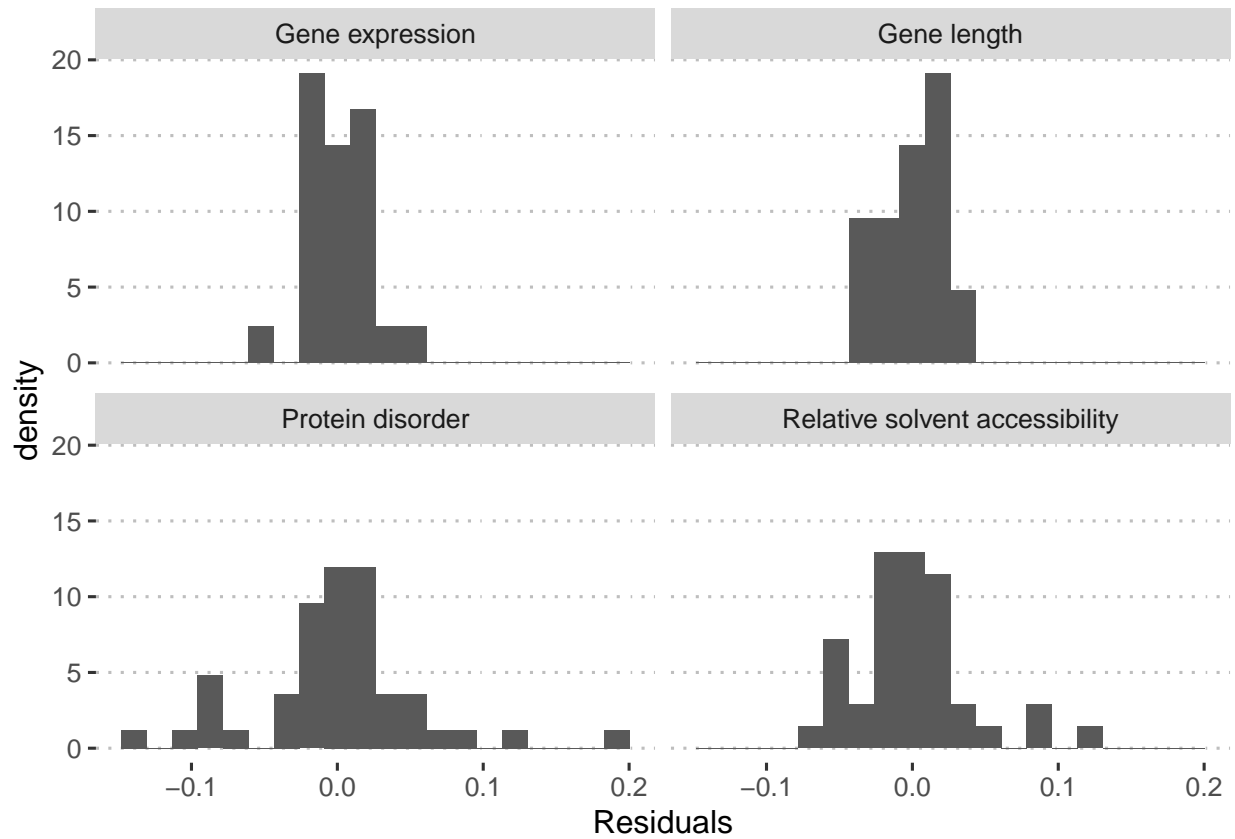

Quantile-quantile plots:

```
p.qq.oa <- ggplot(dat.oa) +
  geom_qq(aes(sample = Residuals)) +
  geom_qq_line(aes(sample = Residuals), col = "orange") +
  facet_wrap(~Variable) +
  theme_pubclean()
p.qq.oa
```

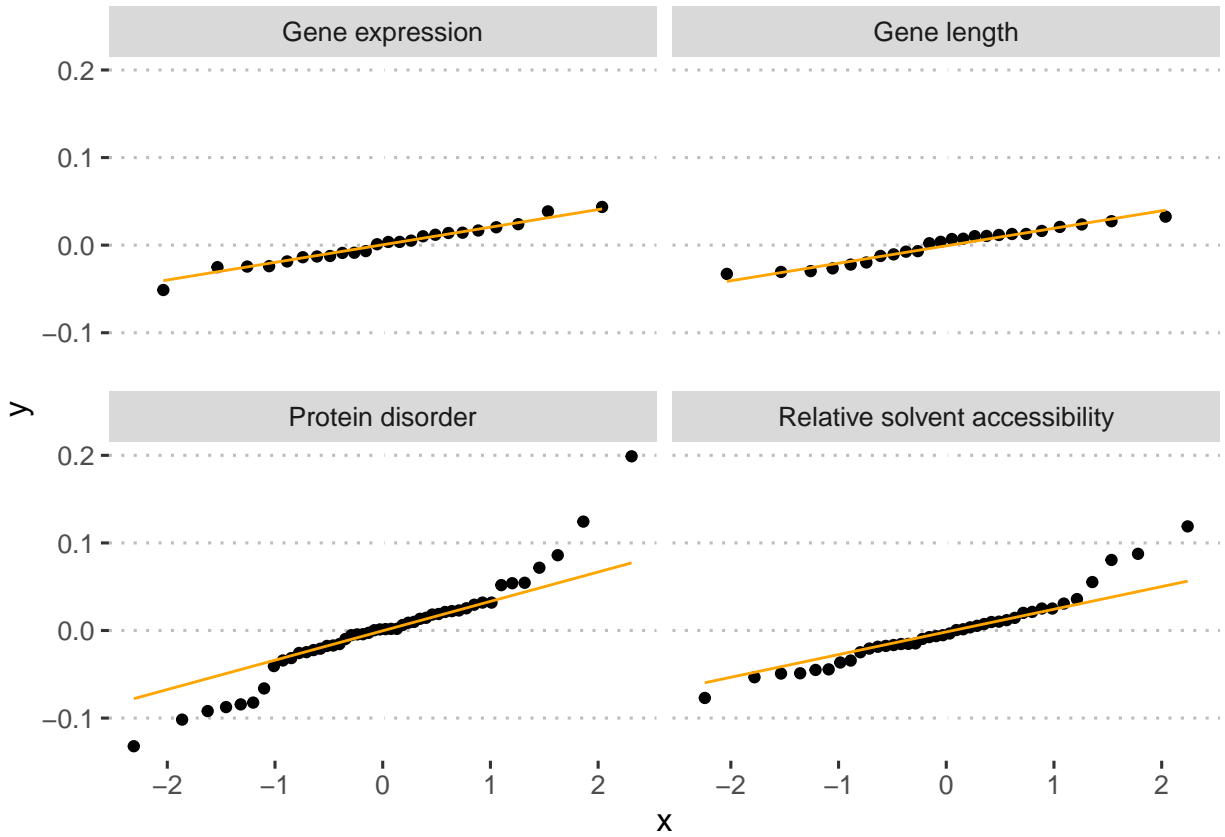

Residuals vs. predicted plots:

```
p.pred.oa <- ggplot(dat.oa) +
  geom_point(aes(y = Residuals, x = Fitted)) +
  geom_hline(yintercept = 0, col = "orange") +
  facet_wrap(~Variable) +
  theme_pubclean()
p.pred.oa
```

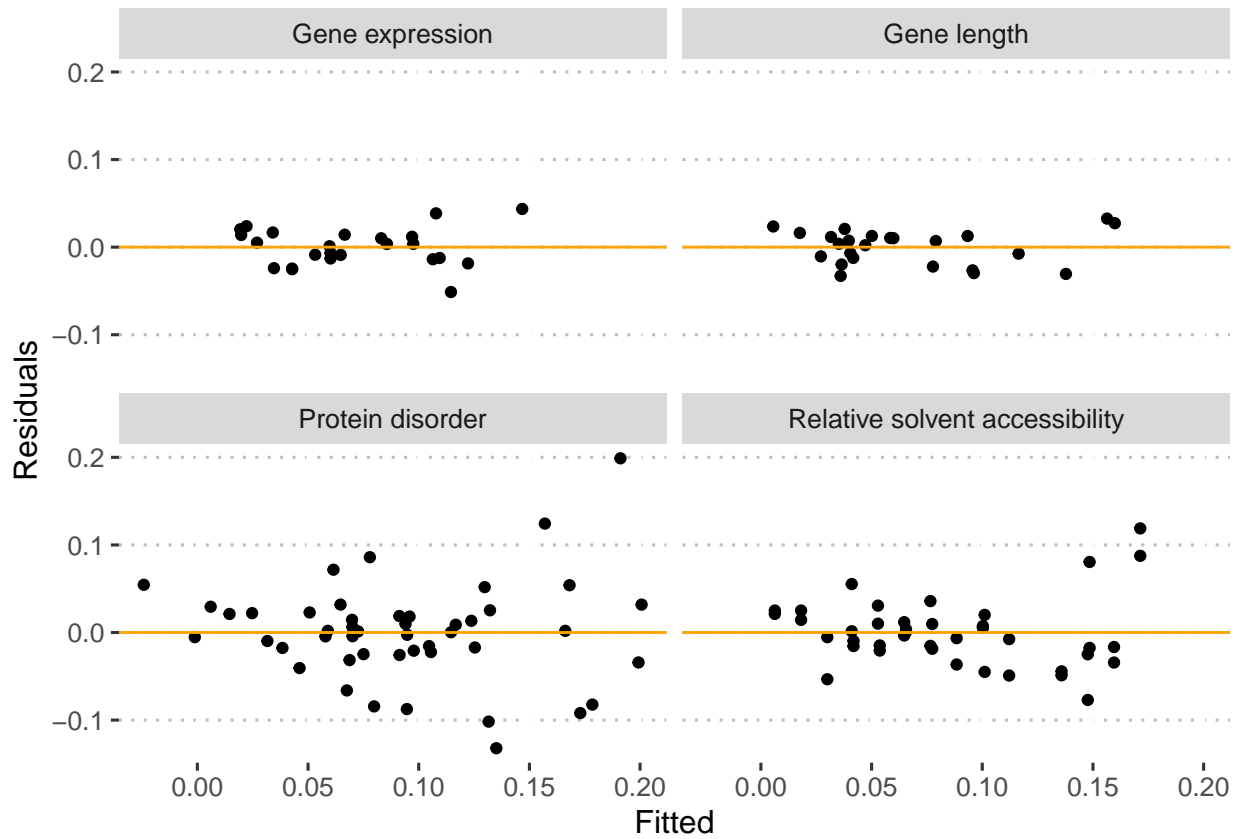

## OmegaNA

Histograms of residuals:

```
dat.ona <- getdf.all(m.len.ona, m.exp.ona, m.dis.ona, m.rsa.ona)
p.dist.ona <- ggplot(dat.ona) +
  geom_histogram(aes(x = Residuals, y = ..density..), bins = 20) +
  facet_wrap(~Variable) +
  theme_pubclean()
p.dist.ona
```

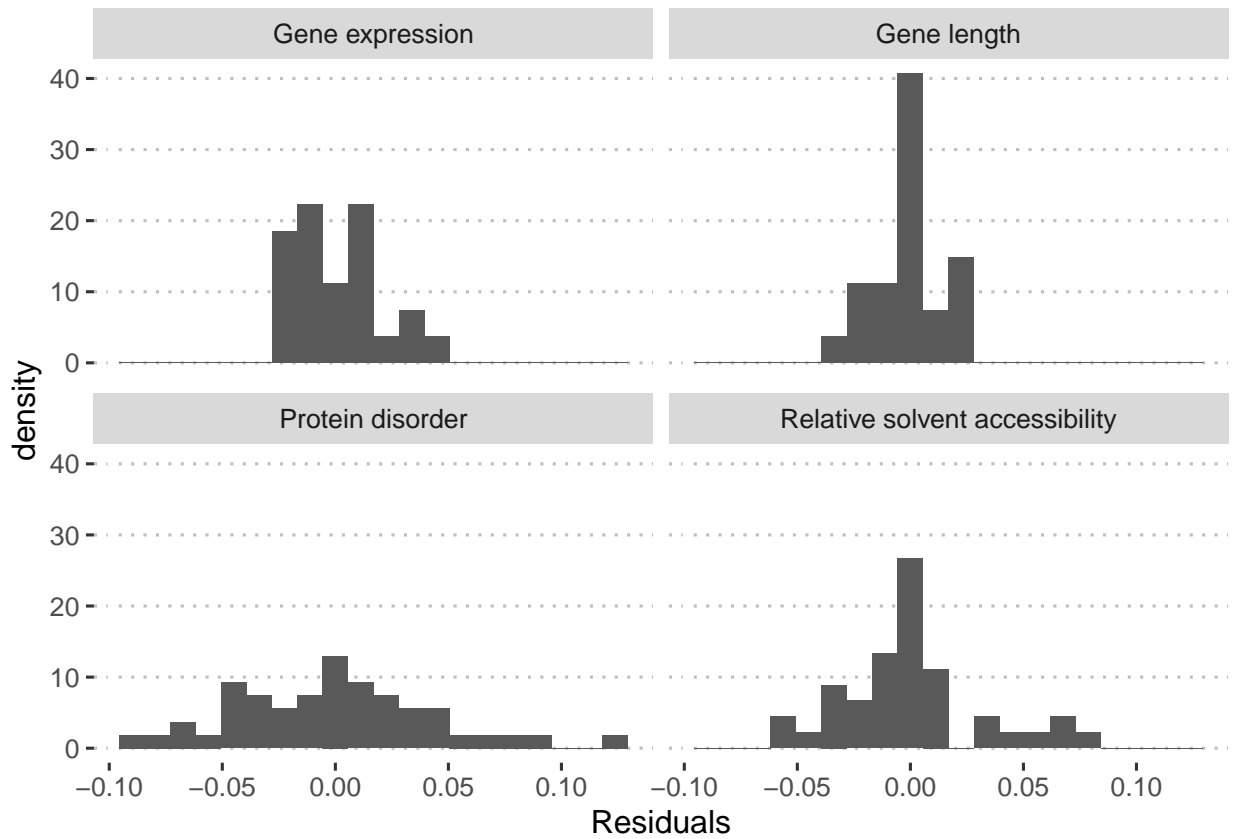

Quantile-quantile plots:

```
p.qq.ona <- ggplot(dat.ona) +
  geom_qq(aes(sample = Residuals)) +
  geom_qq_line(aes(sample = Residuals), col = "orange") +
  facet_wrap(~Variable) +
  theme_pubclean()
p.qq.ona
```

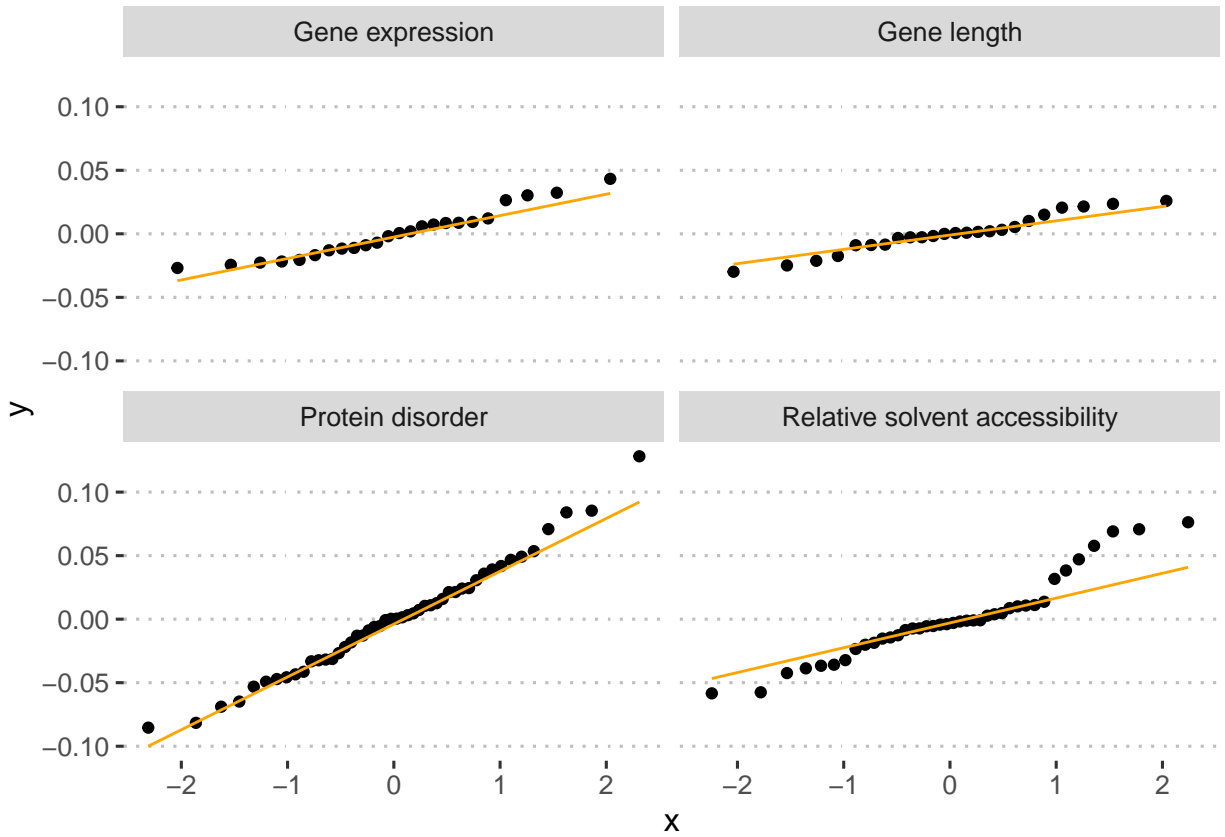

Residuals vs. predicted plots:

```
p.pred.ona <- ggplot(dat.ona) +
  geom_point(aes(y = Residuals, x = Fitted)) +
  geom_hline(yintercept = 0, col = "orange") +
  facet_wrap(~Variable) +
  theme_pubclean()
p.pred.ona
```

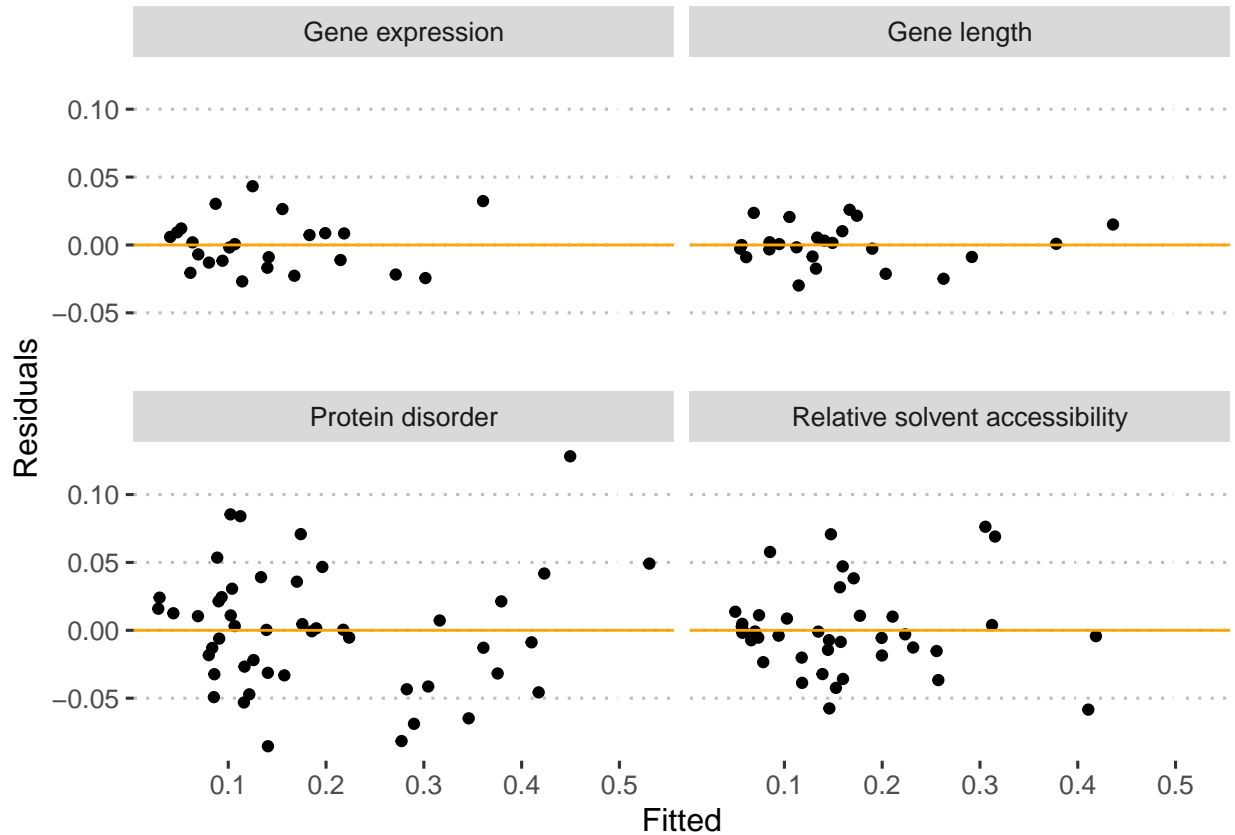

## Summarize results

### Utility functions

```
# From gtools:
stars.pval <- function(p.value) {
  unclass(
    symnum(p.value, corr = FALSE, na = FALSE,
           cutpoints = c(0, 0.001, 0.01, 0.05, 0.1, 1),
           symbols = c("***", "**", "*", "(", ""))
  )
}

getres<-function(m, type) {
  s<-summary(m)
  df<-as.data.frame(s$coefficients[,c(1,4)])
  df$Pvalue <- stars.pval(df[,2])
  colnames(df) <- paste(colnames(df), type, sep = "")
  df$Variable <- row.names(df)
  row.names(df) <- NULL
  df <- df[,c(4, 1, 2, 3)]
  return(df)
}
```

```

getres.all<-function(m.o, m.oa, m.ona, var.name) {
  df.o <- getres(m.o, ".omega")
  df.oa <- getres(m.oa, ".omegaA")
  df.ona <- getres(m.ona, ".omegaNA")
  df <- merge(df.o, df.oa, by = "Variable", all = TRUE, sort = FALSE)
  df <- merge(df, df.ona, by = "Variable", all = TRUE, sort = FALSE)
  df$Cofactor <- var.name
  return(df)
}

```

## Gather results

```

df.len <- getres.all(m.len.o, m.len.oa, m.len.ona, "Gene length")
df.exp <- getres.all(m.exp.o, m.exp.oa, m.exp.ona, "Gene expression")
df.dis <- getres.all(m.dis.o, m.dis.oa, m.dis.ona, "Protein disorder")
df.rsa <- getres.all(m.rsa.o, m.rsa.oa, m.rsa.ona, "Relative solvent accessibility")
df <- rbind(df.len, df.exp, df.dis, df.rsa)
df <- df[, c(11, 1:10)]
write.csv(df, "ModelResults.csv")

```
