# Supplementary material for: Strong evidence for the adaptive walk model of gene evolution in Drosophila and Arabidopsis
Source: PLoS Biol. 2022 Sep 13;20(9):e3001775. doi: 10.1371/journal.pbio.3001775 (PMC9470001; doi:10.1371/journal.pbio.3001775)
Supplement: S10 Data — (CSV) [file pbio.3001775.s024.csv]

species	variable	category	Kendall.tau	p.value	co_factor
Arabidopsis	omega	long	1	0.00483224086889614	Length
Arabidopsis	omega	short	1	0.00483224086889614	Length
Arabidopsis	omega[na]	long	0.866666666666667	0.0145950349193167	Length
Arabidopsis	omega[na]	short	0.866666666666667	0.0145950349193167	Length
Arabidopsis	omega[a]	long	-0.2	0.57302511935539	Length
Arabidopsis	omega[a]	short	0.6	0.090873939986249	Length
Drosophila	omega	long	0.866666666666667	0.0145950349193167	Length
Drosophila	omega	short	0.733333333333333	0.0387775043923066	Length
Drosophila	omega[na]	long	0.6	0.090873939986249	Length
Drosophila	omega[na]	short	0.866666666666667	0.0145950349193167	Length
Drosophila	omega[a]	long	0.866666666666667	0.0145950349193167	Length
Drosophila	omega[a]	short	0.466666666666667	0.188486038067375	Length
