# Supplementary material for: Strong evidence for the adaptive walk model of gene evolution in Drosophila and Arabidopsis
Source: PLoS Biol. 2022 Sep 13;20(9):e3001775. doi: 10.1371/journal.pbio.3001775 (PMC9470001; doi:10.1371/journal.pbio.3001775)
Supplement: S27 Data — (CSV) [file pbio.3001775.s041.csv]

GeneID	Clade	mean.DGrantham	species
CG10000	1	0.316042202040816	Drosophila
CG10001	4	0	Drosophila
CG10005	7	0.029679975	Drosophila
CG10009	2	0.0143204407407407	Drosophila
CG10013	11	0.431635579464286	Drosophila
CG10014	10	0.1388931195	Drosophila
CG10018	1	0.65872629275	Drosophila
CG10021	1	0.008163925	Drosophila
CG10023	1	0.0124636759615385	Drosophila
CG10026	2	0.279481056	Drosophila
CG10031	1	0.169147569444444	Drosophila
CG10034	4	0.129191457894737	Drosophila
CG10035	10	0.123962317592593	Drosophila
CG10037	4	0	Drosophila
CG10038	2	0.0696242456521739	Drosophila
CG10042	2	0.314069553246753	Drosophila
CG10045	1	0.269552966666667	Drosophila
CG10047	1	0	Drosophila
CG10050	1	0.079987659375	Drosophila
CG10051	1	0.116678788333333	Drosophila
CG10053	2	0.391257867307692	Drosophila
CG10055	2	0.306648159756098	Drosophila
CG10059	2	0.508690897826087	Drosophila
CG10060	1	0	Drosophila
CG10061	2	0.2154617375	Drosophila
CG10062	1	0.065658969	Drosophila
CG10063	11	0.431349738888889	Drosophila
CG10064	1	0.00469683958333333	Drosophila
CG10067	1	0	Drosophila
CG10068	2	0.0958415404761905	Drosophila
CG10069	1	0.0178348589285714	Drosophila
CG1007	5	0	Drosophila
CG10071	2	0	Drosophila
CG10073	1	0.283801491826923	Drosophila
CG10075	1	0.3022122625	Drosophila
CG10077	1	0.11403895125	Drosophila
CG10078	1	0.00794929298245614	Drosophila
CG10079	1	0.187628988235294	Drosophila
CG10080	2	0.1047742005	Drosophila
CG10083	2	0.0517221095238095	Drosophila
CG10084	2	0.213194045723684	Drosophila
CG10086	2	0.0672659	Drosophila
CG10089	1	0.176616277	Drosophila
CG10093	1	0.388992204761905	Drosophila
CG10098	1	0.152250381481481	Drosophila
CG10103	2	0.0796553975	Drosophila
CG10104	1	0.196099174242424	Drosophila
CG10105	3	0.668555923214286	Drosophila
CG10106	4	0.484627825	Drosophila
CG10108	11	0.138063255	Drosophila
CG10110	2	0.0535965558080808	Drosophila
CG10112	9	0.11498114047619	Drosophila
CG10121	4	0.136076220714286	Drosophila
CG10122	1	0.191411547669492	Drosophila
CG10123	1	0.124194227083333	Drosophila
CG10124	2	0.0297424538461538	Drosophila
CG10125	4	0.272314001923077	Drosophila
CG10128	1	0.655183141666667	Drosophila
CG10129	1	0.267082200791855	Drosophila
CG10130	2	0	Drosophila
CG10131	1	0.139588190322581	Drosophila
CG10132	1	0.124617886486486	Drosophila
CG10134	8	0.0615094544117647	Drosophila
CG10137	2	0.11264195	Drosophila
CG10139	4	0.108844530434783	Drosophila
CG10140	4	0.53943819	Drosophila
CG10142	1	0.0921550055555555	Drosophila
CG10143	1	0.282453189189189	Drosophila
CG10144	2	0.135956810215054	Drosophila
CG10145	1	0.126959619047619	Drosophila
CG10146	10	0	Drosophila
CG10147	1	0.133704321428571	Drosophila
CG10149	1	0.2015439175	Drosophila
CG10151	4	0.2020393625	Drosophila
CG10152	8	0	Drosophila
CG10157	2	0.235300180769231	Drosophila
CG10158	4	0.513432909523809	Drosophila
CG10159	11	0.025969978125	Drosophila
CG10160	1	0.143294845833333	Drosophila
CG10161	2	0.0112302608108108	Drosophila
CG10163	1	0.173382309722222	Drosophila
CG10166	1	0.00744222173913044	Drosophila
CG1017	2	0	Drosophila
CG10173	2	0.00259291428571429	Drosophila
CG10174	1	0.429268871153846	Drosophila
CG10175	1	0.12229864	Drosophila
CG10177	1	0.746005492307692	Drosophila
CG10181	1	0.0214613014285714	Drosophila
CG10182	1	0.257819479435484	Drosophila
CG10184	1	0.353727184615385	Drosophila
CG10188	2	0.0414389626373626	Drosophila
CG10189	2	0.174892289	Drosophila
CG10191	1	0.202439365	Drosophila
CG10203	1	0	Drosophila
CG10205	11	1.02366693571429	Drosophila
CG10209	10	0.00453148620689655	Drosophila
CG10210	1	0.156584863736264	Drosophila
CG10214	1	0.8124527375	Drosophila
CG10215	1	0	Drosophila
CG10219	3	0	Drosophila
CG10221	1	0.314115339351852	Drosophila
CG10222	1	0.0910368716666667	Drosophila
CG10226	1	0.023818081875	Drosophila
CG10229	1	0.103650583125	Drosophila
CG10230	2	0.03710031875	Drosophila
CG10232	1	0.702469038181818	Drosophila
CG10234	1	0.103002227272727	Drosophila
CG10236	1	0.0590599753968254	Drosophila
CG10237	2	0.625546154545454	Drosophila
CG10238	1	0.25595155625	Drosophila
CG10241	1	0.247840188571429	Drosophila
CG10242	1	0.131223509433962	Drosophila
CG10246	1	0.0456841416666667	Drosophila
CG10248	1	0.0923539907894737	Drosophila
CG10250	6	0.445254059615385	Drosophila
CG10252	2	0	Drosophila
CG10253	1	0.14677837	Drosophila
CG10255	1	0.0839288985294118	Drosophila
CG10257	3	0.096662975	Drosophila
CG10262	1	0.0828539785714285	Drosophila
CG10264	4	0.748342876666667	Drosophila
CG10265	11	0.802981194607843	Drosophila
CG10267	1	0.15406333125	Drosophila
CG10268	2	0.0692807565217391	Drosophila
CG10270	1	0.149546569047619	Drosophila
CG10278	2	0.384156067123288	Drosophila
CG10280	1	0.376359093181818	Drosophila
CG10281	2	0	Drosophila
CG10283	6	0.446156433333333	Drosophila
CG10286	2	0.0812335794642857	Drosophila
CG10289	2	0.282733825757576	Drosophila
CG10296	4	0.0527615115853659	Drosophila
CG10297	4	0.002488375	Drosophila
CG10298	1	0.179456818181818	Drosophila
CG10300	4	0.0356697178571428	Drosophila
CG10306	2	0.0726980722222222	Drosophila
CG10307	1	0.2168633575	Drosophila
CG10308	2	0.447886283	Drosophila
CG1031	1	0.1485301535	Drosophila
CG10315	1	0.513956097222222	Drosophila
CG10318	2	0	Drosophila
CG10321	1	0.174895626229508	Drosophila
CG10324	2	0.489343065454545	Drosophila
CG10325	2	0	Drosophila
CG10326	6	0.1097202675	Drosophila
CG10327	1	0.0964113413461538	Drosophila
CG10328	1	0.613957116935484	Drosophila
CG10333	1	0.112068410714286	Drosophila
CG10334	6	0.085434895	Drosophila
CG10335	1	0	Drosophila
CG10336	2	1.14917336666667	Drosophila
CG10337	11	0.101800066666667	Drosophila
CG10338	2	0.00308697763157895	Drosophila
CG10339	1	0.017966999	Drosophila
CG10343	2	0.08310393	Drosophila
CG10344	2	0.13508656875	Drosophila
CG10345	2	0.135592696428571	Drosophila
CG10347	4	0.815507593103448	Drosophila
CG10348	1	0.113550383333333	Drosophila
CG10354	2	0.0706872162790698	Drosophila
CG10359	2	0.2414716203125	Drosophila
CG10360	2	0.472876777459016	Drosophila
CG10361	1	0.0623423348484849	Drosophila
CG10362	3	0.0677420462765957	Drosophila
CG10363	1	0.239856568487395	Drosophila
CG10364	11	0.241319823170732	Drosophila
CG10365	1	0.0693956366666666	Drosophila
CG10366	1	0.258160144886364	Drosophila
CG10369	1	0.007353111875	Drosophila
CG10370	1	0	Drosophila
CG10371	1	0	Drosophila
CG10372	2	0.0853322794871795	Drosophila
CG10373	2	0.563896296875	Drosophila
CG10374	3	0.191049615909091	Drosophila
CG10375	1	0.0351501727272727	Drosophila
CG10376	1	0.179750375	Drosophila
CG10377	1	0.0384872147058824	Drosophila
CG10379	2	0.115048013577586	Drosophila
CG10382	1	0.0755899620689655	Drosophila
CG10383	1	0.0816697840163934	Drosophila
CG10384	2	0.0619000083333333	Drosophila
CG10385	6	0.601385324557522	Drosophila
CG10390	2	0.772968941743119	Drosophila
CG10393	4	0.041551965	Drosophila
CG10396	3	0.502522736111111	Drosophila
CG10399	1	0.120072482352941	Drosophila
CG10406	2	0.045839	Drosophila
CG10407	4	0.22028878125	Drosophila
CG10413	1	0.00182858474576271	Drosophila
CG10414	1	0.429633725961538	Drosophila
CG10415	2	0.1326235	Drosophila
CG10417	1	0.436387356696429	Drosophila
CG10418	2	0	Drosophila
CG10419	3	0.0804354403846153	Drosophila
CG10423	1	0	Drosophila
CG10424	1	0.1775506	Drosophila
CG10425	1	0.0511611095238095	Drosophila
CG10426	2	0.130061999193548	Drosophila
CG10428	1	0.00701198214285714	Drosophila
CG10433	10	0.08310393	Drosophila
CG10435	4	0.4724679065	Drosophila
CG10440	2	0	Drosophila
CG10445	1	0.468265070731707	Drosophila
CG10446	4	0.21603705	Drosophila
CG10447	2	0	Drosophila
CG10459	1	0.573926201744186	Drosophila
CG1046	2	0	Drosophila
CG10460	2	0	Drosophila
CG10462	1	0.641844653571429	Drosophila
CG10465	2	0.0090752	Drosophila
CG10470	2	0	Drosophila
CG10472	1	0.4013811675	Drosophila
CG10475	1	0.11063064375	Drosophila
CG10476	10	0.33077625	Drosophila
CG10478	2	0.760858061619718	Drosophila
CG10479	6	0.0576251821428571	Drosophila
CG10480	1	0.124361537962963	Drosophila
CG10483	2	0.00141992857142857	Drosophila
CG10488	3	0.0221023431034483	Drosophila
CG1049	1	0	Drosophila
CG10491	4	0.1038799125	Drosophila
CG10496	10	0.56170659673913	Drosophila
CG10498	1	0.417605633333333	Drosophila
CG10501	1	0.0286489839285714	Drosophila
CG10504	1	0.0192436073529412	Drosophila
CG10508	8	0.352595485204082	Drosophila
CG10510	6	0.20899122027027	Drosophila
CG10512	1	0.782180475	Drosophila
CG10513	1	0.200595340555556	Drosophila
CG10514	1	0.0537237439393939	Drosophila
CG10516	1	0.11218956	Drosophila
CG10521	3	0.14231925	Drosophila
CG10522	1	0.116547442647059	Drosophila
CG10523	1	0.0304413	Drosophila
CG10527	1	0.2322148675	Drosophila
CG10528	3	0.301422708823529	Drosophila
CG10534	4	0.573728023076923	Drosophila
CG10535	2	0.342218616260163	Drosophila
CG10537	1	0	Drosophila
CG10540	2	0	Drosophila
CG10545	1	0	Drosophila
CG10546	2	0.1620277875	Drosophila
CG10553	6	0.177940080813953	Drosophila
CG10555	2	0.114454983888889	Drosophila
CG10561	1	0.376113678645833	Drosophila
CG10562	1	0.141983779347826	Drosophila
CG10563	2	0.0450912125	Drosophila
CG10564	1	0.101933246031746	Drosophila
CG10565	1	0.171985443085106	Drosophila
CG10566	4	0.209306495833333	Drosophila
CG1057	2	0	Drosophila
CG10571	1	0.373130652777778	Drosophila
CG10572	1	0	Drosophila
CG10575	1	0.136220672222222	Drosophila
CG10576	1	0.0568941434782609	Drosophila
CG10580	2	0	Drosophila
CG10583	2	0.201604134482759	Drosophila
CG10585	1	0.0363490361111111	Drosophila
CG10586	1	0.712591270652174	Drosophila
CG10587	1	0.290285848076923	Drosophila
CG10588	1	0.140592749831081	Drosophila
CG10592	1	0.0678014467741936	Drosophila
CG10593	1	0.203468626595745	Drosophila
CG10594	1	0.225221397916667	Drosophila
CG10600	3	0.399999643318965	Drosophila
CG10604	1	0.0868262533333333	Drosophila
CG10610	3	0.01826764	Drosophila
CG10612	10	0.286265627586207	Drosophila
CG10616	6	0.391253254545455	Drosophila
CG10619	2	0	Drosophila
CG10620	2	0.0175750863636364	Drosophila
CG10621	1	0.1012912	Drosophila
CG10622	1	0	Drosophila
CG10623	1	0.154673863793103	Drosophila
CG10624	7	0	Drosophila
CG10626	3	0.0473198427083333	Drosophila
CG10627	1	0.201236802222222	Drosophila
CG10628	1	0.0415819556451613	Drosophila
CG10630	5	0.991172511206897	Drosophila
CG10635	2	0.0891501916666667	Drosophila
CG10638	1	0.167827844117647	Drosophila
CG10639	1	0.05498815	Drosophila
CG1064	2	0	Drosophila
CG10640	2	0	Drosophila
CG10641	1	0	Drosophila
CG10642	2	0.0269043230769231	Drosophila
CG10645	2	0.071055632	Drosophila
CG10646	1	0	Drosophila
CG10648	2	0	Drosophila
CG1065	1	0	Drosophila
CG10650	11	0.628892796666667	Drosophila
CG10653	2	0	Drosophila
CG10654	1	0.349988938636364	Drosophila
CG10657	2	0.01064853125	Drosophila
CG10664	3	0.394775859090909	Drosophila
CG10669	1	0.201496439144737	Drosophila
CG10672	1	0.189681840384615	Drosophila
CG10673	1	0.07860684	Drosophila
CG10674	2	0	Drosophila
CG10679	1	0	Drosophila
CG10680	12	0.71369419875	Drosophila
CG10681	2	0.082465915	Drosophila
CG10685	1	0	Drosophila
CG10687	1	0.114173832638889	Drosophila
CG10688	1	0	Drosophila
CG10689	1	0.0317836737288136	Drosophila
CG10691	1	0	Drosophila
CG10693	1	0	Drosophila
CG10695	1	0.4355785390625	Drosophila
CG10697	1	0	Drosophila
CG10698	5	0.0672585620689655	Drosophila
CG10699	2	0	Drosophila
CG10701	2	0	Drosophila
CG10702	4	0.220359922894737	Drosophila
CG10703	2	0.110082353409091	Drosophila
CG10704	2	0.3268085890625	Drosophila
CG1071	2	0	Drosophila
CG10713	10	0	Drosophila
CG10718	2	0.187307111267606	Drosophila
CG10719	1	0.0276179928571428	Drosophila
CG1072	2	0	Drosophila
CG10721	1	0.219312578571429	Drosophila
CG10722	5	0.115747857954545	Drosophila
CG10723	1	0.458345175	Drosophila
CG10728	1	0.0707751625	Drosophila
CG10731	1	0	Drosophila
CG10732	9	0.202665385	Drosophila
CG10733	2	0	Drosophila
CG10734	12	0.843472324074074	Drosophila
CG10738	1	0.0898604293333333	Drosophila
CG10739	4	0.133429726470588	Drosophila
CG10742	3	0.208306015	Drosophila
CG10743	2	0.15057362051282	Drosophila
CG10748	1	0.107023397368421	Drosophila
CG10749	1	0.270930289285714	Drosophila
CG10750	3	0.294660582692308	Drosophila
CG10751	1	0	Drosophila
CG10752	4	1.07883104930556	Drosophila
CG10754	2	0.0807645375	Drosophila
CG10755	1	0.270508227830189	Drosophila
CG10756	2	0	Drosophila
CG10757	1	0.33463254	Drosophila
CG10759	10	0.38233305	Drosophila
CG1076	2	0.462079171052632	Drosophila
CG10763	1	0	Drosophila
CG10776	1	0.100293076190476	Drosophila
CG10777	1	0.160847201282051	Drosophila
CG10778	1	0.0963870428571428	Drosophila
CG1078	2	0.057709625	Drosophila
CG10800	12	0.156383614285714	Drosophila
CG10801	4	0.753272136024845	Drosophila
CG10803	1	0.600641364634146	Drosophila
CG10805	2	0.2124620418	Drosophila
CG10806	1	0.039490688372093	Drosophila
CG10808	3	0	Drosophila
CG10809	1	0.0381241852941176	Drosophila
CG1081	1	0	Drosophila
CG10812	7	0	Drosophila
CG1082	1	0.134542826162791	Drosophila
CG10822	2	0.096662975	Drosophila
CG10833	1	0.0688109416666667	Drosophila
CG10834	1	0.0940693681818182	Drosophila
CG10838	1	0.106602475	Drosophila
CG10839	1	0.162899352083333	Drosophila
CG10841	2	0.00727067142857143	Drosophila
CG10849	1	0.25708078125	Drosophila
CG10850	2	0.293036200641026	Drosophila
CG10851	1	0	Drosophila
CG10853	11	0.1748781	Drosophila
CG10855	10	0.459486488095238	Drosophila
CG10859	2	0.181862568115942	Drosophila
CG10861	2	0.271362828571429	Drosophila
CG10862	1	0.892439142905405	Drosophila
CG10863	1	0.039280353125	Drosophila
CG10864	1	0.00684004527027027	Drosophila
CG10866	2	0	Drosophila
CG10868	2	0.137760341071429	Drosophila
CG10874	4	0.542343255882353	Drosophila
CG10880	11	0.492845945833333	Drosophila
CG10887	2	1.16064297146018	Drosophila
CG10889	2	0.0976877525	Drosophila
CG10895	1	0.0824141057692308	Drosophila
CG10898	1	0	Drosophila
CG10899	1	0.106886164285714	Drosophila
CG10901	10	0.0908604804347826	Drosophila
CG10903	1	0	Drosophila
CG10907	1	0	Drosophila
CG10909	1	0.0914945666666667	Drosophila
CG10910	1	0.187605260714286	Drosophila
CG10911	11	0.299804592647059	Drosophila
CG10912	11	0.516571715104167	Drosophila
CG10913	1	0.1600581875	Drosophila
CG10914	1	0.30675539	Drosophila
CG10915	5	0.131051752777778	Drosophila
CG10916	1	0.05189328	Drosophila
CG10917	1	0.157512904166667	Drosophila
CG10919	11	0.0524226654761905	Drosophila
CG10920	2	0.621137974193548	Drosophila
CG10922	2	0.103455063235294	Drosophila
CG10923	2	0.152871029605263	Drosophila
CG10927	1	0.6832393325	Drosophila
CG10930	1	0.252305262244898	Drosophila
CG10931	1	0.679865426595745	Drosophila
CG10932	1	0	Drosophila
CG10936	8	0	Drosophila
CG10938	1	0.112437623148148	Drosophila
CG10939	1	0	Drosophila
CG10946	4	0.0146933214285714	Drosophila
CG10947	1	0.612727976388889	Drosophila
CG10948	2	0.158961789285714	Drosophila
CG10949	4	0.226475161428571	Drosophila
CG10950	2	0.8087916395	Drosophila
CG10954	2	0	Drosophila
CG10955	2	0.0194046087209302	Drosophila
CG10958	2	0.146906886458333	Drosophila
CG10959	1	0.5950895	Drosophila
CG10960	1	0.162321334285714	Drosophila
CG10969	12	0.437680549576271	Drosophila
CG10970	2	0.32232104375	Drosophila
CG10972	4	0.0670089634615385	Drosophila
CG10973	2	0.278584261538461	Drosophila
CG1098	1	0	Drosophila
CG10981	2	0.269644991666667	Drosophila
CG10988	2	0.548786079449152	Drosophila
CG1099	2	0	Drosophila
CG10992	1	0.225982902173913	Drosophila
CG10996	1	0.095159	Drosophila
CG10997	2	0	Drosophila
CG1100	1	0.00425325833333333	Drosophila
CG11001	1	0	Drosophila
CG11007	1	0	Drosophila
CG1101	1	0.0620578076923077	Drosophila
CG11010	2	0	Drosophila
CG11015	2	0	Drosophila
CG11018	12	0.196872975	Drosophila
CG1102	1	0.44584485	Drosophila
CG11024	2	0.337286807142857	Drosophila
CG11025	2	0.1613503	Drosophila
CG11030	2	0.000765653846153846	Drosophila
CG11035	1	0.0966602439393939	Drosophila
CG11037	1	0.0935061092592593	Drosophila
CG11041	1	0.695828786111111	Drosophila
CG11048	2	0.0267081729166667	Drosophila
CG1105	2	0	Drosophila
CG11050	1	0	Drosophila
CG11052	1	0.539657555	Drosophila
CG11055	1	0.0971040954545454	Drosophila
CG1106	1	0.359744435714286	Drosophila
CG11063	2	0	Drosophila
CG11066	1	0.278444849166667	Drosophila
CG11069	1	0.0263029064516129	Drosophila
CG1107	1	0.214445010714286	Drosophila
CG1108	1	0.248405195081967	Drosophila
CG11084	2	0.0781145336956522	Drosophila
CG11086	5	0.00567971428571428	Drosophila
CG11089	1	0.058049079787234	Drosophila
CG1109	1	0	Drosophila
CG11092	2	0.614459745990566	Drosophila
CG11094	4	0	Drosophila
CG11095	1	0.0925873071428571	Drosophila
CG11099	1	0	Drosophila
CG11100	4	0.307283961363636	Drosophila
CG11101	3	0.118442389320388	Drosophila
CG11103	1	0	Drosophila
CG11106	12	0.384062211764706	Drosophila
CG11107	1	0.0578203245762712	Drosophila
CG11109	1	0.330138651415094	Drosophila
CG11110	1	0.0589191954545455	Drosophila
CG11111	1	0.0290138575	Drosophila
CG11115	2	0.195074118367347	Drosophila
CG1112	1	0.173602603181818	Drosophila
CG11120	9	0.580358417105263	Drosophila
CG11121	2	0.17308036	Drosophila
CG11122	10	0.118590386392405	Drosophila
CG11123	2	0.0958967263157895	Drosophila
CG11124	5	0.142741375	Drosophila
CG11128	1	0.0434959035714286	Drosophila
CG11129	1	0.367229363157895	Drosophila
CG11130	1	0.0614095361111111	Drosophila
CG11131	11	0.230750295833333	Drosophila
CG11132	2	0.120767805172414	Drosophila
CG11133	1	0.735864479041916	Drosophila
CG11136	1	0.0209074384615385	Drosophila
CG11137	2	0.0202259230769231	Drosophila
CG11138	4	0	Drosophila
CG11139	2	0.0848763	Drosophila
CG11140	1	0.439491707142857	Drosophila
CG11141	2	0.138867792	Drosophila
CG11142	3	0.0934703476190476	Drosophila
CG11143	1	0.138370019512195	Drosophila
CG11156	2	0.214235271428571	Drosophila
CG11158	1	0.104937315151515	Drosophila
CG11159	6	0	Drosophila
CG11160	2	0.0832293416666666	Drosophila
CG11163	1	0.455676369444444	Drosophila
CG11164	2	0.0991486642857143	Drosophila
CG11166	2	0.40337575	Drosophila
CG11168	1	0.0913631409090909	Drosophila
CG11170	6	0.43069675	Drosophila
CG11173	2	0.163803043333333	Drosophila
CG11175	8	0.000904863636363636	Drosophila
CG11178	2	0.168845194642857	Drosophila
CG11182	2	0.05935995	Drosophila
CG11183	2	0.0676150480769231	Drosophila
CG11184	2	0.479828533152174	Drosophila
CG11188	2	0.235122113636364	Drosophila
CG1119	1	0.0259782573170732	Drosophila
CG11192	1	0.509016580555556	Drosophila
CG11194	2	0	Drosophila
CG11196	1	0.191311874193548	Drosophila
CG11199	2	0	Drosophila
CG11200	1	0.260500673333333	Drosophila
CG11201	1	0.172097782	Drosophila
CG11202	2	0.0635864102941176	Drosophila
CG11207	2	0.245691502941176	Drosophila
CG11208	1	0	Drosophila
CG1121	1	0.0921141517543859	Drosophila
CG11210	2	0.299622532	Drosophila
CG11217	1	0	Drosophila
CG11218	10	0.06962855	Drosophila
CG11221	1	0	Drosophila
CG11226	12	0.895141991071428	Drosophila
CG11227	11	0.850344209545455	Drosophila
CG11237	1	0.0732584388157895	Drosophila
CG11242	2	0	Drosophila
CG11246	2	0	Drosophila
CG11248	3	0.394222608823529	Drosophila
CG11249	1	0.274190943125	Drosophila
CG11251	1	0.092908891	Drosophila
CG11255	1	0.00773018235294118	Drosophila
CG11257	1	0.181686135483871	Drosophila
CG11258	1	0	Drosophila
CG11259	2	0.389767681060606	Drosophila
CG11262	1	0.416866611111111	Drosophila
CG11266	1	0.0526969352941176	Drosophila
CG11267	1	0.38196382	Drosophila
CG11274	2	0.14028455625	Drosophila
CG11275	2	0.293761602419355	Drosophila
CG11276	1	0	Drosophila
CG11278	2	0.3502706375	Drosophila
CG11279	11	0	Drosophila
CG11280	1	0.00411413	Drosophila
CG11284	1	0	Drosophila
CG11286	11	0.610507502380952	Drosophila
CG1129	1	0.141812072222222	Drosophila
CG11290	2	0.12868121	Drosophila
CG11291	1	0.501346406730769	Drosophila
CG11295	1	0.0382086947674418	Drosophila
CG1130	1	0	Drosophila
CG11301	1	0	Drosophila
CG11305	1	0.14300727826087	Drosophila
CG11308	4	0.373179191666667	Drosophila
CG1131	1	0.174391708333333	Drosophila
CG11312	8	0.0500970824074074	Drosophila
CG11318	2	0.49022231375	Drosophila
CG11319	1	0	Drosophila
CG1132	2	0	Drosophila
CG11322	2	0.298934075	Drosophila
CG11325	4	0.136073814285714	Drosophila
CG11329	2	0.476811152380952	Drosophila
CG1133	1	0	Drosophila
CG11333	1	0.404839190909091	Drosophila
CG11334	1	0.176614992307692	Drosophila
CG11348	1	0.0109974375	Drosophila
CG11349	12	0.3932147828125	Drosophila
CG11352	1	0.164382940517241	Drosophila
CG11353	1	0.246511563461538	Drosophila
CG11370	11	0.4031487	Drosophila
CG11371	10	0.811156089166667	Drosophila
CG11372	1	0.411903114285714	Drosophila
CG11373	12	0.1819814	Drosophila
CG11375	2	0.0739883920103093	Drosophila
CG11376	2	0.118184994495413	Drosophila
CG11377	2	0.1422105078125	Drosophila
CG11378	8	0.054098527	Drosophila
CG11379	12	0.186471016666667	Drosophila
CG11380	10	0.458111360416667	Drosophila
CG11382	11	0.275770578571429	Drosophila
CG11388	3	0.175925251041667	Drosophila
CG11390	1	0.0342844166666667	Drosophila
CG11397	1	0.195470403308824	Drosophila
CG11399	2	0.245023479375	Drosophila
CG1140	1	0.127710388709677	Drosophila
CG11401	1	0.149272597222222	Drosophila
CG11403	1	0.340903599074074	Drosophila
CG11406	1	0.6918081125	Drosophila
CG11407	1	0.0489697205128205	Drosophila
CG11409	10	0.0712920221153846	Drosophila
CG11411	9	0.353478491714286	Drosophila
CG11412	1	0.563249861029412	Drosophila
CG11413	12	1.10537512727273	Drosophila
CG11416	2	0.775936075724638	Drosophila
CG11417	2	0.178686867672414	Drosophila
CG11418	2	0.370580593367347	Drosophila
CG11419	2	0	Drosophila
CG11420	1	0.159069588461538	Drosophila
CG11421	10	0.108018525	Drosophila
CG11422	10	0.0811466357142857	Drosophila
CG11425	1	0.368916041666667	Drosophila
CG11426	2	0.4081389	Drosophila
CG11427	2	0.0709368168421053	Drosophila
CG11430	3	0.0950600659090909	Drosophila
CG11436	3	0.395045768181818	Drosophila
CG11438	2	0	Drosophila
CG11440	2	0.340152822321429	Drosophila
CG11444	2	0.252149596	Drosophila
CG11447	1	0.081939595	Drosophila
CG11448	4	0.02698205	Drosophila
CG11449	2	0.134153129464286	Drosophila
CG11450	4	0.357479508333333	Drosophila
CG11451	11	0.571053927449324	Drosophila
CG11454	1	0.377129614655172	Drosophila
CG11455	6	0	Drosophila
CG11456	1	0.403919553846154	Drosophila
CG11459	1	0.389493644230769	Drosophila
CG1147	4	0	Drosophila
CG11471	1	0.0604255826754386	Drosophila
CG11475	1	0.14210296625	Drosophila
CG11482	1	0.298125181632653	Drosophila
CG11488	1	0.107070018421053	Drosophila
CG11490	2	0.103528552314815	Drosophila
CG11495	1	0.483581929255319	Drosophila
CG11498	5	0.0788118228571429	Drosophila
CG11501	10	0.179782731818182	Drosophila
CG11504	4	0	Drosophila
CG11518	3	0.181977658333333	Drosophila
CG11522	2	0.14987293	Drosophila
CG11525	2	0.537158089285714	Drosophila
CG11526	2	0.161177660344828	Drosophila
CG11529	1	0.221262106944444	Drosophila
CG11534	2	0	Drosophila
CG11546	3	0	Drosophila
CG11550	4	0.0213308190476191	Drosophila
CG11552	2	1.25356003888889	Drosophila
CG11556	2	0.346494978571429	Drosophila
CG11560	7	0.53392046171875	Drosophila
CG11562	3	0.069253275	Drosophila
CG11563	4	0	Drosophila
CG11567	1	0.0496778147058823	Drosophila
CG11575	7	0.536847447282609	Drosophila
CG11576	2	0.507963892307692	Drosophila
CG11577	3	1.045660725	Drosophila
CG11579	2	0	Drosophila
CG11581	12	0.0942989693181818	Drosophila
CG11584	2	0.357254828125	Drosophila
CG11585	12	0.38495413	Drosophila
CG11586	2	0.06855436875	Drosophila
CG11588	3	0.457437778191489	Drosophila
CG11590	1	0.329681359615385	Drosophila
CG11596	1	0.26249415703125	Drosophila
CG11601	2	0.0658806346153846	Drosophila
CG11607	1	0.242401208333333	Drosophila
CG11608	1	0.415141155882353	Drosophila
CG11611	2	0.19332595	Drosophila
CG11617	2	0.20945905	Drosophila
CG11621	2	0.0681423452777778	Drosophila
CG11622	2	0.025210984375	Drosophila
CG11629	12	0.352298471875	Drosophila
CG1163	1	0	Drosophila
CG11630	2	0.12264531372549	Drosophila
CG11634	11	0.327211418055555	Drosophila
CG11635	11	0.267137055882353	Drosophila
CG11637	6	0.810630575	Drosophila
CG11638	1	1.035296848	Drosophila
CG11639	2	1.18251184333333	Drosophila
CG11642	2	0	Drosophila
CG11648	2	0	Drosophila
CG1165	1	0	Drosophila
CG11652	1	0.209724006862745	Drosophila
CG11654	1	0.0392007	Drosophila
CG11655	1	0.0249756318181818	Drosophila
CG11658	5	0	Drosophila
CG11663	12	0.1391374140625	Drosophila
CG11664	1	0	Drosophila
CG1167	1	0	Drosophila
CG11672	11	0.1906078375	Drosophila
CG11674	7	0.878608338235294	Drosophila
CG11679	1	0.0875554788461538	Drosophila
CG11680	1	0.255561106756757	Drosophila
CG11695	1	0.547186882638889	Drosophila
CG11696	1	0.0335032242647059	Drosophila
CG11703	4	0.413261643589744	Drosophila
CG11709	1	0.03437653125	Drosophila
CG11714	2	0.535231047826087	Drosophila
CG11715	1	0.00593197012195122	Drosophila
CG11719	11	0	Drosophila
CG11720	12	1.55247686666667	Drosophila
CG11723	7	0.03330777	Drosophila
CG11737	2	0.264599571052632	Drosophila
CG11738	1	0.286403116666667	Drosophila
CG11739	2	0.03227006	Drosophila
CG11742	10	0.209455495408163	Drosophila
CG11750	10	0	Drosophila
CG11752	10	0.444571172222222	Drosophila
CG11753	2	0	Drosophila
CG11755	2	0.036616397368421	Drosophila
CG11756	12	0.951442785344828	Drosophila
CG11760	5	0	Drosophila
CG11761	2	0.096822603125	Drosophila
CG11762	1	0.46406465078125	Drosophila
CG11765	1	0	Drosophila
CG11767	10	0.248852138235294	Drosophila
CG11768	10	0.195294930434783	Drosophila
CG11770	2	0.102373899285714	Drosophila
CG11771	1	0.0919763653061224	Drosophila
CG11777	1	0	Drosophila
CG11778	1	0.292976116346154	Drosophila
CG11779	1	0.305445188043478	Drosophila
CG11780	1	0.337618133823529	Drosophila
CG11781	2	0.45998878	Drosophila
CG11783	4	0.127928183125	Drosophila
CG11785	2	0.09548078	Drosophila
CG11788	2	0.0487161071428572	Drosophila
CG1179	1	0	Drosophila
CG11790	2	0.305934433333333	Drosophila
CG11796	1	0	Drosophila
CG11797	10	0.5708903	Drosophila
CG1180	1	0	Drosophila
CG11802	4	0.0918509444444444	Drosophila
CG11804	3	0.0284470717391304	Drosophila
CG11807	2	0.153693673529412	Drosophila
CG11808	10	0.505017183333333	Drosophila
CG11811	1	0.0873821916666667	Drosophila
CG11816	11	0.257440885	Drosophila
CG11820	5	0.2979329125	Drosophila
CG11821	1	0.194157241818182	Drosophila
CG11822	1	0.281075626086957	Drosophila
CG11833	1	0.297737891145833	Drosophila
CG11835	1	0.410204921268657	Drosophila
CG11837	1	0	Drosophila
CG11840	2	0.0298796851851852	Drosophila
CG11841	1	0.336187591666667	Drosophila
CG11848	2	0.0590598229166667	Drosophila
CG11851	2	0.0153224920454545	Drosophila
CG11852	4	0.01314131	Drosophila
CG11853	8	0.0193822681818182	Drosophila
CG11857	2	0.0384872147058824	Drosophila
CG11858	1	0.0754043846153846	Drosophila
CG11859	1	0.186155034848485	Drosophila
CG11864	1	0.504957606034483	Drosophila
CG11866	6	0.24410641875	Drosophila
CG11874	1	0.0729624484693878	Drosophila
CG11876	1	0	Drosophila
CG11877	3	0.128795662068966	Drosophila
CG11880	2	0.132120262037037	Drosophila
CG11881	4	0.135380933088235	Drosophila
CG11882	11	0.1706480875	Drosophila
CG11885	11	0.105580342857143	Drosophila
CG11886	2	0.437928194	Drosophila
CG11887	1	0.218210935185185	Drosophila
CG11892	1	0.229275178333333	Drosophila
CG11893	6	0.217204345744681	Drosophila
CG11896	1	0.322016218965517	Drosophila
CG11897	1	0.124237444354839	Drosophila
CG11898	1	0.044739044375	Drosophila
CG11899	1	0	Drosophila
CG11901	1	0.0891142727272727	Drosophila
CG11902	1	0.335714575980392	Drosophila
CG11906	6	0.125400794607843	Drosophila
CG11907	2	0.281458401428571	Drosophila
CG11919	1	0.174133891666667	Drosophila
CG11920	1	0.0589191954545455	Drosophila
CG11921	2	0	Drosophila
CG11922	2	0	Drosophila
CG11926	2	0.00587505172413793	Drosophila
CG11927	11	0.356972809090909	Drosophila
CG11929	11	0.816285401666667	Drosophila
CG1193	1	0.054442887962963	Drosophila
CG11941	1	0.543566866666667	Drosophila
CG11949	1	0.0231468267857143	Drosophila
CG11961	1	0.0442441319148936	Drosophila
CG11967	1	0	Drosophila
CG11968	1	0.0166458683333333	Drosophila
CG11970	2	0.231381561296296	Drosophila
CG11979	1	0	Drosophila
CG11981	1	0	Drosophila
CG11982	2	0.120797440151515	Drosophila
CG11983	10	0.393260400675676	Drosophila
CG11984	2	0.300377688793103	Drosophila
CG11985	2	0	Drosophila
CG11986	1	0.4503207046875	Drosophila
CG11988	2	0.0160521345238095	Drosophila
CG11990	2	0.0467781261904762	Drosophila
CG11993	11	0.219721988970588	Drosophila
CG11994	1	0.247323422619048	Drosophila
CG1200	2	0	Drosophila
CG12001	2	0.746506927777778	Drosophila
CG12002	1	0.0294521487341772	Drosophila
CG12005	2	0.2587654	Drosophila
CG12006	1	0.000572624999999999	Drosophila
CG12007	2	0.471551945098039	Drosophila
CG12009	4	0.09407942	Drosophila
CG12010	1	0.316049776538462	Drosophila
CG12011	12	0.394040488157895	Drosophila
CG12012	2	0	Drosophila
CG12014	1	0.0142136633333333	Drosophila
CG12015	1	0.0429613222222222	Drosophila
CG12016	1	0.266815760606061	Drosophila
CG12018	1	0.289896873529412	Drosophila
CG12019	2	0.0248756991935484	Drosophila
CG12020	1	0.0321244847826087	Drosophila
CG12021	3	0.0781276541666667	Drosophila
CG12024	4	0.111912511538462	Drosophila
CG12025	2	0	Drosophila
CG12027	4	0.3291651	Drosophila
CG12028	1	0.221114056818182	Drosophila
CG12030	1	0	Drosophila
CG12031	2	0.112230679473684	Drosophila
CG12034	1	0	Drosophila
CG12035	11	0.368202239634146	Drosophila
CG12038	4	0.0672292916666666	Drosophila
CG12042	2	0.0353697267857143	Drosophila
CG12045	4	0.0129645714285714	Drosophila
CG12047	1	0.716623188050314	Drosophila
CG12051	1	0	Drosophila
CG12056	2	0.154532123333333	Drosophila
CG12057	11	0.418672847619048	Drosophila
CG12065	1	0.1576422975	Drosophila
CG12069	1	0	Drosophila
CG12070	2	0.419695808796296	Drosophila
CG12071	1	0.0421969951923077	Drosophila
CG12073	3	0.0559562557692308	Drosophila
CG12075	7	0.0779536147727272	Drosophila
CG12076	2	0.224580677777778	Drosophila
CG12077	2	0.0214788333333333	Drosophila
CG12078	1	0.870900606	Drosophila
CG12081	1	0.0375753863636364	Drosophila
CG12082	2	0.201267973660714	Drosophila
CG12084	3	0.216419563888889	Drosophila
CG12085	1	0.0414172588235294	Drosophila
CG12086	1	0.329459488235294	Drosophila
CG12090	2	0.147587597426471	Drosophila
CG12091	2	0.0233929208333333	Drosophila
CG12096	2	0.538552673263889	Drosophila
CG12099	2	0.1178917953125	Drosophila
CG12101	1	0.150148152941176	Drosophila
CG12104	5	0.35223079375	Drosophila
CG12106	5	0.260119913157895	Drosophila
CG12107	2	0	Drosophila
CG12108	2	0.528006223529412	Drosophila
CG12111	1	0	Drosophila
CG12114	10	0.312614573913043	Drosophila
CG12115	11	0.299000970967742	Drosophila
CG12116	1	0.19824096	Drosophila
CG12117	1	0.243217067105263	Drosophila
CG12118	2	0.3219186875	Drosophila
CG12119	1	0.164894710714286	Drosophila
CG12120	1	0.141717361764706	Drosophila
CG12121	2	0.0167555294871795	Drosophila
CG12123	2	0.282575758928571	Drosophila
CG12126	12	0.600310628846154	Drosophila
CG12127	1	0.0478257642857143	Drosophila
CG12128	1	0.267614169021739	Drosophila
CG12129	2	0.820446210294118	Drosophila
CG1213	1	0.0503655138297872	Drosophila
CG12131	2	0	Drosophila
CG12132	2	0.114644151685393	Drosophila
CG12135	2	0.765490333333333	Drosophila
CG12141	1	0.13331348	Drosophila
CG12143	5	0.161743085294118	Drosophila
CG12147	1	0.4285361	Drosophila
CG12149	1	0.050191821875	Drosophila
CG12151	2	0.355762141071429	Drosophila
CG12153	1	0.230199868253968	Drosophila
CG12155	6	0.250523659042553	Drosophila
CG12156	1	0	Drosophila
CG12157	2	0.442632780434783	Drosophila
CG12159	6	0.140241003333333	Drosophila
CG12161	1	0.421179773837209	Drosophila
CG12162	1	0.100184138461538	Drosophila
CG12169	1	0.190800154807692	Drosophila
CG12170	1	0.137650935119048	Drosophila
CG12171	1	0.0890688807692308	Drosophila
CG12172	1	0.0455806371794872	Drosophila
CG12173	1	0.297581644444444	Drosophila
CG12177	1	0.1377777075	Drosophila
CG12178	1	0.181389622794118	Drosophila
CG12179	10	0.714117243814433	Drosophila
CG12182	11	0.126078334375	Drosophila
CG12186	1	0.135646646428571	Drosophila
CG12189	1	0.383175079032258	Drosophila
CG12190	4	0.1613503	Drosophila
CG12191	6	0.412161089130435	Drosophila
CG12192	2	0.61017125	Drosophila
CG12193	10	1.5260195	Drosophila
CG12201	1	0.0472280083333333	Drosophila
CG12202	1	0.0647092020408163	Drosophila
CG12203	1	0.0916762461538461	Drosophila
CG12204	11	0.389766258695652	Drosophila
CG12206	1	0.218824826415094	Drosophila
CG12209	11	0.0444000892857143	Drosophila
CG12210	2	0.115250214285714	Drosophila
CG12217	1	0.114277374074074	Drosophila
CG12218	1	0.1509324125	Drosophila
CG12219	2	0.2930207828125	Drosophila
CG12220	3	0.122674418181818	Drosophila
CG12225	1	0.19840632625	Drosophila
CG12227	1	0.4318312075	Drosophila
CG12230	2	0.0527558758064516	Drosophila
CG12232	2	0.159616746551724	Drosophila
CG12233	1	0	Drosophila
CG12234	2	0.165306483516483	Drosophila
CG12235	1	0.06983369609375	Drosophila
CG12236	4	0.172975865740741	Drosophila
CG12239	12	0.50407774673913	Drosophila
CG12241	2	0	Drosophila
CG12245	5	0.244091375961538	Drosophila
CG12252	2	0.122994429032258	Drosophila
CG12254	2	0	Drosophila
CG12256	1	0.0424606052631579	Drosophila
CG12261	3	0.0779797739130435	Drosophila
CG12262	1	0	Drosophila
CG12263	1	0.0324196766666667	Drosophila
CG12264	1	0.201687875	Drosophila
CG12267	2	0.0352858958333333	Drosophila
CG1227	1	0	Drosophila
CG12272	2	0.119248659146341	Drosophila
CG12276	1	0.0609340108108108	Drosophila
CG12279	1	0.10482751875	Drosophila
CG12287	3	0.08178533125	Drosophila
CG12290	6	0.0991824809523809	Drosophila
CG12292	2	0.111911008064516	Drosophila
CG12296	1	0.0713539285714286	Drosophila
CG12297	6	0.780938412068966	Drosophila
CG12298	2	0.014323122826087	Drosophila
CG12299	1	0.222715938372093	Drosophila
CG12301	2	0.382303902985075	Drosophila
CG12304	3	0.254311163157895	Drosophila
CG12306	1	0	Drosophila
CG12307	12	0.713138190277778	Drosophila
CG12309	1	0.138096943396226	Drosophila
CG12310	12	0.489632311538461	Drosophila
CG12311	1	0.185530832446809	Drosophila
CG12313	1	0.610401559302326	Drosophila
CG12316	10	0.439621015702479	Drosophila
CG12317	1	0.174301954651163	Drosophila
CG12320	2	0.142240883333333	Drosophila
CG12321	2	0.0624842866666667	Drosophila
CG12323	1	0.069282928125	Drosophila
CG12325	1	0.0593904899253731	Drosophila
CG12327	2	0.0935542540697674	Drosophila
CG1233	1	0.252280540340909	Drosophila
CG12334	2	0	Drosophila
CG12338	1	0.0474400382352941	Drosophila
CG1234	2	0.145563012121212	Drosophila
CG12345	1	0.00674552857142857	Drosophila
CG12346	2	0.0606448321428571	Drosophila
CG12350	1	0.143260517857143	Drosophila
CG12352	1	0.0741263727272728	Drosophila
CG12357	1	0	Drosophila
CG12358	6	0	Drosophila
CG12362	2	0.24233514765625	Drosophila
CG12363	2	0	Drosophila
CG12366	3	0	Drosophila
CG12367	1	0.476949052232143	Drosophila
CG12369	1	0	Drosophila
CG12372	2	0.318303183333333	Drosophila
CG12373	1	0.225571771052632	Drosophila
CG12375	1	0.1157951425	Drosophila
CG12379	2	0	Drosophila
CG12384	4	0	Drosophila
CG12386	1	0.713981689583333	Drosophila
CG12387	1	0.354451776923077	Drosophila
CG12388	1	0.215954163541667	Drosophila
CG12389	1	0.144244003571429	Drosophila
CG12390	1	0.336232967105263	Drosophila
CG12391	1	0.171169629166667	Drosophila
CG12393	2	0.06595995	Drosophila
CG12395	2	0.216148125	Drosophila
CG12396	2	0.347644138333333	Drosophila
CG12399	4	0	Drosophila
CG12404	2	0	Drosophila
CG12408	1	0.049460725	Drosophila
CG1241	2	0.191975629741379	Drosophila
CG12413	1	0.0850544814814815	Drosophila
CG1242	1	0.0281262027777778	Drosophila
CG12424	3	0.04320741	Drosophila
CG12428	1	0.0535849575757576	Drosophila
CG12437	1	0.275853596323529	Drosophila
CG12438	12	1.27522881428571	Drosophila
CG12439	11	1.00477468928571	Drosophila
CG1244	4	0	Drosophila
CG1245	2	0.0997775517241379	Drosophila
CG12470	11	0	Drosophila
CG12473	2	0.386610802238806	Drosophila
CG12479	2	0	Drosophila
CG12480	5	0.10763889375	Drosophila
CG12481	12	0.212183054166667	Drosophila
CG12483	12	0.842796745454545	Drosophila
CG12487	11	0.188882597222222	Drosophila
CG12493	5	0.973136576428571	Drosophila
CG12496	11	0.229336228947368	Drosophila
CG12498	2	0.136111524074074	Drosophila
CG12500	9	0.370854957142857	Drosophila
CG12511	5	0.723749125	Drosophila
CG12517	12	0	Drosophila
CG12526	10	0.393673305714286	Drosophila
CG12529	1	0.157464862295082	Drosophila
CG12530	1	0.16307802	Drosophila
CG12532	1	0.0295998590909091	Drosophila
CG12534	2	0.113416822222222	Drosophila
CG12535	11	0.0869516394736842	Drosophila
CG12540	10	0.236127561363636	Drosophila
CG12548	2	0.497116063043478	Drosophila
CG1257	1	0.13709043940678	Drosophila
CG1258	2	0.0175750863636364	Drosophila
CG12582	1	0.562412087916667	Drosophila
CG12590	12	0.762089219642857	Drosophila
CG12598	2	0.184693587142857	Drosophila
CG12602	1	0.0981445325396825	Drosophila
CG12605	1	0.0464706398148148	Drosophila
CG12607	11	0	Drosophila
CG12608	1	0.849709512686567	Drosophila
CG12609	10	0.79610185106383	Drosophila
CG12611	12	0.667227594078947	Drosophila
CG12620	12	0.445038346551724	Drosophila
CG12630	7	0.258209253947368	Drosophila
CG1264	1	0.0376606544871795	Drosophila
CG12653	1	0.0751494333333333	Drosophila
CG12663	11	0.320855428030303	Drosophila
CG12664	9	0.4942437175	Drosophila
CG12665	11	0	Drosophila
CG12679	11	0.49818749375	Drosophila
CG12681	11	0.837860871428571	Drosophila
CG12682	11	0.758647182	Drosophila
CG12684	10	0.878968844871795	Drosophila
CG12691	12	0.390291461538461	Drosophila
CG12692	2	0.888089147241379	Drosophila
CG12693	11	0.646669779473684	Drosophila
CG12697	10	0.400024357142857	Drosophila
CG12698	1	0.322273928164557	Drosophila
CG12699	12	1.01668258942308	Drosophila
CG12700	1	1.25196621444444	Drosophila
CG12702	6	0.638026324728261	Drosophila
CG12703	1	0.051787166	Drosophila
CG12708	11	0.118388628125	Drosophila
CG1271	1	0.0970786407142857	Drosophila
CG12717	2	0.571364122159091	Drosophila
CG12721	12	0.91225725304878	Drosophila
CG12723	11	0.0267831263513514	Drosophila
CG12725	12	1.06966525441176	Drosophila
CG12728	6	1.21981788092105	Drosophila
CG12729	10	0.439903864285714	Drosophila
CG1273	8	0.179435538690476	Drosophila
CG12736	1	0.153609150833333	Drosophila
CG1274	1	0	Drosophila
CG12740	2	0.056362075	Drosophila
CG12743	2	0.0125671607142857	Drosophila
CG12746	2	0.498933675	Drosophila
CG12749	1	0	Drosophila
CG1275	2	0.01313340625	Drosophila
CG12752	2	0.371138890789474	Drosophila
CG12754	10	0	Drosophila
CG12755	8	0.358763718	Drosophila
CG12758	7	0.0002545	Drosophila
CG12759	1	0.10766826440678	Drosophila
CG1276	3	0.0154887727272727	Drosophila
CG12765	5	0.1314131	Drosophila
CG12767	4	0.4320741	Drosophila
CG12768	4	0	Drosophila
CG12769	1	0.13084771969697	Drosophila
CG12770	2	0	Drosophila
CG12772	2	0.356621031578947	Drosophila
CG12773	1	0.0171974912280702	Drosophila
CG12775	1	0	Drosophila
CG12780	6	0.316728477777778	Drosophila
CG12783	1	0.222641651886792	Drosophila
CG12784	12	0.733969202631579	Drosophila
CG12788	1	0.368704145454545	Drosophila
CG12789	2	0.165003105625	Drosophila
CG12792	1	0.133666928703704	Drosophila
CG12797	1	0.0180030875	Drosophila
CG12799	1	0.0246031777777778	Drosophila
CG12800	1	0.0555903101851852	Drosophila
CG12806	9	0	Drosophila
CG12809	2	0.361118106914894	Drosophila
CG12811	10	0.341494476666667	Drosophila
CG12812	2	0.460369771527778	Drosophila
CG12813	4	0.0540092625	Drosophila
CG12818	4	0.203817456034483	Drosophila
CG12822	1	0.339135285344828	Drosophila
CG12826	11	0.064811115	Drosophila
CG12831	11	0.489563833088235	Drosophila
CG12832	6	0.224609572	Drosophila
CG12837	3	0.394940875	Drosophila
CG12838	4	0.07433547	Drosophila
CG12839	8	0.385732535714286	Drosophila
CG12840	6	0.318719125	Drosophila
CG12841	5	0.0620931333333333	Drosophila
CG12843	3	0.13696175	Drosophila
CG12844	4	0.0948333657894737	Drosophila
CG12845	3	0.0618608035714286	Drosophila
CG12846	2	0.146909161538462	Drosophila
CG12847	3	0.248070135227273	Drosophila
CG12848	4	0.05193995625	Drosophila
CG12849	11	0.435249490625	Drosophila
CG12855	2	0.0131712083333333	Drosophila
CG12857	4	0.640056544444444	Drosophila
CG12858	1	0	Drosophila
CG12859	4	0.07124598	Drosophila
CG12860	11	0.552546369594594	Drosophila
CG12861	11	0.11376939875	Drosophila
CG12862	12	2.3118955875	Drosophila
CG12863	2	0.243209655405405	Drosophila
CG12868	12	0.79014533125	Drosophila
CG12869	1	0.167538936111111	Drosophila
CG12876	2	0.0793161808823529	Drosophila
CG12877	2	0.309211957421875	Drosophila
CG12878	6	0.113437786607143	Drosophila
CG12880	10	0.648325942857143	Drosophila
CG12883	11	0.0099395	Drosophila
CG12892	1	0.292884315625	Drosophila
CG12895	1	0.3872904125	Drosophila
CG12905	11	0	Drosophila
CG12908	1	0.189411229022988	Drosophila
CG12909	2	0.124179731707317	Drosophila
CG12910	1	0	Drosophila
CG12913	2	0	Drosophila
CG12920	11	0.152125817391304	Drosophila
CG12921	6	0.104747608333333	Drosophila
CG12924	6	0.462493068	Drosophila
CG12926	2	0.198331797222222	Drosophila
CG12934	12	0.551011883695652	Drosophila
CG12935	3	0.04663416	Drosophila
CG12936	2	0.4100279975	Drosophila
CG12942	1	0.187500014150943	Drosophila
CG12944	10	0.480704130769231	Drosophila
CG12950	4	0.0494514878787879	Drosophila
CG12952	4	0.087778925	Drosophila
CG12954	2	0.0185043166666667	Drosophila
CG12960	11	0.279650696195652	Drosophila
CG12964	10	0.126790184666667	Drosophila
CG12971	12	0.497954826190476	Drosophila
CG12974	10	0.146027638392857	Drosophila
CG12975	2	0.164806614285714	Drosophila
CG12985	10	0.93908389125	Drosophila
CG1299	1	0.190525605769231	Drosophila
CG12990	2	0.5712159625	Drosophila
CG12993	10	0	Drosophila
CG13000	12	0.35717049	Drosophila
CG13001	5	0.0540092625	Drosophila
CG13005	11	0.4868353125	Drosophila
CG13008	10	0.32619465	Drosophila
CG13010	12	0.654823689285714	Drosophila
CG13014	12	0.08178533125	Drosophila
CG13016	3	0.0971737448717949	Drosophila
CG13018	2	0.0233929208333333	Drosophila
CG13023	11	0.432587209459459	Drosophila
CG13025	2	0.208922239830508	Drosophila
CG13026	12	0.80096753	Drosophila
CG13031	12	0.6798374	Drosophila
CG13032	3	0.165213383730159	Drosophila
CG13033	11	0.108962053125	Drosophila
CG13038	11	0.2053512	Drosophila
CG13039	12	0.285494071428571	Drosophila
CG1304	1	0.158935	Drosophila
CG13053	12	0.4651989	Drosophila
CG13055	10	0	Drosophila
CG13057	11	0.152410875	Drosophila
CG13058	11	0.0905166666666667	Drosophila
CG13059	6	0.259409385	Drosophila
CG13060	11	0	Drosophila
CG13061	12	0.02254483	Drosophila
CG13063	11	0	Drosophila
CG13064	11	0.106388491666667	Drosophila
CG13065	12	0.171042480555556	Drosophila
CG13069	2	0	Drosophila
CG13072	1	0.0406341384615385	Drosophila
CG13073	12	0.518667290625	Drosophila
CG13075	11	0.363803523333333	Drosophila
CG13076	1	0.266163573584906	Drosophila
CG13077	6	0.240460645	Drosophila
CG13078	10	0.08518825	Drosophila
CG13081	10	0.347677063157895	Drosophila
CG13082	11	0.214564997916667	Drosophila
CG13083	12	0.25154802983871	Drosophila
CG13084	12	0.119994979069767	Drosophila
CG13085	11	0.160698479166667	Drosophila
CG13086	11	0.0521060055555556	Drosophila
CG13089	2	0.0310249618421053	Drosophila
CG13090	1	0.0716776583333333	Drosophila
CG13091	1	0	Drosophila
CG13097	2	0.4915585125	Drosophila
CG13098	4	0.0219021833333333	Drosophila
CG13101	2	0.289400865384615	Drosophila
CG13102	11	0.349029518181818	Drosophila
CG13106	10	0.1261118625	Drosophila
CG13108	11	0.157800533333333	Drosophila
CG13109	6	0.198991559057971	Drosophila
CG13123	2	0.259380335833333	Drosophila
CG13124	6	0.28732343125	Drosophila
CG13125	1	0.144583305263158	Drosophila
CG13126	1	0.08935518	Drosophila
CG13127	10	0.500872197222222	Drosophila
CG13133	4	0	Drosophila
CG13137	1	0.793397338306452	Drosophila
CG13138	2	0.102029839102564	Drosophila
CG13139	4	0.0540092625	Drosophila
CG13140	6	0.236758759375	Drosophila
CG13142	2	0.23774173125	Drosophila
CG13144	11	0.121902430555556	Drosophila
CG13148	2	0.0437845547619048	Drosophila
CG1315	1	0.151096373484848	Drosophila
CG13151	4	0.275027455681818	Drosophila
CG13157	11	0.68914046875	Drosophila
CG1316	1	0	Drosophila
CG13160	1	0.116741575	Drosophila
CG13164	1	0.658298124210526	Drosophila
CG13167	1	0.02763425	Drosophila
CG1317	2	0.441614675	Drosophila
CG1318	1	0.217511586842105	Drosophila
CG13183	4	0	Drosophila
CG13192	1	0.153513871428571	Drosophila
CG13195	11	0.105897710416667	Drosophila
CG13196	8	0.227549418181818	Drosophila
CG13197	2	0.836407206111111	Drosophila
CG1320	1	0.0497211590909091	Drosophila
CG13201	5	0	Drosophila
CG13203	10	0.139255488541667	Drosophila
CG13204	4	0.155362122368421	Drosophila
CG13206	10	1.031800662	Drosophila
CG13209	7	0.219262031333333	Drosophila
CG13213	2	0.15703370625	Drosophila
CG13215	12	0.13990248	Drosophila
CG13217	12	0.19332595	Drosophila
CG13218	12	0.0576251071428571	Drosophila
CG13220	5	0	Drosophila
CG13221	5	0.0346266375	Drosophila
CG13222	4	0.394567722826087	Drosophila
CG13223	1	0.16501657606383	Drosophila
CG13224	6	0.10905725625	Drosophila
CG13225	10	0.0518736486111111	Drosophila
CG13227	12	0.318303183333333	Drosophila
CG13228	12	0.03147774	Drosophila
CG13229	6	0.0628811916666667	Drosophila
CG13230	11	0.02254483	Drosophila
CG13231	11	0	Drosophila
CG13232	1	0.074376888	Drosophila
CG13239	12	0.489702717307692	Drosophila
CG13243	7	0.11012248	Drosophila
CG13248	1	0	Drosophila
CG13251	10	0.225262011052632	Drosophila
CG13252	6	0.181998697619048	Drosophila
CG13255	11	0.334362333333333	Drosophila
CG13258	11	0.06995124	Drosophila
CG13270	1	0.203822588571429	Drosophila
CG13279	1	0.0615614545454545	Drosophila
CG13280	1	0.35365761484375	Drosophila
CG13282	1	0.172128371354167	Drosophila
CG13284	1	0.006799705	Drosophila
CG13285	12	0.0511260083333333	Drosophila
CG13287	6	0	Drosophila
CG13293	2	0	Drosophila
CG13295	2	0.25297216875	Drosophila
CG13296	1	0.0793973939393939	Drosophila
CG13297	11	0.497501325	Drosophila
CG13298	1	0	Drosophila
CG13299	12	0.0498656	Drosophila
CG13300	10	0.0567921666666667	Drosophila
CG13310	8	0.119042597222222	Drosophila
CG13311	11	0	Drosophila
CG13313	8	0.237573134782609	Drosophila
CG13316	3	1.16606834537037	Drosophila
CG13318	1	0.298137360416667	Drosophila
CG13320	1	0	Drosophila
CG13321	1	0.2728313	Drosophila
CG13322	2	0.64844286	Drosophila
CG13324	5	0.1038799125	Drosophila
CG13325	1	0.537091789855072	Drosophila
CG13326	4	0.0335429872881356	Drosophila
CG13329	1	0.299978535833333	Drosophila
CG13330	11	0.70136445	Drosophila
CG13334	1	0.102721921666667	Drosophila
CG13338	4	0.285137620689655	Drosophila
CG13344	2	0	Drosophila
CG13345	2	0.077077282051282	Drosophila
CG13349	2	0.224533135	Drosophila
CG13359	1	1.02540347921687	Drosophila
CG13360	6	0.0381061959677419	Drosophila
CG13361	11	0.332827334146341	Drosophila
CG13362	11	0.424449855921053	Drosophila
CG13363	3	0.208019573516949	Drosophila
CG13365	9	0.0625335590909091	Drosophila
CG13367	4	0.373463374358974	Drosophila
CG13369	1	0.359631992142857	Drosophila
CG13374	1	0.849619218382353	Drosophila
CG13375	1	0.0282669095238095	Drosophila
CG13376	12	0.19510789	Drosophila
CG13384	2	0.096662975	Drosophila
CG13387	2	0.176164494202899	Drosophila
CG13388	11	0.0957961539473684	Drosophila
CG13389	1	0.128883966666667	Drosophila
CG13390	1	0.0880894	Drosophila
CG13391	1	0.0360572663793103	Drosophila
CG13398	3	0.21272616	Drosophila
CG13399	2	0	Drosophila
CG1340	1	0	Drosophila
CG13400	2	0.48409344076087	Drosophila
CG13401	1	0.176802030737705	Drosophila
CG13410	4	0.1485854	Drosophila
CG13417	11	0.271886978205128	Drosophila
CG13418	1	0.528799576666667	Drosophila
CG13419	4	0	Drosophila
CG1342	1	0.0144662222222222	Drosophila
CG13422	6	0.19905590625	Drosophila
CG13430	1	0.67192325	Drosophila
CG13431	1	0.00875560416666667	Drosophila
CG13432	8	0.268950073333333	Drosophila
CG13437	11	0	Drosophila
CG13438	11	0.467500146590909	Drosophila
CG1345	1	0	Drosophila
CG13460	12	0.35794780462963	Drosophila
CG13463	12	0.166436977631579	Drosophila
CG13471	12	1.431811769	Drosophila
CG13472	2	0.276274505970149	Drosophila
CG13475	2	0.256090771052632	Drosophila
CG13476	12	0.364224431578947	Drosophila
CG13477	12	0.29812015	Drosophila
CG13478	1	0.021313296875	Drosophila
CG13480	11	0.35306484375	Drosophila
CG13493	11	0.586794616203704	Drosophila
CG13495	10	0.2922187	Drosophila
CG13501	11	0.21107606875	Drosophila
CG13510	2	0.38196382	Drosophila
CG13516	2	0.242477108333333	Drosophila
CG13518	10	0.626783113636364	Drosophila
CG13519	11	0.218818097619048	Drosophila
CG13524	10	0.0821045088235294	Drosophila
CG13527	1	0.790787248275862	Drosophila
CG13532	8	0	Drosophila
CG13533	4	0.1095724	Drosophila
CG1354	1	0.0214806611111111	Drosophila
CG13550	11	0.846998585032895	Drosophila
CG13551	4	0	Drosophila
CG13558	7	0.148313534375	Drosophila
CG13562	5	0.498047932894737	Drosophila
CG13564	3	0.2936304	Drosophila
CG13565	11	0.197868366666667	Drosophila
CG13570	1	0.523104757894737	Drosophila
CG13575	5	0.4247484625	Drosophila
CG13580	11	0.341244239166667	Drosophila
CG13587	10	0.649243871875	Drosophila
CG13590	11	0.0340753	Drosophila
CG13591	2	0.728091484589041	Drosophila
CG13594	10	0.578751668181818	Drosophila
CG13597	2	0.97247827739726	Drosophila
CG13599	3	0.154933232142857	Drosophila
CG13605	1	0.373477380645161	Drosophila
CG13607	1	0.040892665625	Drosophila
CG13608	4	0.0237854375	Drosophila
CG13610	1	0.274780375	Drosophila
CG13615	10	0.0491335107142857	Drosophila
CG13616	10	0.008051725	Drosophila
CG13617	2	0.208910830803571	Drosophila
CG13618	4	0.115250214285714	Drosophila
CG1362	1	0	Drosophila
CG13623	1	0.08101389375	Drosophila
CG13626	3	0	Drosophila
CG13627	11	0.10136655	Drosophila
CG13628	1	0	Drosophila
CG13630	1	0	Drosophila
CG13640	12	0.1165854	Drosophila
CG13643	4	0.092969575	Drosophila
CG13645	1	0.300729198958333	Drosophila
CG13651	5	0.118519843518518	Drosophila
CG13653	11	0.127630865	Drosophila
CG13667	1	0.314913562962963	Drosophila
CG13671	5	0.316592093253968	Drosophila
CG13676	4	0.126471666363636	Drosophila
CG13685	11	0	Drosophila
CG13686	1	0.596670885714286	Drosophila
CG13687	11	0.0900155	Drosophila
CG13688	2	0.0169563458333333	Drosophila
CG13691	1	0.265918642592593	Drosophila
CG13692	2	0.0813996125	Drosophila
CG13694	11	0.731100840384615	Drosophila
CG13695	9	0.394027755555556	Drosophila
CG13698	8	0.116926807142857	Drosophila
CG13699	10	0.160290779477612	Drosophila
CG13700	12	0.696604952564102	Drosophila
CG13701	11	0.87567659375	Drosophila
CG13704	10	0.00935716833333333	Drosophila
CG13707	11	0.161490072727273	Drosophila
CG13711	11	0.916992902083333	Drosophila
CG13712	12	0.12934538125	Drosophila
CG13713	11	0.056362075	Drosophila
CG13716	11	0.337286807142857	Drosophila
CG1372	1	0.0547364970588235	Drosophila
CG13733	12	0.564621951	Drosophila
CG13738	12	0.3497562	Drosophila
CG13745	2	0.104640093949045	Drosophila
CG13748	1	0.022688	Drosophila
CG13751	10	0.4651989	Drosophila
CG13759	1	0.186846338636364	Drosophila
CG13760	2	0.03866519	Drosophila
CG13761	2	0.120986584615385	Drosophila
CG13762	2	0.28978980494186	Drosophila
CG13766	11	0.424429144736842	Drosophila
CG13771	1	0.420211811805556	Drosophila
CG13772	1	0.0610006975490196	Drosophila
CG13773	2	0.113814325	Drosophila
CG13775	2	0.479904731428571	Drosophila
CG1378	4	0.00779764027777778	Drosophila
CG13786	12	0.195124780357143	Drosophila
CG13793	1	0.62242371440678	Drosophila
CG13795	2	0.108784429032258	Drosophila
CG13796	2	0.0449483704545455	Drosophila
CG1380	1	0.128659639583333	Drosophila
CG13801	1	0.30716818	Drosophila
CG1381	1	0.0380354394736842	Drosophila
CG13810	11	0.212202122222222	Drosophila
CG13822	2	0.346646590625	Drosophila
CG13827	3	0.0456822111111111	Drosophila
CG13833	1	0.308252872972973	Drosophila
CG13837	7	0.38035351875	Drosophila
CG13838	12	1.19119591413043	Drosophila
CG13841	11	1.5253667	Drosophila
CG13842	6	0.0599328233870968	Drosophila
CG13847	10	0.119875438942308	Drosophila
CG13848	3	0.14933846875	Drosophila
CG13849	1	0.00774438636363636	Drosophila
CG1385	6	0	Drosophila
CG13852	2	0	Drosophila
CG13855	2	0.168496139189189	Drosophila
CG1386	1	0.1316346625	Drosophila
CG13865	1	0.255970997058823	Drosophila
CG13868	8	0.521460825	Drosophila
CG13880	1	0.102163961111111	Drosophila
CG13887	2	0	Drosophila
CG13888	10	0.461572058333333	Drosophila
CG13890	1	0.180928730769231	Drosophila
CG13891	12	0.277757983333333	Drosophila
CG13892	1	0	Drosophila
CG13894	10	0.0929866239583333	Drosophila
CG13896	10	0.584691623148148	Drosophila
CG13897	5	0.128005995454545	Drosophila
CG13898	1	0.984309604166667	Drosophila
CG13900	2	0.0313085098360656	Drosophila
CG13901	2	0.207997094444444	Drosophila
CG13902	1	0.82850764375	Drosophila
CG13905	11	0.096662975	Drosophila
CG13906	3	0.686567510714286	Drosophila
CG1391	1	0.07433547	Drosophila
CG13917	4	0.360966486111111	Drosophila
CG13920	3	0	Drosophila
CG13922	1	0.058385615625	Drosophila
CG13926	2	0	Drosophila
CG13927	1	0.303398116860465	Drosophila
CG13928	11	0.118799020454545	Drosophila
CG13929	1	0.1341659425	Drosophila
CG13930	2	0.181534946774194	Drosophila
CG13931	12	0.194614261538462	Drosophila
CG13933	1	0.0177212114583333	Drosophila
CG13934	10	0.636606366666667	Drosophila
CG13935	4	0	Drosophila
CG13936	11	0.024324	Drosophila
CG13937	1	0.192774085714286	Drosophila
CG13939	10	0.598533422916667	Drosophila
CG13948	10	0	Drosophila
CG1395	2	0.1130703525	Drosophila
CG13956	1	0	Drosophila
CG13962	11	0.243430106666667	Drosophila
CG13965	12	1.0669727125	Drosophila
CG13968	10	0.124872373611111	Drosophila
CG13969	1	0.140410306666667	Drosophila
CG13970	12	1.3829723875	Drosophila
CG13972	6	0.289261326086957	Drosophila
CG13977	1	0.146871514642857	Drosophila
CG13978	1	0.414057698412698	Drosophila
CG13982	11	0.0248605795454546	Drosophila
CG13983	12	0.212303194736842	Drosophila
CG13989	12	0.6601806765625	Drosophila
CG13990	11	0.544334134659091	Drosophila
CG13991	11	0.347189925	Drosophila
CG13992	11	0.2984043725	Drosophila
CG13993	2	0.0187797884615385	Drosophila
CG13994	2	0.626223052941176	Drosophila
CG13995	5	0.231086943181818	Drosophila
CG13996	6	0	Drosophila
CG13997	12	0.94934259	Drosophila
CG13998	12	1.540554075	Drosophila
CG14005	11	0.557937553409091	Drosophila
CG1401	2	0	Drosophila
CG14015	1	0.280377270454545	Drosophila
CG1402	1	0	Drosophila
CG14021	2	0	Drosophila
CG14022	1	0	Drosophila
CG14024	1	0.0552359857142857	Drosophila
CG14025	6	0.14498585106383	Drosophila
CG14026	1	0.0218094216666667	Drosophila
CG14029	4	0.32236044125	Drosophila
CG1403	1	0	Drosophila
CG14039	6	0.528788951136364	Drosophila
CG14040	2	0.129009520689655	Drosophila
CG14043	2	0.0294496602678571	Drosophila
CG14044	6	0.136678983333333	Drosophila
CG14048	1	0.200606333333333	Drosophila
CG14053	12	0.821825039880952	Drosophila
CG14057	2	0.20135635	Drosophila
CG14059	11	0.24992424375	Drosophila
CG1406	2	0.0545235541666667	Drosophila
CG14061	3	0.423694326470588	Drosophila
CG14062	1	0	Drosophila
CG14064	6	0	Drosophila
CG14070	12	0.231591235	Drosophila
CG14071	12	0.1977771125	Drosophila
CG14072	12	0.4973681875	Drosophila
CG14074	11	0.331759750961538	Drosophila
CG14075	11	0.315805502777778	Drosophila
CG14077	3	0.285244006034483	Drosophila
CG14080	1	0.12564145	Drosophila
CG14082	10	0	Drosophila
CG14087	12	0.89301769044586	Drosophila
CG14089	12	0.550617553947368	Drosophila
CG1409	2	0.224902195	Drosophila
CG14100	1	0.213910329591837	Drosophila
CG14102	12	0.737664236206896	Drosophila
CG14103	10	0.227900931060606	Drosophila
CG14105	1	0.167335638095238	Drosophila
CG14107	11	0.0693956366666666	Drosophila
CG14109	11	0.116312010714286	Drosophila
CG14110	11	0.284818366071429	Drosophila
CG14111	12	0.551317075862069	Drosophila
CG14112	11	0.26554988125	Drosophila
CG14113	12	0.546210796875	Drosophila
CG14115	9	0.207727395833333	Drosophila
CG14118	1	0.455941876315789	Drosophila
CG1412	2	0	Drosophila
CG14122	2	0.0525755857142857	Drosophila
CG14130	1	0.06695595	Drosophila
CG14133	4	0.0989341833333333	Drosophila
CG1414	2	0.352693472222222	Drosophila
CG14151	12	0.108018525	Drosophila
CG14156	10	0.03691798046875	Drosophila
CG14157	10	0.152977955	Drosophila
CG1416	1	0.281784635	Drosophila
CG14162	4	0	Drosophila
CG14168	3	0.464120004545455	Drosophila
CG1417	1	0.0172499263157895	Drosophila
CG14184	4	0.58369745	Drosophila
CG14185	1	0.0375747166666667	Drosophila
CG14186	10	0.279471231818182	Drosophila
CG14190	12	1.16970555337838	Drosophila
CG14193	12	1.02683543026316	Drosophila
CG14194	4	0.0569608604166667	Drosophila
CG14195	11	0.0315043759259259	Drosophila
CG14196	1	0.335632348333333	Drosophila
CG14199	2	0	Drosophila
CG1420	2	0.22762288	Drosophila
CG14200	5	0.760415746564885	Drosophila
CG14205	1	0.17082475	Drosophila
CG14207	1	0	Drosophila
CG14209	2	0	Drosophila
CG14211	1	0.0866901130434783	Drosophila
CG14213	2	0.0406344489361702	Drosophila
CG14214	1	0	Drosophila
CG14215	4	0.858268733007812	Drosophila
CG14216	2	0.268256646428571	Drosophila
CG14218	12	0.0200128361111111	Drosophila
CG1422	2	0.0474705162790698	Drosophila
CG14220	2	0.0733424	Drosophila
CG14222	1	0.0322209916666666	Drosophila
CG14224	2	0.2717967	Drosophila
CG14225	10	1.81711929090909	Drosophila
CG14226	2	0.0940503701086956	Drosophila
CG14228	2	0	Drosophila
CG14231	1	0.233804691666667	Drosophila
CG14232	3	0.387290562962963	Drosophila
CG14233	11	0.102945085714286	Drosophila
CG14234	6	0.110554952380952	Drosophila
CG14235	2	0	Drosophila
CG14238	5	0.021603705	Drosophila
CG14250	10	0.0267387880952381	Drosophila
CG14251	11	0.266274180952381	Drosophila
CG14252	11	0.521848025	Drosophila
CG14253	10	0.5403121075	Drosophila
CG14254	10	0	Drosophila
CG14258	8	0.0724946283333333	Drosophila
CG14259	8	0.235201588461538	Drosophila
CG14262	10	0.306560065116279	Drosophila
CG14266	12	0.49385355	Drosophila
CG14269	11	0.0540744037037037	Drosophila
CG1427	1	0.4196199	Drosophila
CG14271	2	0	Drosophila
CG14283	4	0.0375747166666667	Drosophila
CG14291	1	0.133805941304348	Drosophila
CG14296	2	0	Drosophila
CG1430	2	0.03227006	Drosophila
CG14305	1	0.254653656944444	Drosophila
CG14309	10	0.237928319565217	Drosophila
CG14312	8	0.8153901	Drosophila
CG14313	11	0.4236225	Drosophila
CG14314	1	0.00500086111111111	Drosophila
CG14315	11	0.353507698076923	Drosophila
CG14316	11	0.541656895703125	Drosophila
CG14317	11	0.23397855625	Drosophila
CG14321	2	0.0538432222222222	Drosophila
CG14325	1	0.322018563636364	Drosophila
CG14326	12	0	Drosophila
CG14332	12	0.837475118181818	Drosophila
CG14334	8	0.140047895833333	Drosophila
CG14339	6	0.300191226953125	Drosophila
CG1434	1	0.184787024324324	Drosophila
CG1435	1	0	Drosophila
CG14353	2	0.13401849	Drosophila
CG14355	11	0.124764766964286	Drosophila
CG14360	10	0.5110409125	Drosophila
CG14362	2	0.189038170588235	Drosophila
CG14369	12	1.21327189166667	Drosophila
CG14370	12	0.2777425875	Drosophila
CG14372	4	0.0389302961538462	Drosophila
CG14375	10	0.541114895	Drosophila
CG14376	7	0.273418848106061	Drosophila
CG14380	11	0.16106315	Drosophila
CG14387	2	0.0814273333333333	Drosophila
CG14391	11	0.314956	Drosophila
CG14395	7	0.0885895440860215	Drosophila
CG14396	1	0.211159335042735	Drosophila
CG14401	11	0.330872748611111	Drosophila
CG14402	10	0.546286526086956	Drosophila
CG14405	11	0.30799725375	Drosophila
CG14407	1	0.08903715	Drosophila
CG14408	2	0.0935784	Drosophila
CG1441	1	0.11819335	Drosophila
CG14411	2	0.167122067692308	Drosophila
CG14413	3	0.0146933214285714	Drosophila
CG1442	1	0.899544263636364	Drosophila
CG14420	12	0.389258933333333	Drosophila
CG14422	12	0.742446644444444	Drosophila
CG14424	11	0	Drosophila
CG14427	11	0	Drosophila
CG1443	1	0.12198246875	Drosophila
CG1444	1	0.219501935714286	Drosophila
CG14444	1	0.201313726	Drosophila
CG14456	11	0.151504926315789	Drosophila
CG14457	8	0.04552725	Drosophila
CG14463	6	0.13549300952381	Drosophila
CG14468	7	0.291885892	Drosophila
CG1447	2	0	Drosophila
CG14476	1	0.213579140957447	Drosophila
CG14480	2	0.133803473076923	Drosophila
CG14482	8	3.646700875	Drosophila
CG14485	6	0.1273779	Drosophila
CG14488	11	0	Drosophila
CG14489	6	0.230837273076923	Drosophila
CG14492	11	0.136285968421053	Drosophila
CG14502	11	0.412538810416667	Drosophila
CG14506	2	0.733758702884615	Drosophila
CG14508	1	0.150875785185185	Drosophila
CG1451	2	0	Drosophila
CG14512	1	0.421394628571429	Drosophila
CG14516	1	0.0442876722222222	Drosophila
CG14517	1	0.289719673275862	Drosophila
CG14521	1	0.087922125	Drosophila
CG1453	2	0.146909161538462	Drosophila
CG14535	2	0.08178533125	Drosophila
CG14536	2	0	Drosophila
CG1454	1	0	Drosophila
CG14542	2	0	Drosophila
CG14544	1	0.284900194444444	Drosophila
CG14548	4	0	Drosophila
CG14549	2	0.0079516	Drosophila
CG1455	1	0	Drosophila
CG14563	12	0.00650935294117647	Drosophila
CG14565	11	0.598378530769231	Drosophila
CG14566	11	0.0649242875	Drosophila
CG14568	1	0.610813716304348	Drosophila
CG14569	10	0.405885986111111	Drosophila
CG14570	10	0.327511299193548	Drosophila
CG14572	11	0.435139833035714	Drosophila
CG14573	12	0.290953997115385	Drosophila
CG14575	4	0.229832843125	Drosophila
CG14577	2	0.00935716833333333	Drosophila
CG14579	12	0.772998324561403	Drosophila
CG1458	1	0.8844545	Drosophila
CG14590	1	0.286858426666667	Drosophila
CG14591	2	0.169228828225806	Drosophila
CG14598	12	0.53040300078125	Drosophila
CG14605	1	0.208188281578947	Drosophila
CG14606	1	0.110190809659091	Drosophila
CG14607	4	0.157171173888889	Drosophila
CG14609	10	0	Drosophila
CG1461	1	0.0982491785714286	Drosophila
CG14615	1	0.730949997580645	Drosophila
CG14618	2	0.430122626923077	Drosophila
CG14619	1	0.3788324015625	Drosophila
CG1462	1	0.0624030878378378	Drosophila
CG14621	2	0.0103334473684211	Drosophila
CG14622	2	0.0814272493421053	Drosophila
CG14625	11	0.2865707	Drosophila
CG14630	1	0.232153295454545	Drosophila
CG14635	12	0.6066035234375	Drosophila
CG14636	10	0.259373223125	Drosophila
CG14637	1	0.0609969590909091	Drosophila
CG14639	10	0.247304262790698	Drosophila
CG14640	4	0.245363820454545	Drosophila
CG14641	1	0.0247356	Drosophila
CG14643	10	0.177621309302326	Drosophila
CG14645	11	0.1014165625	Drosophila
CG14646	3	0.312563907386364	Drosophila
CG14650	1	0.295527869602273	Drosophila
CG14655	1	0.104104208333333	Drosophila
CG14657	11	0.543043862244898	Drosophila
CG14658	11	0.106217376923077	Drosophila
CG14659	11	0.732077800961539	Drosophila
CG14660	12	0.859290685294118	Drosophila
CG14662	10	0.43626084246988	Drosophila
CG14667	1	0.861104065178571	Drosophila
CG14668	12	1.09967130125	Drosophila
CG14670	1	0.3552934835	Drosophila
CG14680	1	0.127678353	Drosophila
CG14686	9	0.0795673166666666	Drosophila
CG14689	6	0	Drosophila
CG1469	2	0.285795871428571	Drosophila
CG14693	1	0.119350975	Drosophila
CG14695	7	0.854536204545454	Drosophila
CG14696	2	0.0236760862068966	Drosophila
CG1470	1	0.00331316666666667	Drosophila
CG14704	1	0.21651625	Drosophila
CG1471	1	0	Drosophila
CG14710	1	0.201663722222222	Drosophila
CG14712	11	0.722861143571429	Drosophila
CG14715	1	0	Drosophila
CG14716	1	0.0909437666666667	Drosophila
CG14721	1	0.0359901958333333	Drosophila
CG14722	1	0.333288686842105	Drosophila
CG14723	1	0.00490105	Drosophila
CG14724	3	0	Drosophila
CG14728	1	0.17560011875	Drosophila
CG14731	2	0.353697093243243	Drosophila
CG14735	10	0.1722877671875	Drosophila
CG14739	1	0.221626457142857	Drosophila
CG14740	1	0.327922030681818	Drosophila
CG14741	1	0.224875212666667	Drosophila
CG14743	2	0.1038799125	Drosophila
CG14749	2	0.863474425925926	Drosophila
CG1475	1	0	Drosophila
CG14750	2	0	Drosophila
CG14760	1	0.19198664125	Drosophila
CG14763	2	0	Drosophila
CG14764	2	0.247467637179487	Drosophila
CG14767	4	0.0260242419354839	Drosophila
CG14770	10	0.0210936519230769	Drosophila
CG14777	2	0.138081796666667	Drosophila
CG14778	2	0.0100017222222222	Drosophila
CG14779	3	0.0813996125	Drosophila
CG14780	1	0.0879635379310345	Drosophila
CG14782	1	0.023084425	Drosophila
CG14785	6	0.422675998214286	Drosophila
CG14786	2	0.349006766292135	Drosophila
CG14789	2	0.214655075735294	Drosophila
CG14795	10	1.0638716640625	Drosophila
CG14796	8	0.519409845801527	Drosophila
CG14802	2	0	Drosophila
CG14803	5	0.40193190425	Drosophila
CG14804	2	0.09674038046875	Drosophila
CG14805	1	0.453990865086207	Drosophila
CG14806	3	0	Drosophila
CG14808	3	0.147968955952381	Drosophila
CG14810	12	1.12900156964286	Drosophila
CG14811	12	0.909366986702128	Drosophila
CG14812	3	1.95375505	Drosophila
CG14813	2	0.154986301315789	Drosophila
CG14814	1	0.580438856868132	Drosophila
CG14816	1	0.0670310555555555	Drosophila
CG14817	6	0.00567971428571428	Drosophila
CG14818	10	0.000763499999999999	Drosophila
CG14820	1	0.353751354310345	Drosophila
CG14823	4	0.296447422058823	Drosophila
CG14827	12	0.784777791911765	Drosophila
CG1483	11	0.3872904125	Drosophila
CG1484	1	0.129171900333333	Drosophila
CG14851	12	0.822115708928571	Drosophila
CG14853	4	0.2191162925	Drosophila
CG14855	1	0.170566363333333	Drosophila
CG14856	1	0.404914552040816	Drosophila
CG1487	3	0	Drosophila
CG1488	1	0.193065646938776	Drosophila
CG14880	4	0	Drosophila
CG14881	1	0.0236929166666667	Drosophila
CG14882	1	0.23949259469697	Drosophila
CG14884	1	0	Drosophila
CG14886	1	0	Drosophila
CG1489	1	0	Drosophila
CG14891	1	0.826247838	Drosophila
CG14892	1	0.0488455930555556	Drosophila
CG14895	1	0	Drosophila
CG14901	11	0.331201846875	Drosophila
CG14902	2	0.0400439631578947	Drosophila
CG14903	2	0.0755490272727273	Drosophila
CG14904	1	0.434888583333333	Drosophila
CG14909	2	0.0100017222222222	Drosophila
CG14916	10	0.04688044625	Drosophila
CG14919	8	0.161927864285714	Drosophila
CG1492	1	0.204477583823529	Drosophila
CG14930	12	0.640975930555555	Drosophila
CG14931	11	0.328603958695652	Drosophila
CG14932	12	0.721393456875	Drosophila
CG14934	1	0.094446925	Drosophila
CG14936	5	0.0994257666666667	Drosophila
CG14937	11	0.537922675757576	Drosophila
CG14938	1	0	Drosophila
CG14939	2	0	Drosophila
CG14941	1	0.100516794736842	Drosophila
CG14945	1	0.160728787777778	Drosophila
CG14946	1	0.103801430769231	Drosophila
CG14949	10	0.4299890625	Drosophila
CG14959	4	0	Drosophila
CG14960	10	0.197351975	Drosophila
CG14962	2	0.307199715625	Drosophila
CG14966	1	0.43615535	Drosophila
CG14967	2	0.0890136303308823	Drosophila
CG14971	2	0.283256560526316	Drosophila
CG14974	12	0.450221858333333	Drosophila
CG14975	12	0	Drosophila
CG14977	4	0.134673145	Drosophila
CG14979	10	0.176701710344828	Drosophila
CG14980	2	0.200055282142857	Drosophila
CG14981	3	0.1960514	Drosophila
CG14982	10	0.0124726419354839	Drosophila
CG14983	2	0.711468606730769	Drosophila
CG14989	1	0.583779183333333	Drosophila
CG14991	2	0.0731148138888889	Drosophila
CG14992	1	0	Drosophila
CG14993	1	0.0432393928571429	Drosophila
CG14994	1	0	Drosophila
CG14997	1	0.0560098516129032	Drosophila
CG15002	1	0.0655999395348837	Drosophila
CG15005	1	0.233786511486486	Drosophila
CG15008	4	0.115250214285714	Drosophila
CG15009	4	0.020051075	Drosophila
CG15016	1	0	Drosophila
CG15021	11	0.477454775	Drosophila
CG15031	4	1.39364500181818	Drosophila
CG15033	10	0.22969405	Drosophila
CG15034	12	0.0213963875	Drosophila
CG15035	1	0.946074184154929	Drosophila
CG15036	12	0.3190771625	Drosophila
CG1504	1	0	Drosophila
CG15046	6	0.0438043666666667	Drosophila
CG15056	11	0.914444679861111	Drosophila
CG15064	12	0.27723105	Drosophila
CG15065	12	2.12551703333333	Drosophila
CG15066	12	0.253676572222222	Drosophila
CG15067	12	0.13085653	Drosophila
CG15068	12	0	Drosophila
CG15073	1	0.101106820967742	Drosophila
CG15082	10	0.197582105	Drosophila
CG15083	11	0.180791045	Drosophila
CG15084	2	0.0577324797619048	Drosophila
CG15085	4	0.236455175	Drosophila
CG15087	2	0	Drosophila
CG15093	1	0.114973672222222	Drosophila
CG15094	1	0.0364640946428571	Drosophila
CG15095	1	0	Drosophila
CG15096	1	0.133067123076923	Drosophila
CG15097	1	0.0121933823529412	Drosophila
CG15098	9	0.476174872222222	Drosophila
CG15100	1	0.208978491752577	Drosophila
CG15101	1	0.073353213372093	Drosophila
CG15102	1	0.0287974727272727	Drosophila
CG15106	1	0.0488514553571429	Drosophila
CG15107	8	0.561877595833333	Drosophila
CG15110	2	0.00899190465116279	Drosophila
CG15112	2	0	Drosophila
CG15119	4	0.438625522580645	Drosophila
CG15120	2	0	Drosophila
CG15122	11	0.278591267647059	Drosophila
CG15124	12	0.658270365178571	Drosophila
CG15125	4	0.032676	Drosophila
CG15128	10	0.1466758875	Drosophila
CG15130	6	0	Drosophila
CG15136	12	0.704646885714286	Drosophila
CG15138	8	0	Drosophila
CG1514	2	0	Drosophila
CG15153	8	0	Drosophila
CG15155	1	0.0185121	Drosophila
CG1516	1	0.00837980866666667	Drosophila
CG15160	2	0	Drosophila
CG15171	1	0.383844183333333	Drosophila
CG15173	1	0.215384714583333	Drosophila
CG15177	2	0	Drosophila
CG15179	3	0.191978096153846	Drosophila
CG1518	1	0	Drosophila
CG15186	9	0.0931434647058823	Drosophila
CG1519	1	0.087998295	Drosophila
CG15191	2	0.156555022222222	Drosophila
CG15196	12	0.926102094047619	Drosophila
CG1520	2	0	Drosophila
CG15212	11	0	Drosophila
CG15213	11	0	Drosophila
CG15218	2	0.101584687804878	Drosophila
CG15219	12	0.839322786363636	Drosophila
CG15224	2	0	Drosophila
CG15225	12	0.655714724	Drosophila
CG15227	1	1.60397274924242	Drosophila
CG1523	1	0.270264663888889	Drosophila
CG15236	10	0.345690558333333	Drosophila
CG1524	1	0.0733410454545454	Drosophila
CG15254	1	0.0686880631578947	Drosophila
CG15255	1	0.144962861111111	Drosophila
CG15258	12	0.368468930882353	Drosophila
CG15262	2	0.743288671052632	Drosophila
CG15263	1	0.01632053125	Drosophila
CG15267	8	0.1877140375	Drosophila
CG1527	1	0.0131058846153846	Drosophila
CG15270	2	0.342545068032787	Drosophila
CG15278	12	0.039758	Drosophila
CG15279	1	0.0761410592592593	Drosophila
CG15293	12	0.503910503645833	Drosophila
CG15296	10	0.542720661111111	Drosophila
CG15302	10	0.0607557145833333	Drosophila
CG15308	12	0.426530103571429	Drosophila
CG1532	1	0.426608504166667	Drosophila
CG15324	2	0	Drosophila
CG15325	10	0.0554606846153846	Drosophila
CG15326	9	0.3702143875	Drosophila
CG15329	3	0.320622067391304	Drosophila
CG15330	12	0.656926220833333	Drosophila
CG15332	12	0.719173627737226	Drosophila
CG15335	8	0.0547575308823529	Drosophila
CG15337	11	0.30343872421875	Drosophila
CG15343	1	0.128296033333333	Drosophila
CG15347	11	0.197133	Drosophila
CG15350	11	0.0415816134615385	Drosophila
CG15351	11	0.238411046052632	Drosophila
CG15356	2	0.191613977439024	Drosophila
CG15357	11	0.343463325	Drosophila
CG15362	1	0.27723528	Drosophila
CG15365	6	0.180838985204082	Drosophila
CG15367	12	0.54056885	Drosophila
CG15368	2	0.201687875	Drosophila
CG15370	12	4.0342511	Drosophila
CG15377	10	0.44057993	Drosophila
CG15382	12	0.11890948	Drosophila
CG15385	2	0.0117167242424242	Drosophila
CG15386	11	0.21603705	Drosophila
CG15390	6	0.267938559375	Drosophila
CG15395	11	0.305807089130435	Drosophila
CG15399	4	0.503124346212121	Drosophila
CG15404	12	0.532979671428571	Drosophila
CG15406	1	0.378027516666667	Drosophila
CG15408	1	0.947782798	Drosophila
CG15414	11	0.103404278947368	Drosophila
CG15418	1	0.60452345	Drosophila
CG1542	2	0	Drosophila
CG15427	1	0.0255885614130435	Drosophila
CG1543	1	0.0121129691176471	Drosophila
CG15431	10	0.0376096851851852	Drosophila
CG15433	1	0	Drosophila
CG15434	2	0	Drosophila
CG15436	1	0.679560946153846	Drosophila
CG15437	1	0	Drosophila
CG15439	2	0.0749458142857143	Drosophila
CG15440	1	0.231415484090909	Drosophila
CG15443	6	0.283609499	Drosophila
CG15444	1	0.168668631363636	Drosophila
CG15449	10	0	Drosophila
CG15456	1	0.06635687	Drosophila
CG15457	11	0	Drosophila
CG1546	1	0.407532525	Drosophila
CG15471	7	1.08043357352941	Drosophila
CG15472	11	0.834227125925926	Drosophila
CG15475	12	0.5908743725	Drosophila
CG15478	10	0.196281930263158	Drosophila
CG15479	11	0.85349425	Drosophila
CG1548	1	0.0263564586206897	Drosophila
CG15481	1	0.00283985714285714	Drosophila
CG15497	8	0.466916110714286	Drosophila
CG15498	2	0.05375467	Drosophila
CG15504	4	0	Drosophila
CG15510	11	0.515164140243902	Drosophila
CG15514	6	0.210802779545455	Drosophila
CG15515	10	0.0181504	Drosophila
CG15517	7	0.444737475	Drosophila
CG15524	2	0.204510123404255	Drosophila
CG15530	12	0.270958764285714	Drosophila
CG15533	1	0.174368481944444	Drosophila
CG15535	10	0.271144602777778	Drosophila
CG1554	1	0	Drosophila
CG15551	2	0.231516407142857	Drosophila
CG15552	2	0.208353077884615	Drosophila
CG15554	12	0.293625805	Drosophila
CG15556	2	0.138955004255319	Drosophila
CG15564	11	0.0219853740740741	Drosophila
CG15570	1	0.391151677517986	Drosophila
CG15571	12	0.491655261111111	Drosophila
CG15572	12	0.69509304335443	Drosophila
CG15573	12	0.501483791666667	Drosophila
CG15576	12	0.981625831578947	Drosophila
CG15577	12	0.31454831	Drosophila
CG15578	12	0.722857505147059	Drosophila
CG15579	11	0.05856419	Drosophila
CG15580	1	0.220564603481013	Drosophila
CG15581	10	0.112865165740741	Drosophila
CG15582	11	1.509609825	Drosophila
CG15585	11	0.450461918181818	Drosophila
CG15589	8	0.259733732894737	Drosophila
CG1559	1	0.184648640384615	Drosophila
[truncated: 23,639 more rows]
